# Supplementary material
Source: MDPI journal article supplement (https://www.mdpi.com/2073-4344/8/5/194)

# Supplementary Materials: Palladium-Catalyzed Isomerization-Coupling Reactions of Allyl Chloride with Amines to Generate Functionalized Phosphorus Derivatives

Jing-Hong Wen, Qiang Li, Shao-Zhen Nie, Jing-Jing Ye, Qing Xu, and Chang-Qiu Zhao

## Table of Contents

|                                                                                                                    |     |
|--------------------------------------------------------------------------------------------------------------------|-----|
| Part 1. Crystallographic Information.                                                                              | S3  |
| Part 2. The NMR spectrum for the mechanism of 1f with benzyl amine.                                                | S6  |
| Part 3. Selected $^{31}\text{P}$ , $^1\text{H}$ and $^{13}\text{C}$ NMR spectroscopy of 1, 2, 4, 5, 11, 12 and 13. | S10 |

**General Chemistry:**

The  $^1\text{H}$  NMR spectrum was recorded on a 400-MHz spectrometer. The chemical shift for  $^1\text{H}$  NMR spectra is reported (in parts per million) relative to internal tetramethylsilane ( $\text{Me}_4\text{Si}$ ,  $\delta = 0.00$  ppm) with  $\text{CDCl}_3$ .  $^{13}\text{C}$  NMR spectra were recorded at 101 MHz. Chemical shifts for  $^{13}\text{C}$  NMR spectra are reported (in parts per million) relative to  $\text{CDCl}_3$  ( $\delta = 77.0$  ppm).  $^{31}\text{P}$  NMR spectra were recorded at 162 MHz, and chemical shifts are reported (in parts per million) relative to external 85% phosphoric acid ( $\delta = 0.0$  ppm). TLC plates were visualized by UV. All starting materials were purchased from commercial sources and used as received. The solvents were distilled under  $\text{N}_2$  and dried according to standard procedures.  $^{31}\text{P}$  NMR spectra were referenced to phosphoric acid. The NMR yields of the articles are determined by integration of all of the resonances in the  $^{31}\text{P}$  spectra. The yields obtained by the approach are generally accurate and reproducible.

**Part 1. Crystallographic Information.****Table S1.** (*S<sub>P</sub>*)-menthyl 3-oxo-3-phenylpropyl phenylphosphinate, 5a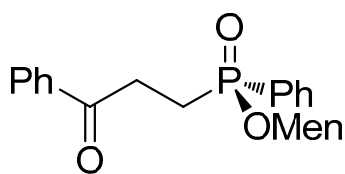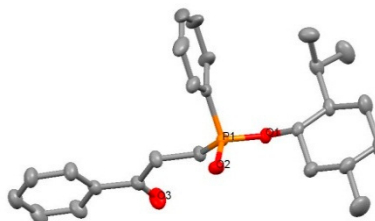

| Empirical formula     | C <sub>25</sub> H <sub>33</sub> O <sub>3</sub> P |
|-----------------------|--------------------------------------------------|
| Crystal system        | Orthorhombic                                     |
| Space group           | P212121                                          |
| Formula weight        | 412.48                                           |
| a, Å                  | 8.4732(9)                                        |
| b, Å                  | 11.1296(11)                                      |
| c, Å                  | 25.186(3)                                        |
| α, deg                | 90                                               |
| β, deg                | 90                                               |
| γ, deg                | 90                                               |
| V, Å <sup>3</sup>     | 2375.1(4)                                        |
| Z                     | 4                                                |
| T, K                  | 293(2)                                           |
| λ, Å                  | 0.71073                                          |
| ρ, g cm <sup>-3</sup> | 1.154                                            |
| R <sub>int</sub>      | 0.0331                                           |
| R1 [I N 2σ(I)]        | 0.0425                                           |
| R1 (all data)         | 0.0645                                           |
| wR2 [I N 2σ(I)]       | 0.0931                                           |
| wR2 (all data)        | 0.1029                                           |
| Flack                 | -0.02(11)                                        |
| CCDC                  | 1575335                                          |

**Table S2.** Diphenyl 3-oxo-3-phenyl propylphosphonate, 5f

|                                                                                   |                                                                                    |
|-----------------------------------------------------------------------------------|------------------------------------------------------------------------------------|
| 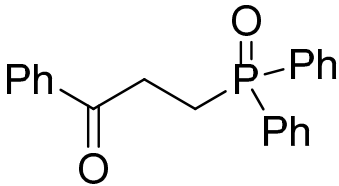 | 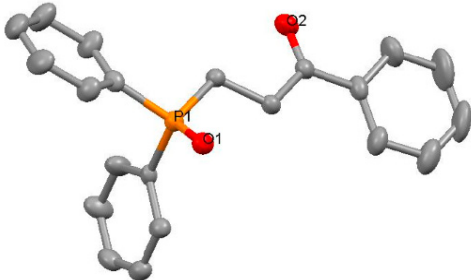 |
| Empirical formula                                                                 | C <sub>21</sub> H <sub>19</sub> O <sub>3</sub> P                                   |
| Crystal system                                                                    | Monoclinic                                                                         |
| Space group                                                                       | P21                                                                                |
| Formula weight                                                                    | 334.33                                                                             |
| a, Å                                                                              | 9.4304(7)                                                                          |
| b, Å                                                                              | 19.0866(16)                                                                        |
| c, Å                                                                              | 10.2263(8)                                                                         |
| α, deg                                                                            | 90                                                                                 |
| β, deg                                                                            | 102.868(3)                                                                         |
| γ, deg                                                                            | 90                                                                                 |
| V, Å <sup>3</sup>                                                                 | 1794.4(2)                                                                          |
| Z                                                                                 | 2                                                                                  |
| T, K                                                                              | 298(2)                                                                             |
| λ, Å                                                                              | 0.71073                                                                            |
| ρ, g cm <sup>-3</sup>                                                             | 1.238                                                                              |
| R <sub>int</sub>                                                                  | 0.0478                                                                             |
| R1 [I N 2σ(I)]                                                                    | 0.0480                                                                             |
| R1 (all data)                                                                     | 0.1024                                                                             |
| wR2 [I N 2σ(I)]                                                                   | 0.0724                                                                             |
| wR2 (all data)                                                                    | 0.0851                                                                             |
| Flack                                                                             | 0.00(10)                                                                           |
| CCDC                                                                              | 1575336                                                                            |

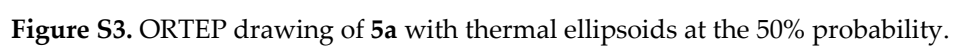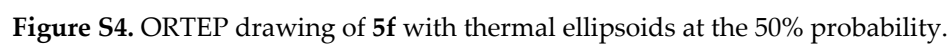

**Part 2. The NMR spectrum for the mechanism of 1f with benzyl amine.** **$^{31}\text{P}$ -NMR spectroscopy of crude 7f/5f=93:7**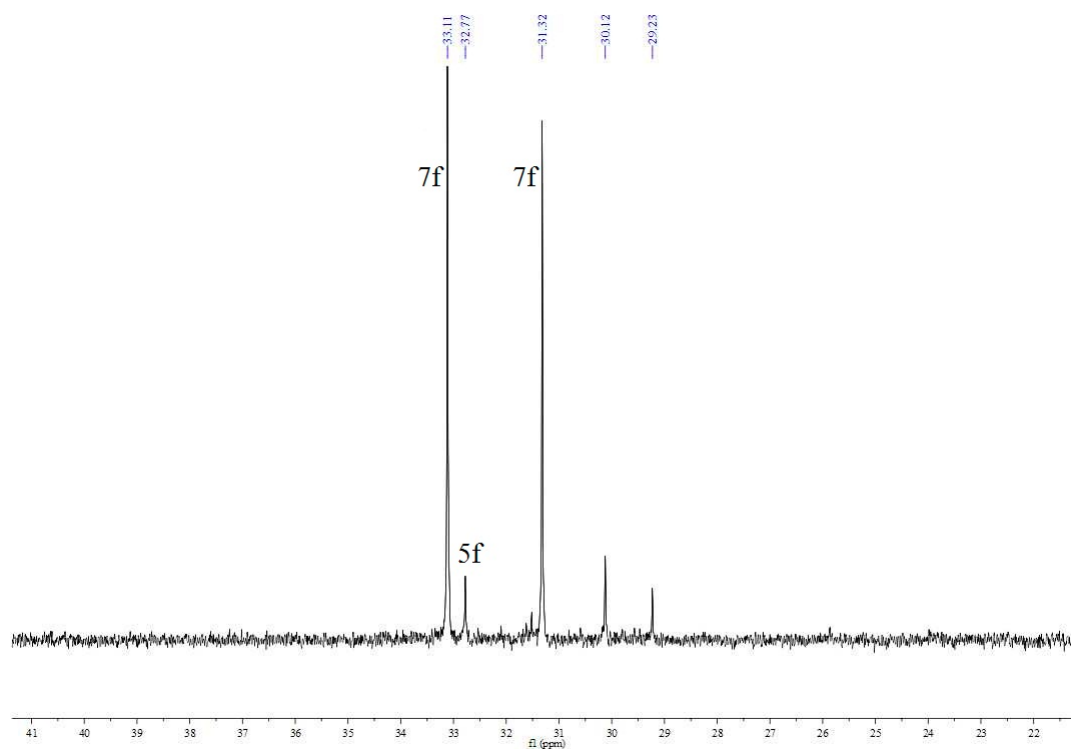 **$^1\text{H}$ -NMR spectroscopy of crude 7f/5f**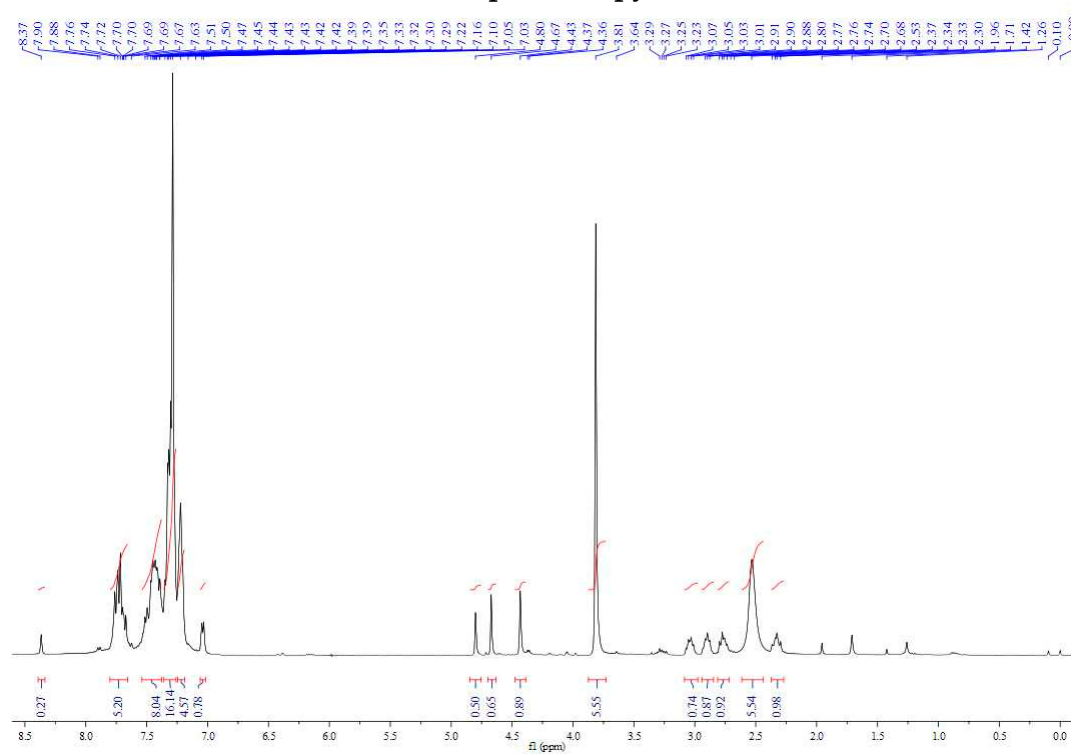

**$^{31}\text{P}$ -NMR spectroscopy of crude 7f/5f=30:70**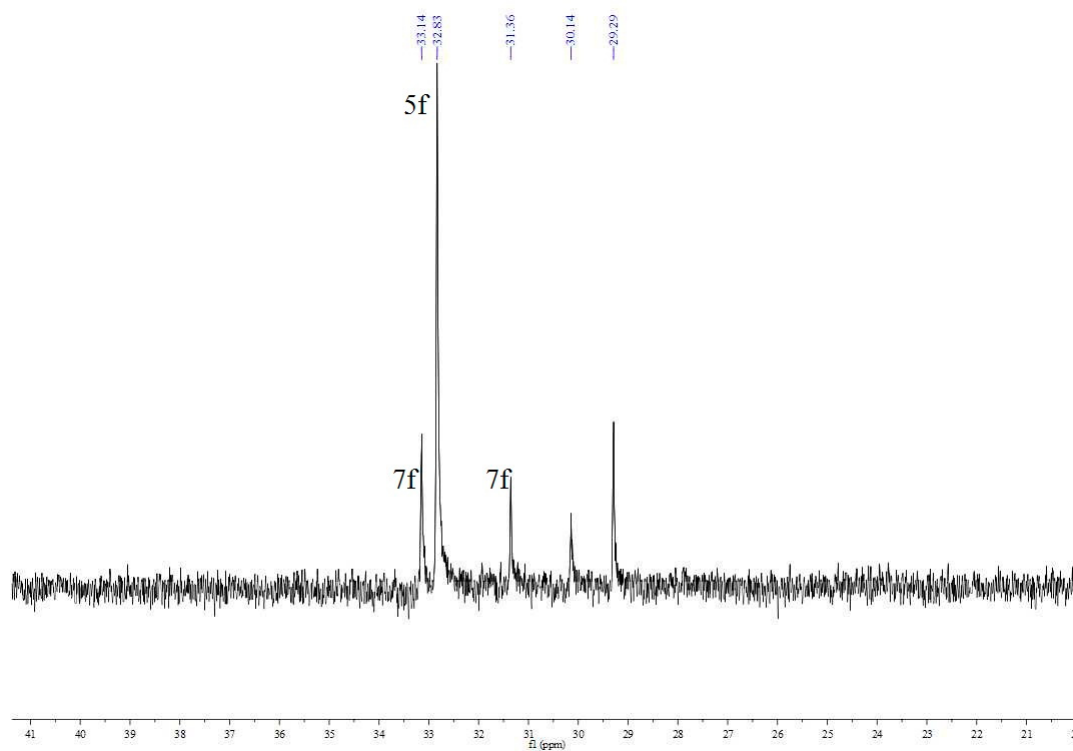 **$^1\text{H}$ -NMR spectroscopy of crude 7f/5f**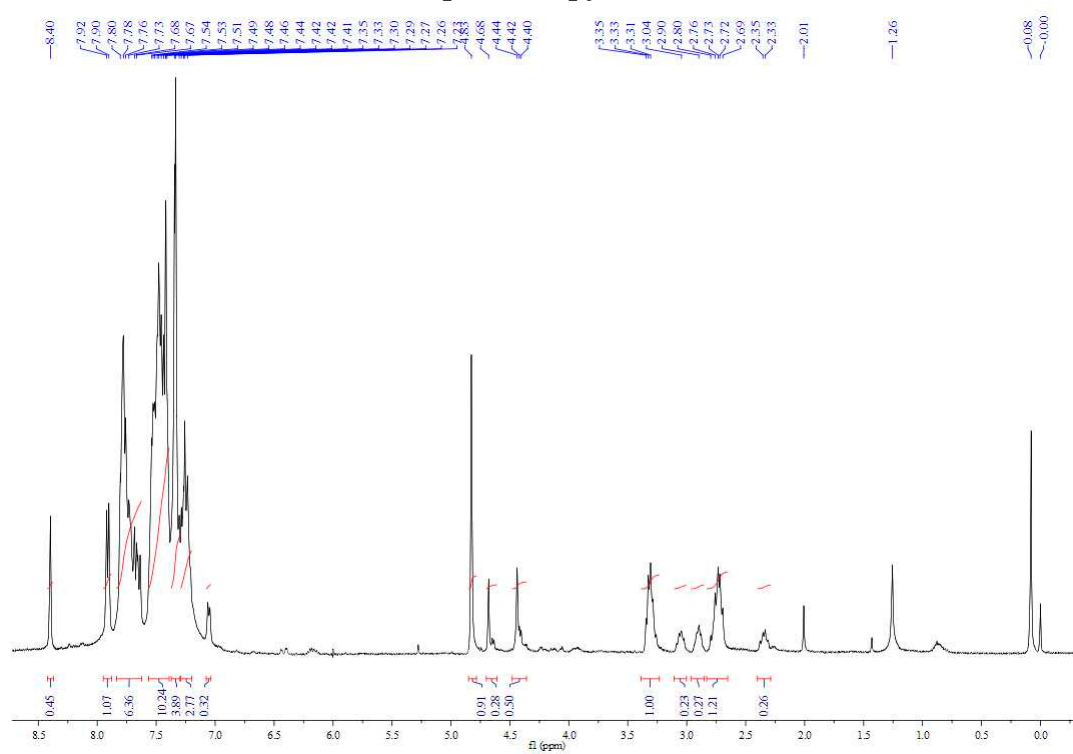

**$^{31}\text{P}$ -NMR spectroscopy of crude 7f/5f=10:90**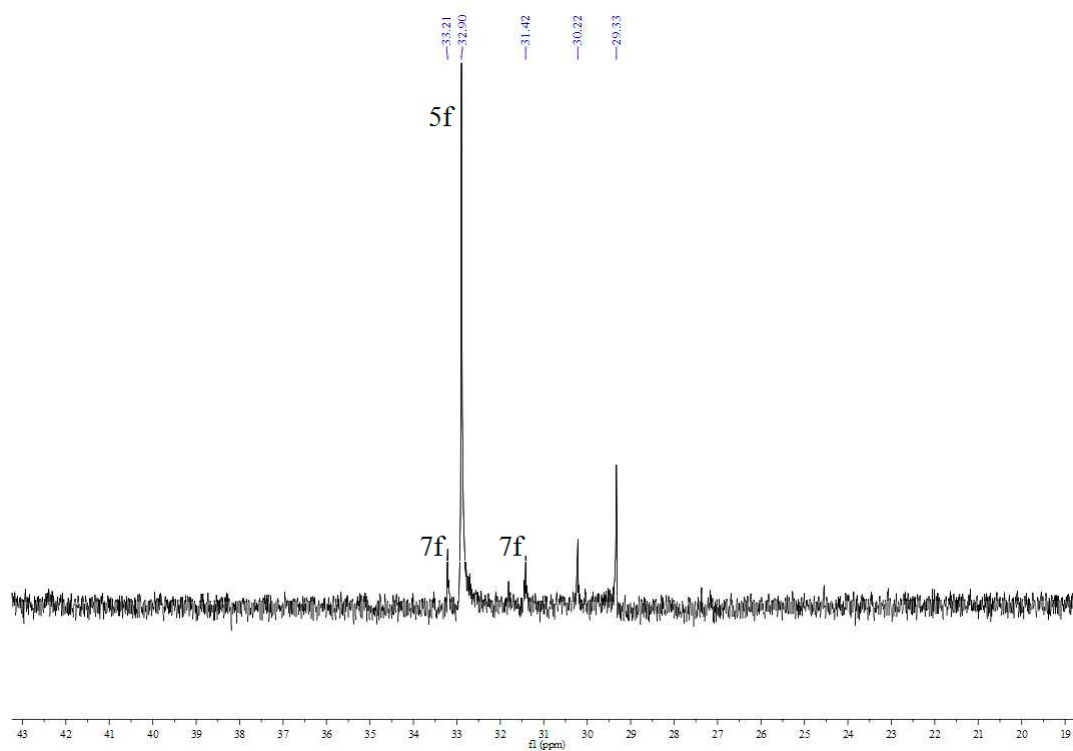 **$^1\text{H}$ -NMR spectroscopy of crude 7f/5f**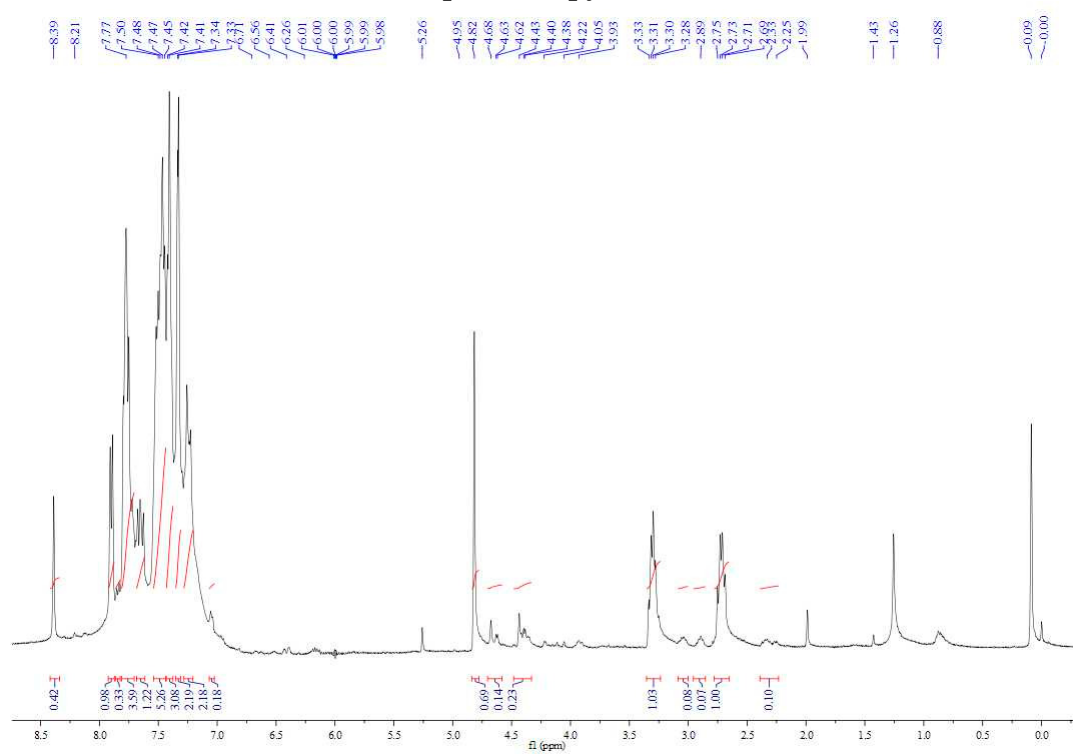

**$^{31}\text{P}$ -NMR spectroscopy of crude 5f**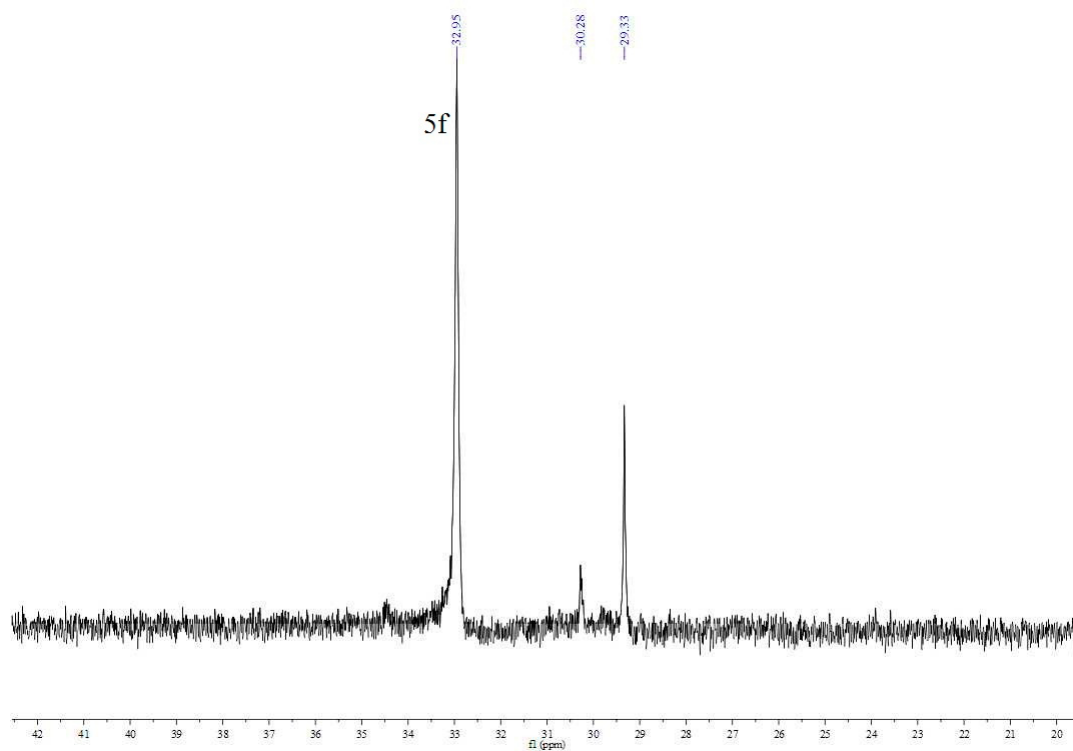 **$^1\text{H}$ -NMR spectroscopy of crude 5f**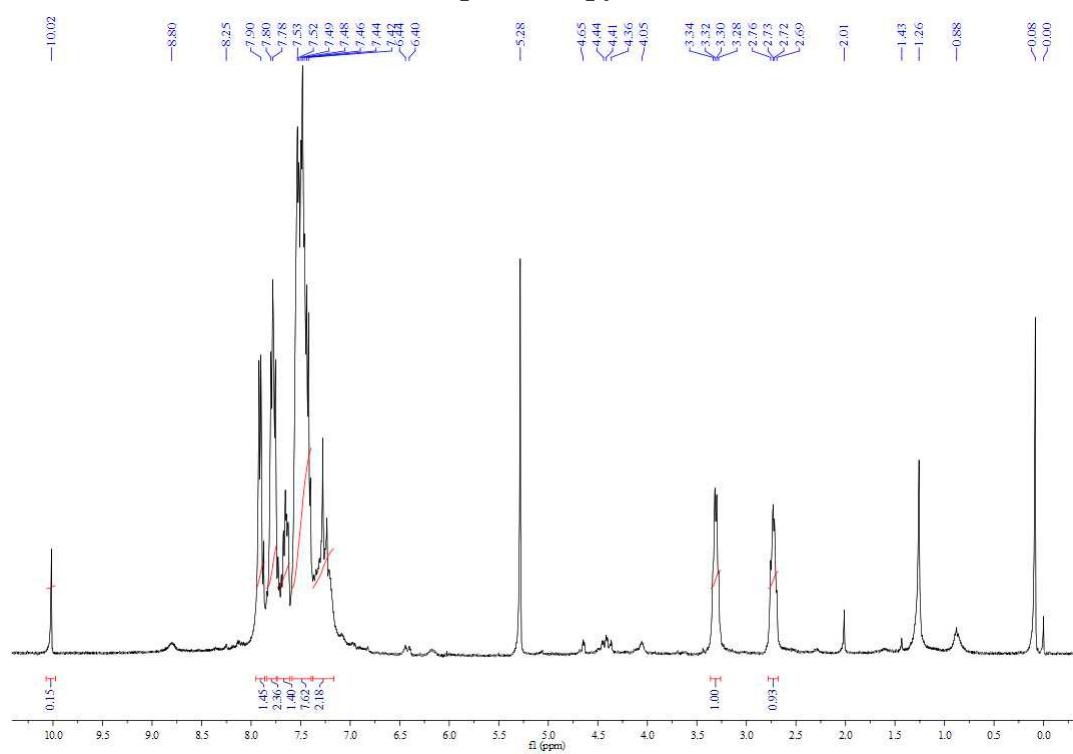

### Part 3. Selected $^{31}\text{P}$ , $^1\text{H}$ and $^{13}\text{C}$ NMR spectroscopy of 1, 2, 4, 5, 11, 12 and 13.

#### (*S<sub>P</sub>*)-Menthyl-1-hydroxy-3-phenylallyl phenylphosphinate, 2a, $^{31}\text{P}$ NMR spectroscopy

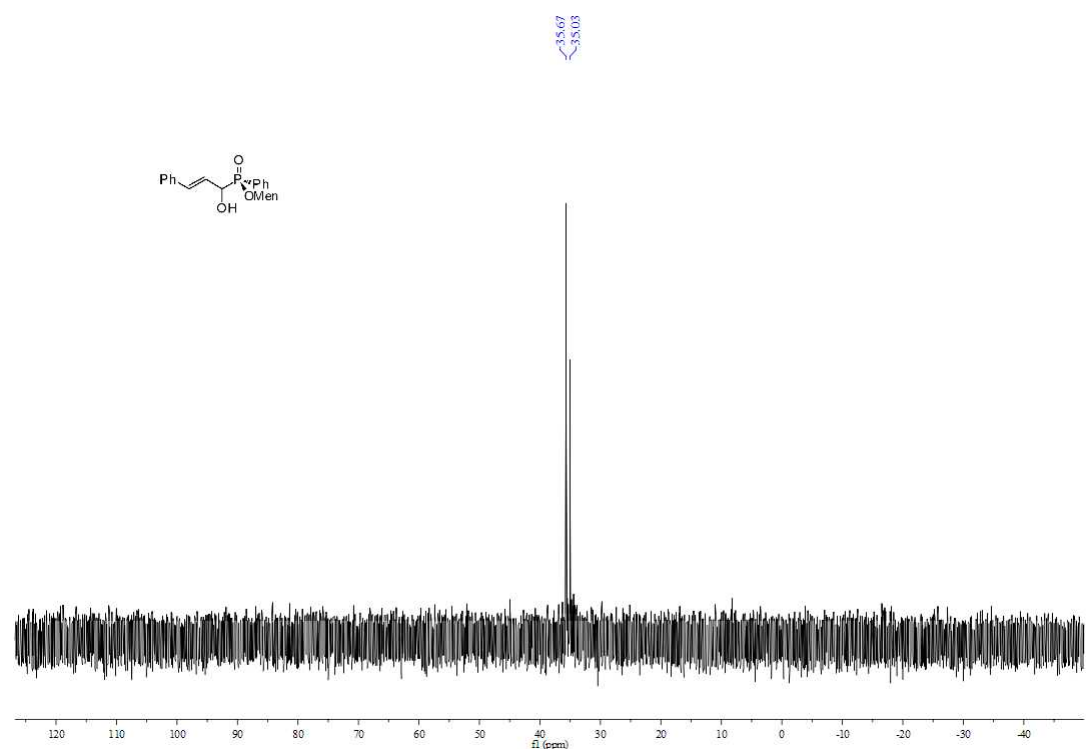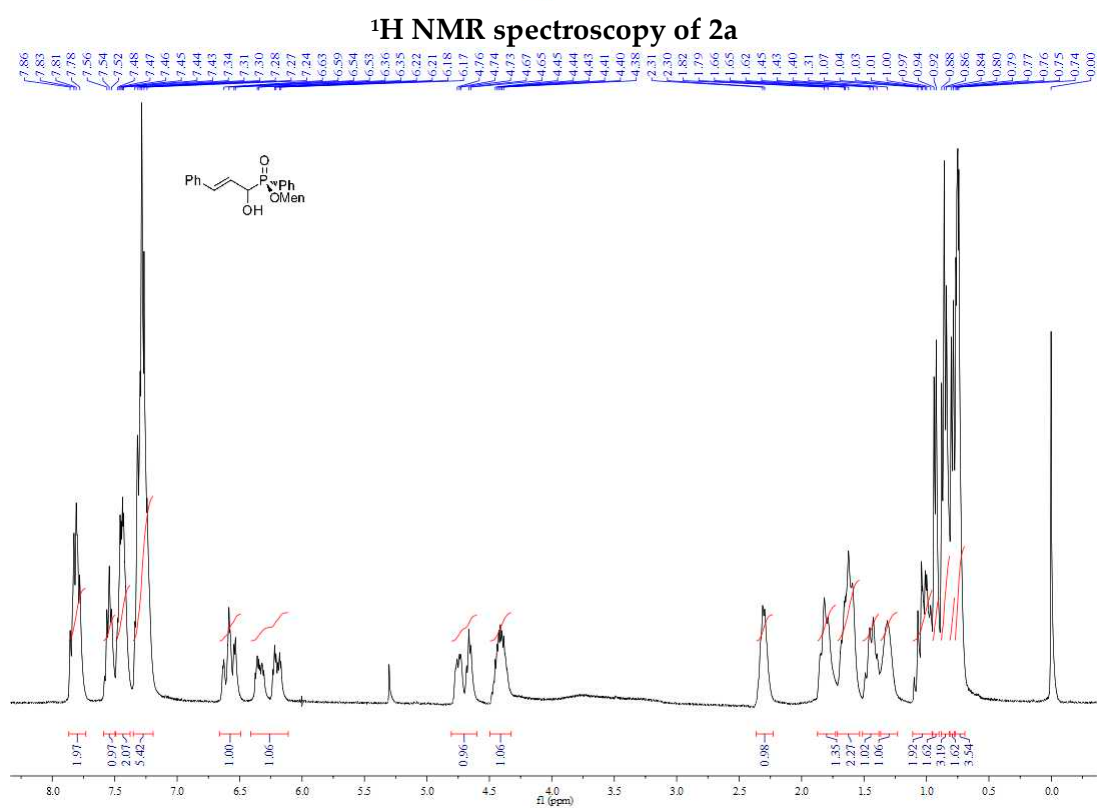

**Ethyl 1-hydroxy-3-phenylallyl phenylphosphinate, 2b,  $^{31}\text{P}$  NMR spectroscopy**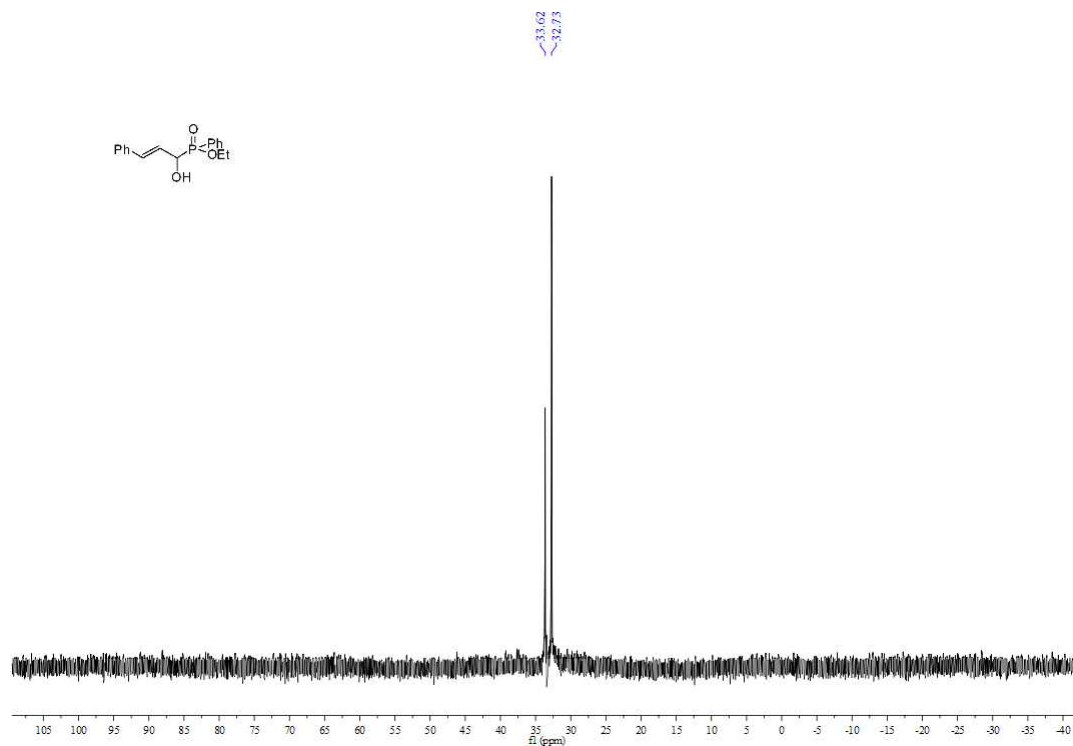 **$^1\text{H}$  NMR spectroscopy of 2b**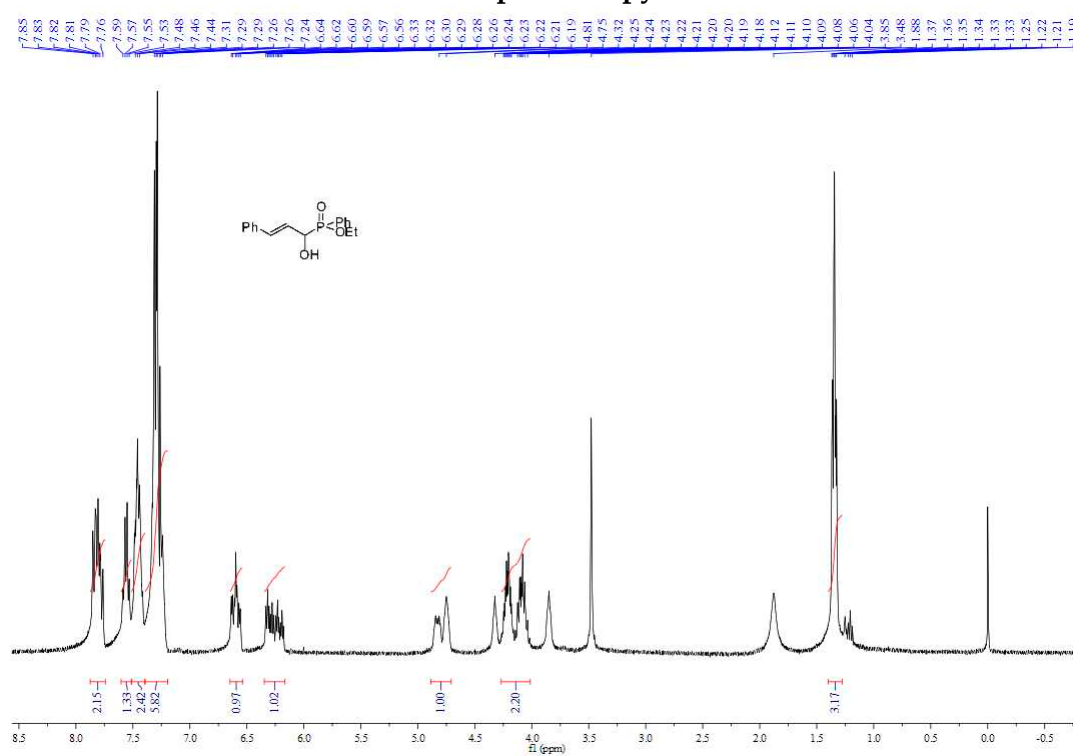

**Diethyl 1-hydroxy-3-phenylallylphosphonate, 2c,  $^{31}\text{P}$  NMR spectroscopy**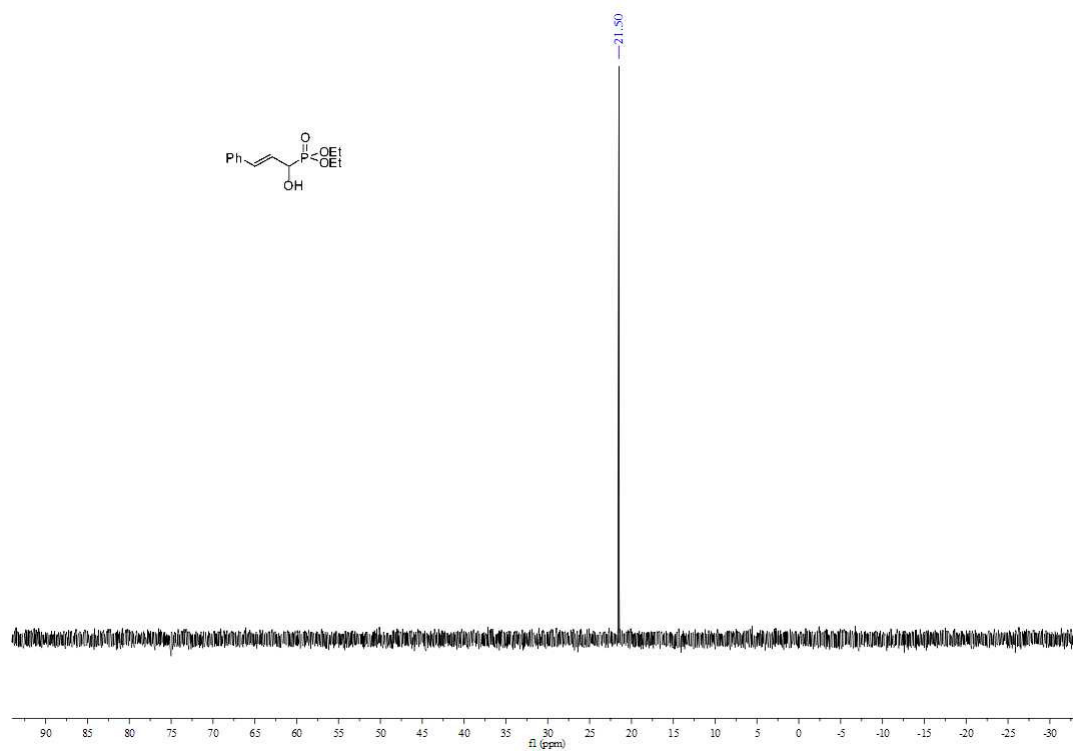 **$^1\text{H}$  NMR spectroscopy of 2c**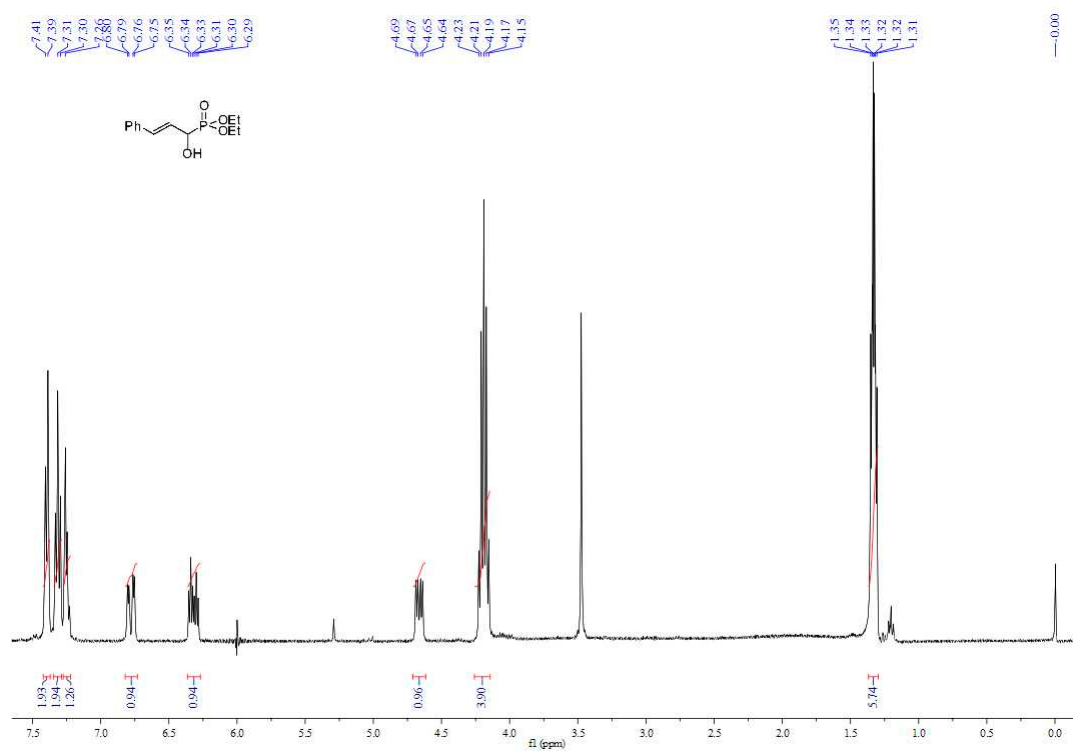

**Dimethyl 1-hydroxy-3-phenylallylphosphonate, 2d,  $^{31}\text{P}$  NMR spectroscopy**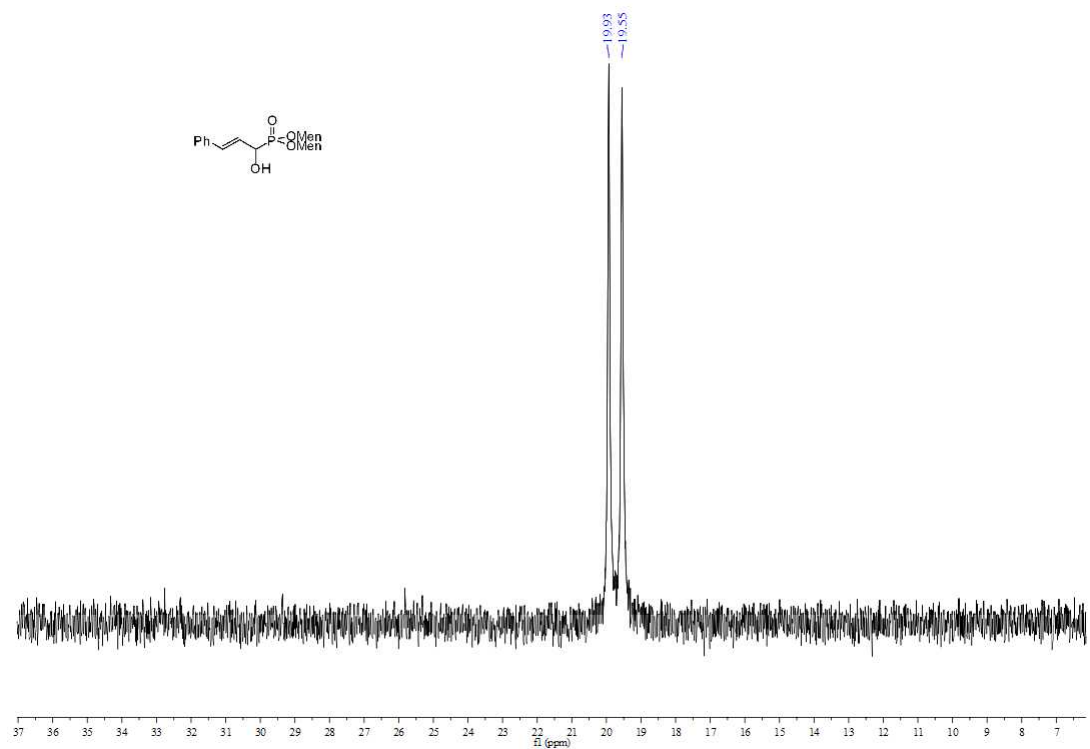 **$^1\text{H}$  NMR spectroscopy of 2d**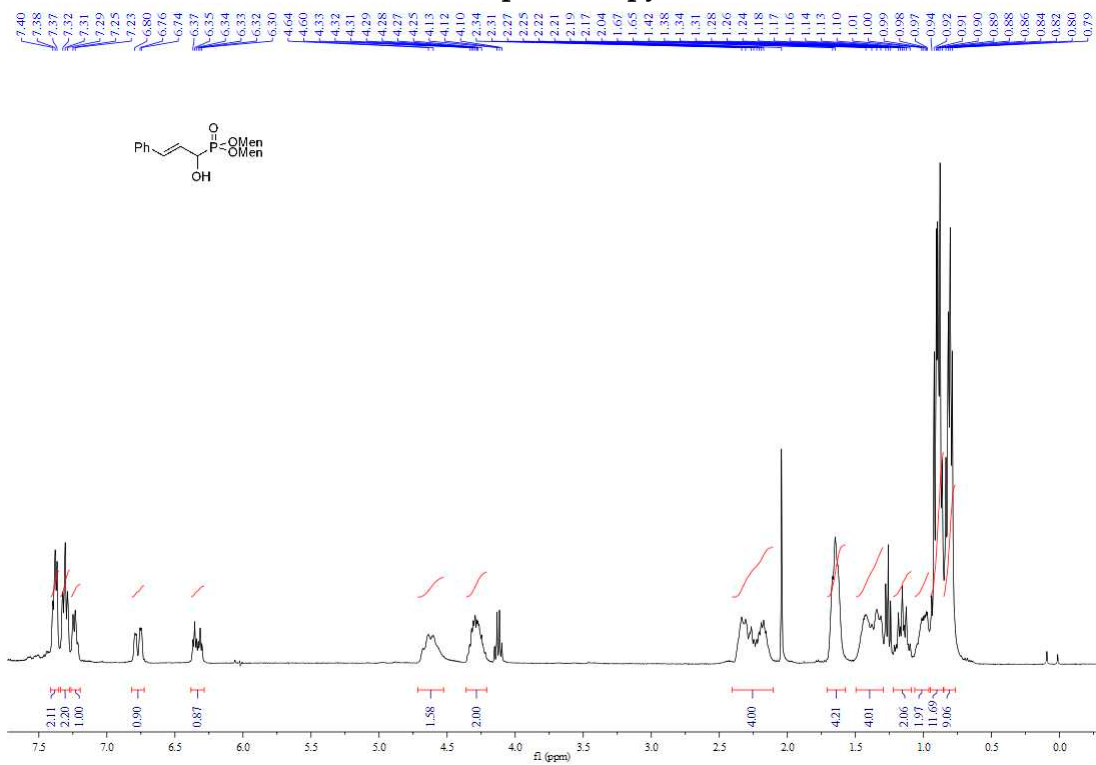

Diethyl 1-hydroxy-3-p-tolyl allylphosphonate, 2e,  $^{31}\text{P}$  NMR spectroscopy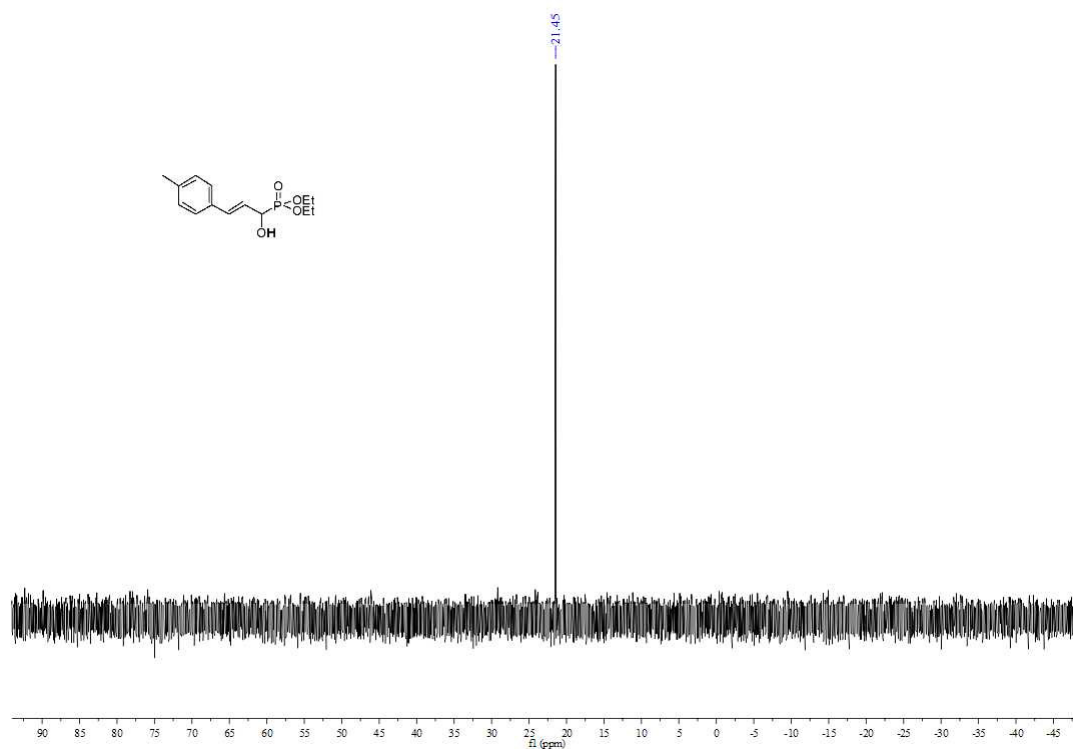 $^1\text{H}$  NMR spectroscopy of 2e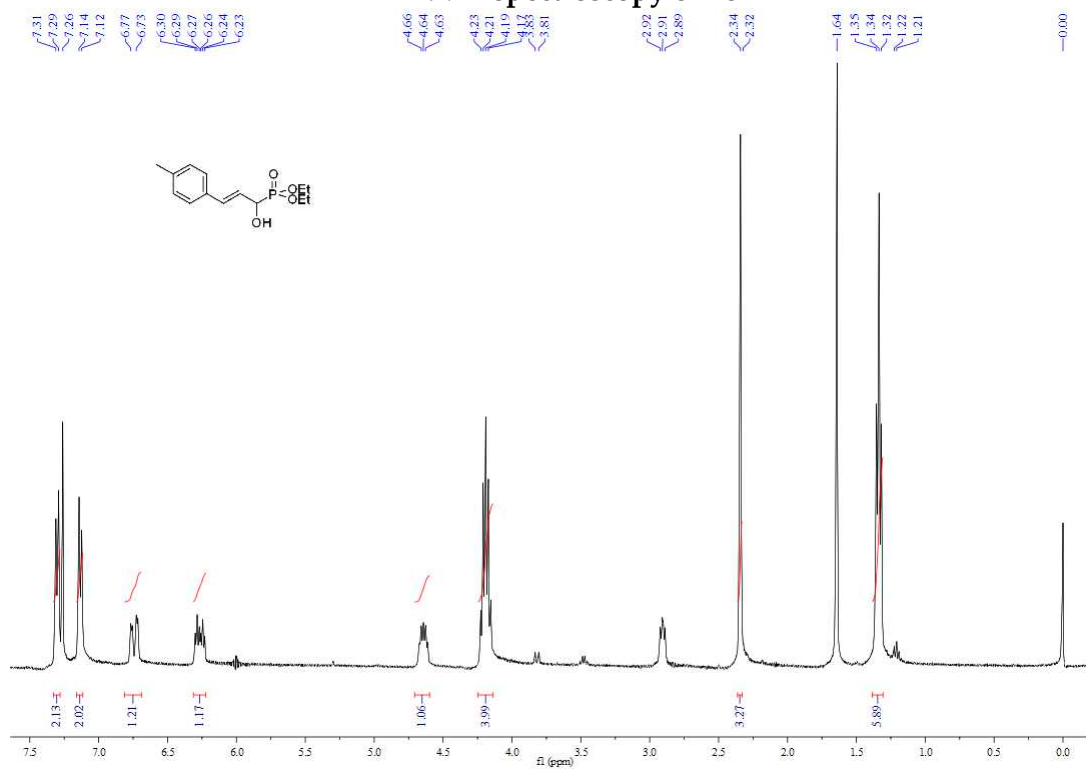

**Diphenyl 1-hydroxy-3-phenylallylphosphine oxide, 2f,  $^{31}\text{P}$  NMR spectroscopy**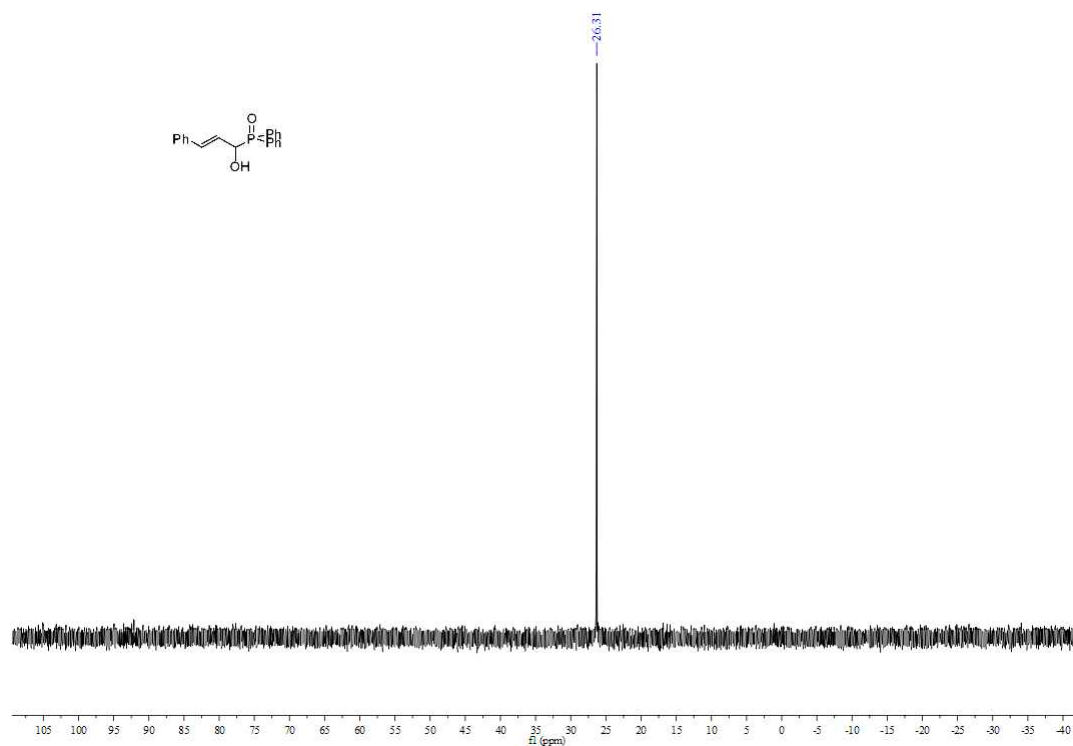 **$^1\text{H}$  NMR spectroscopy of 2f**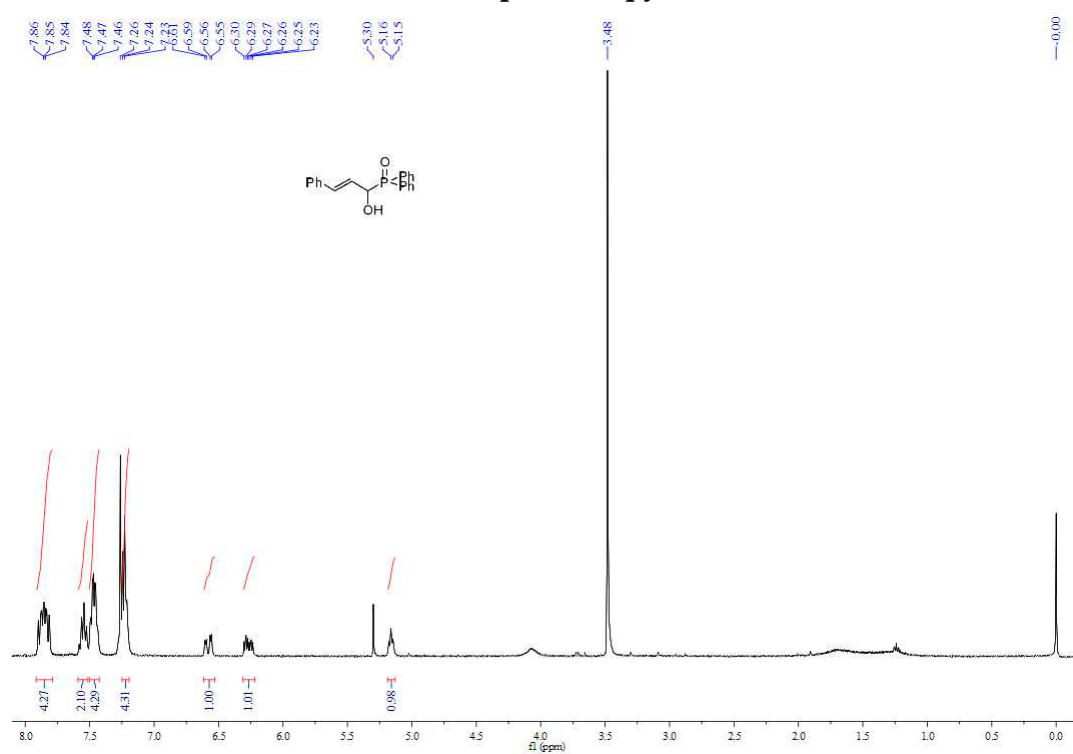

**(S<sub>P</sub>)-Menthyl 1-hydroxy-3-phenylallylphenylphosphine oxide, 2g, <sup>31</sup>P NMR spectroscopy**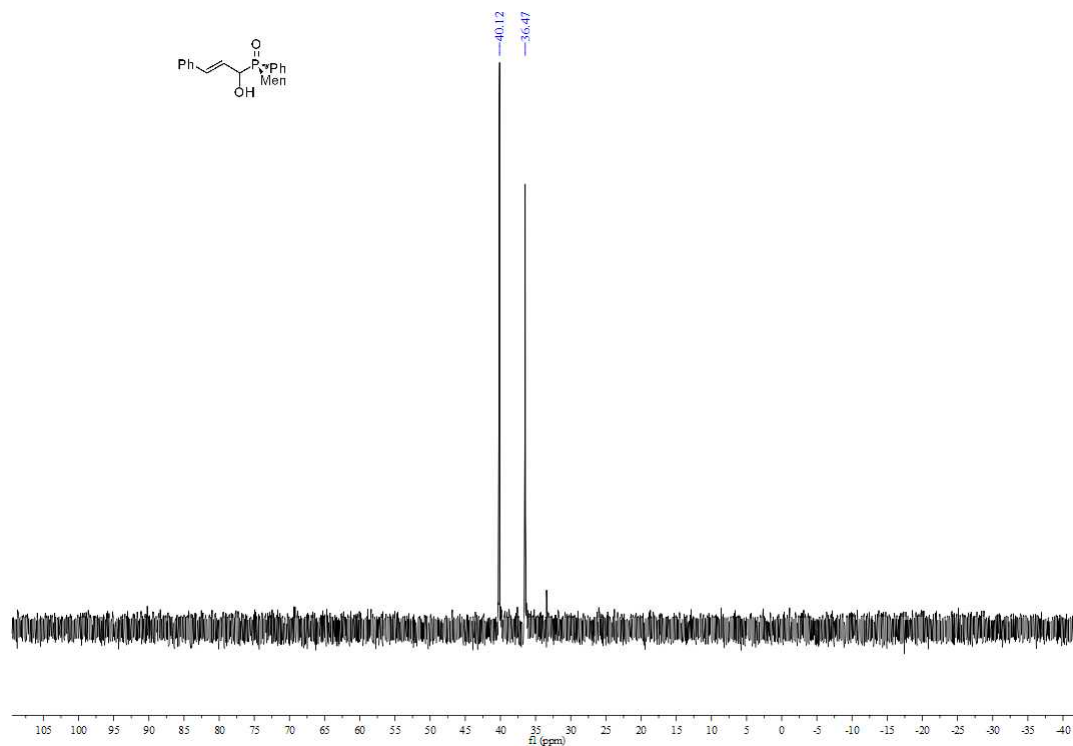**<sup>1</sup>H NMR spectroscopy of 2g**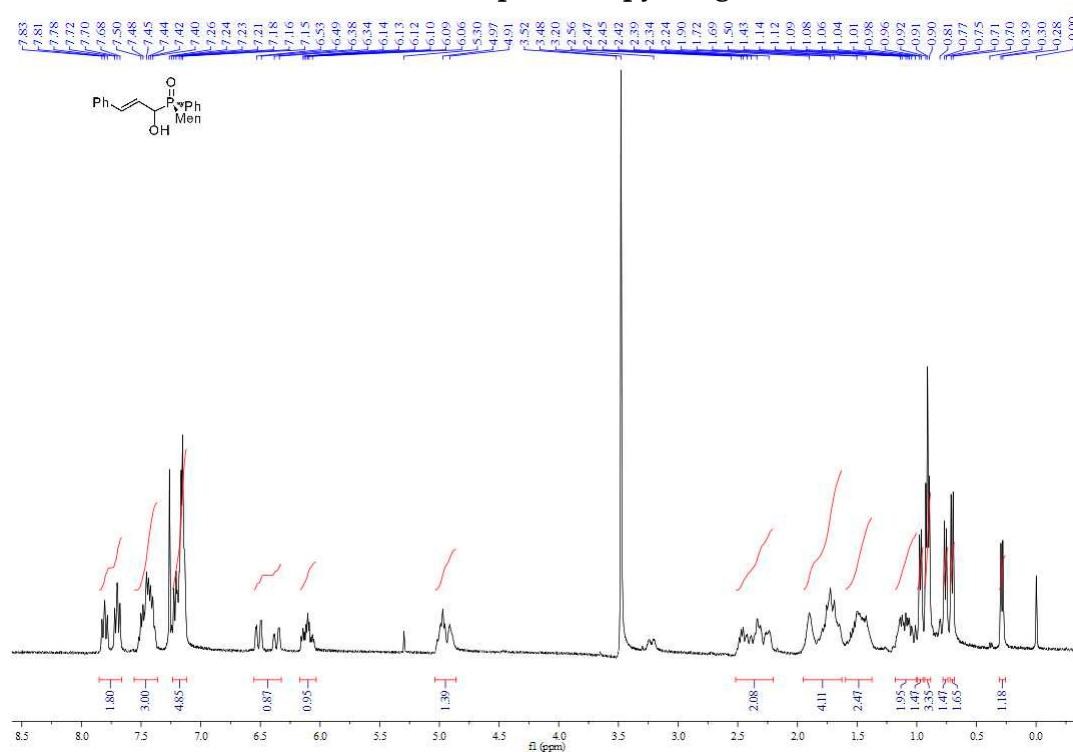

**(S<sub>P</sub>)-Menthyl 3-chloro-3-phenylprop-1-en-1-ylphenylphosphinate, 1a, <sup>31</sup>P NMR spectroscopy**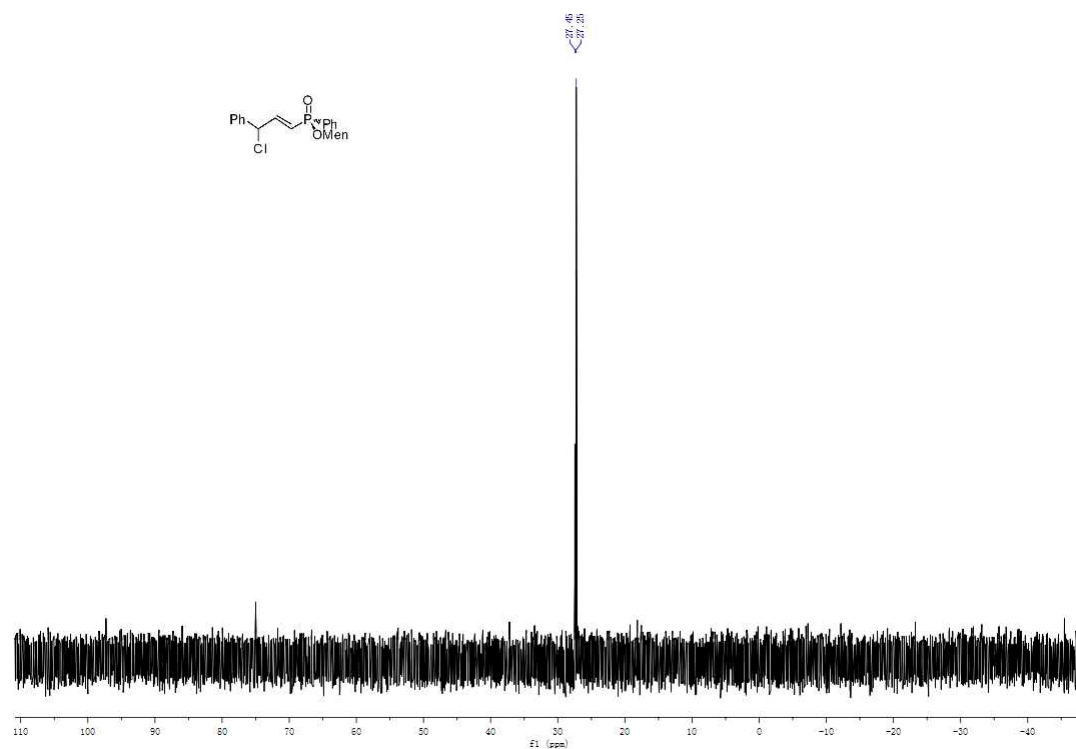**<sup>1</sup>H NMR spectroscopy of 1a**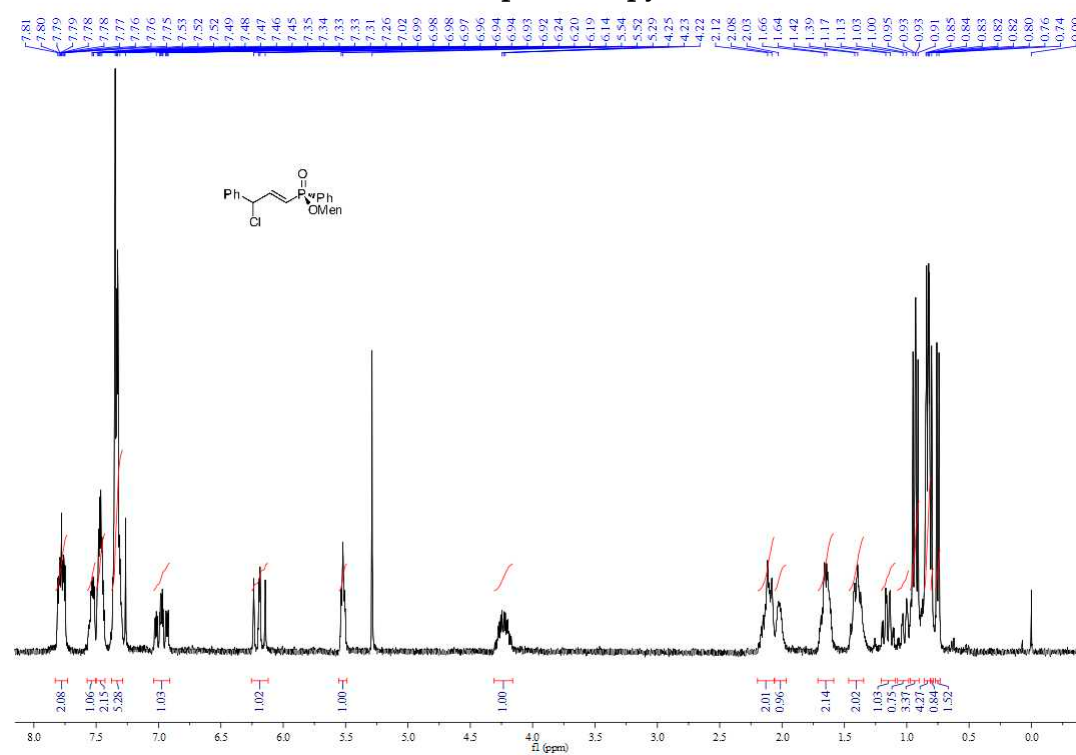

**Ethyl 3-chloro-3-phenylprop-1-en-1-ylphenylphosphinate, 1b,  $^{31}\text{P}$  NMR spectroscopy**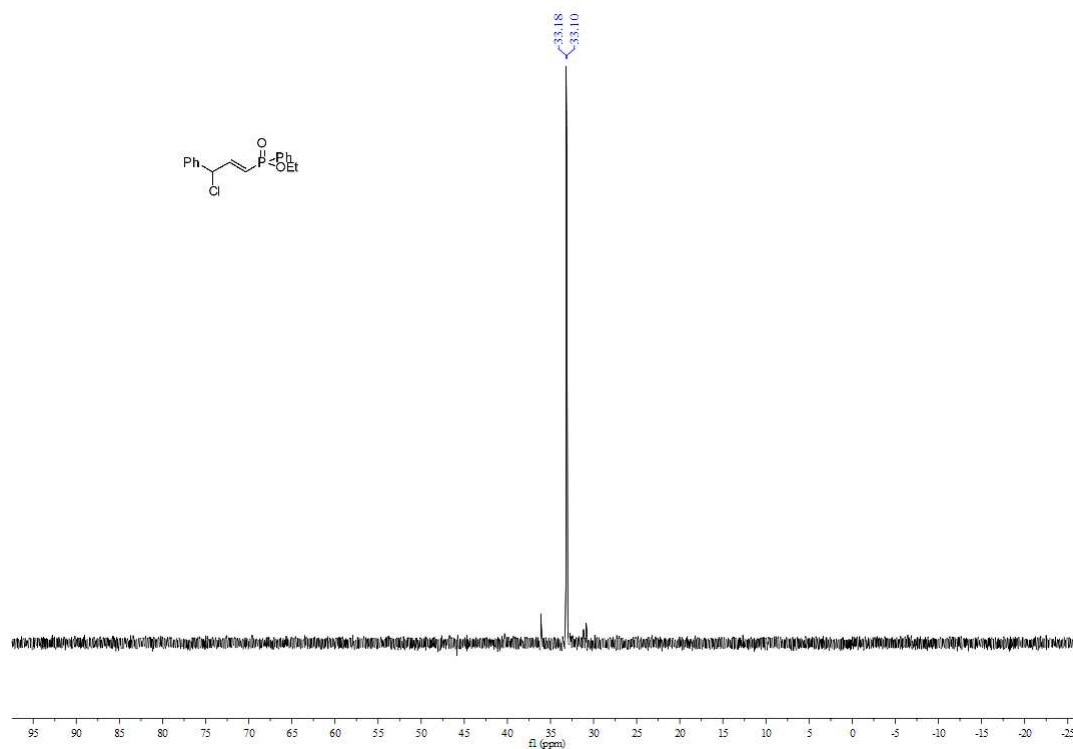 **$^1\text{H}$  NMR spectroscopy of 1b**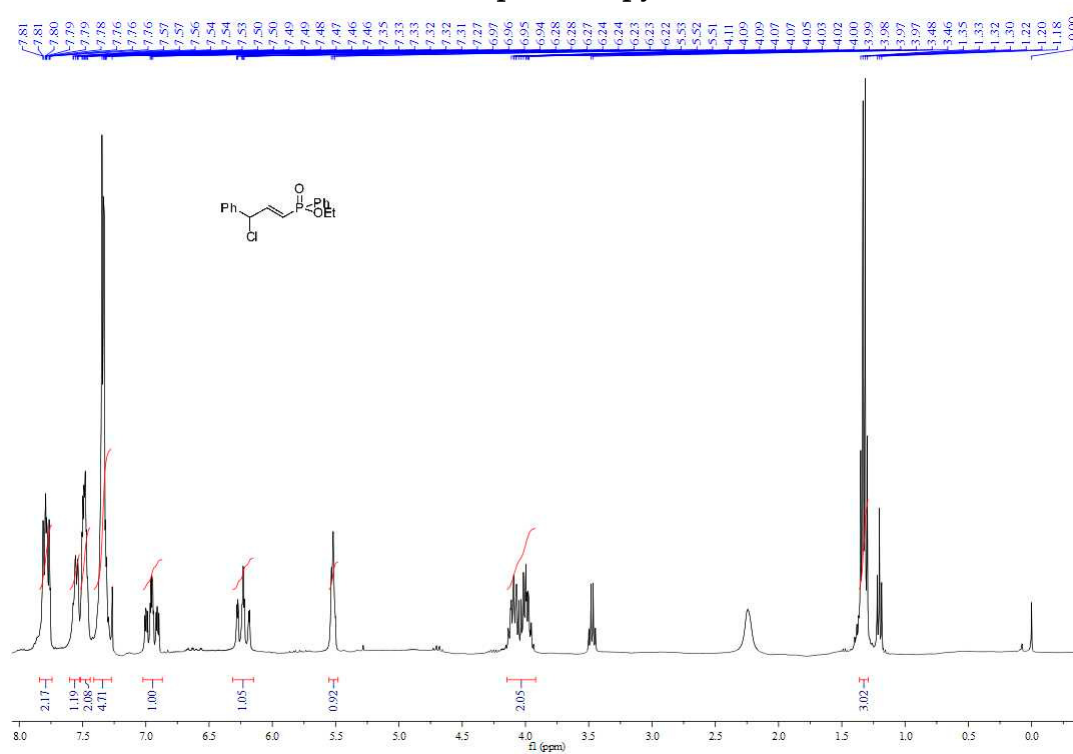

Diethyl 3-chloro-3-phenylprop-1-en-1-ylphosphonate, 1c,  $^{31}\text{P}$  NMR spectroscopy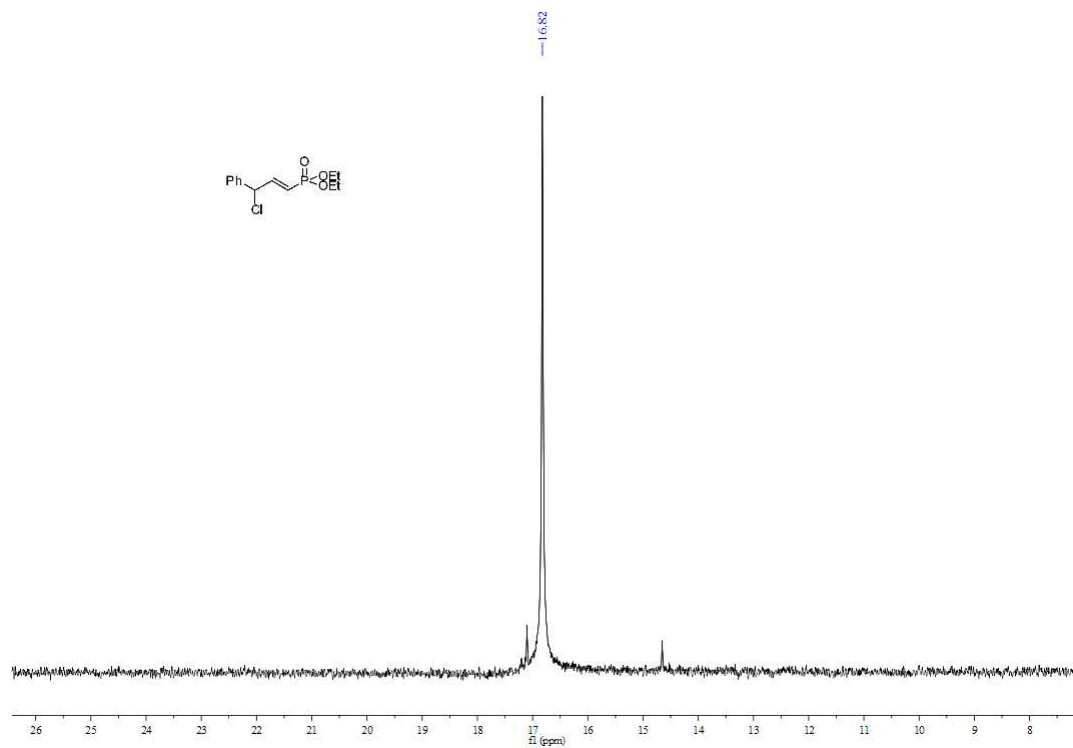 $^1\text{H}$  NMR spectroscopy of 1c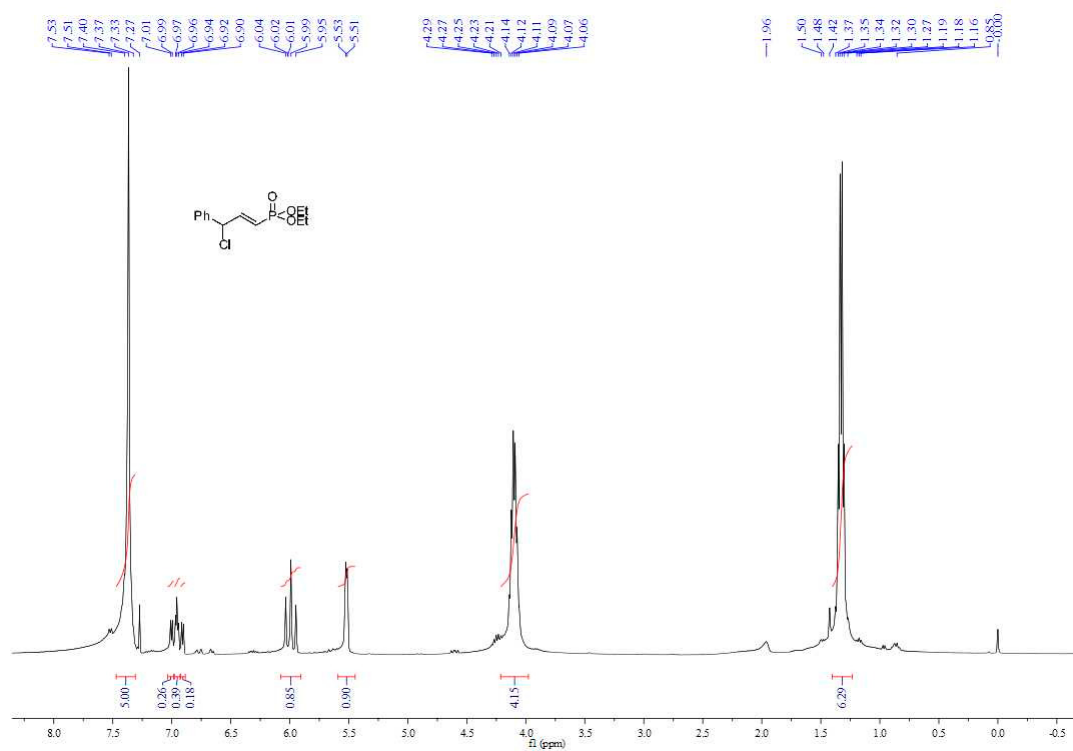

**$^{13}\text{C}$  NMR spectroscopy of 1c**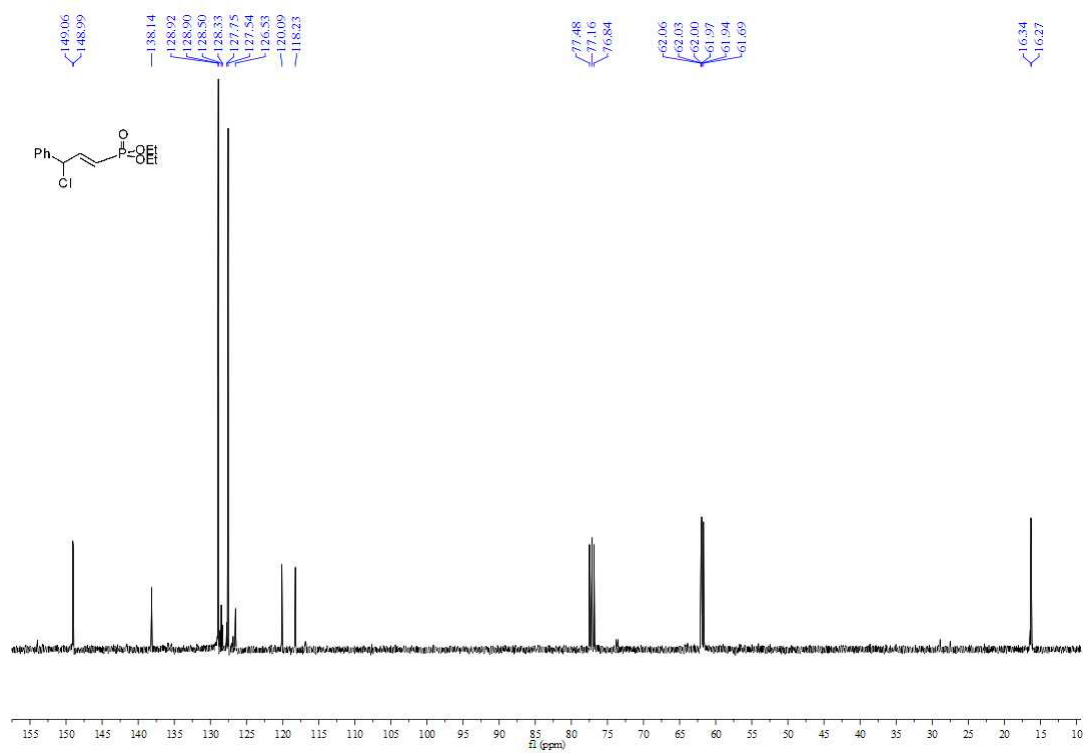**Dimethyl 3-chloro-3-phenylprop-1-en-1-ylphosphonate, 1d,  $^{31}\text{P}$  NMR spectroscopy**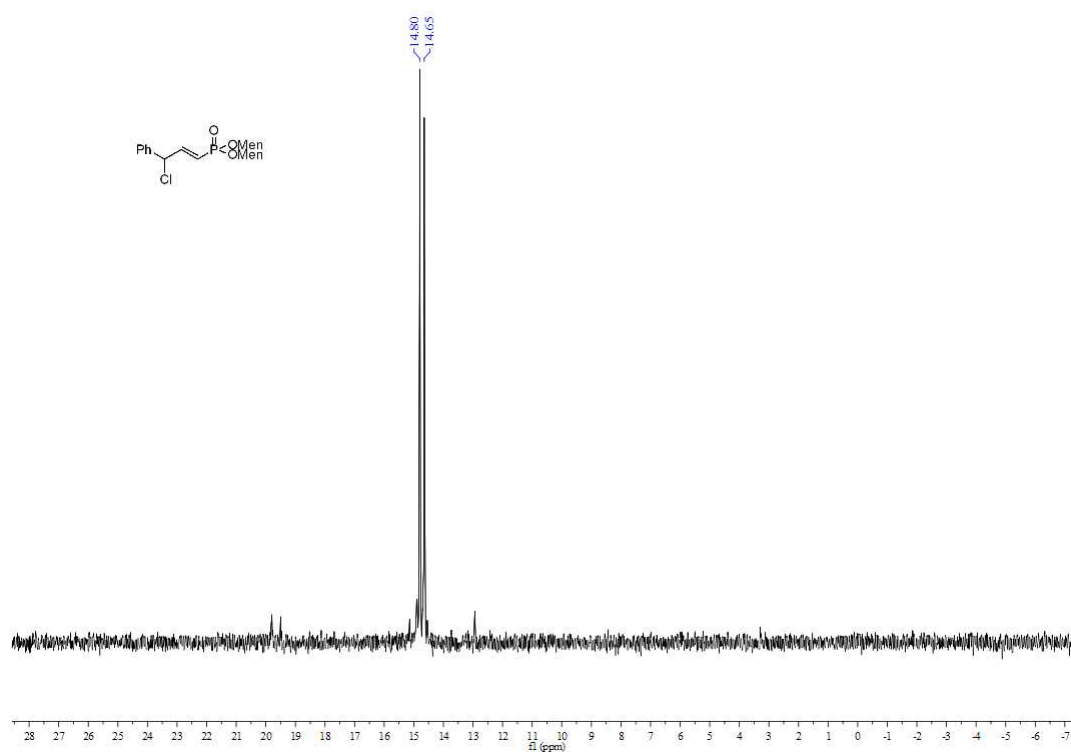

**<sup>1</sup>H NMR spectroscopy of 1d**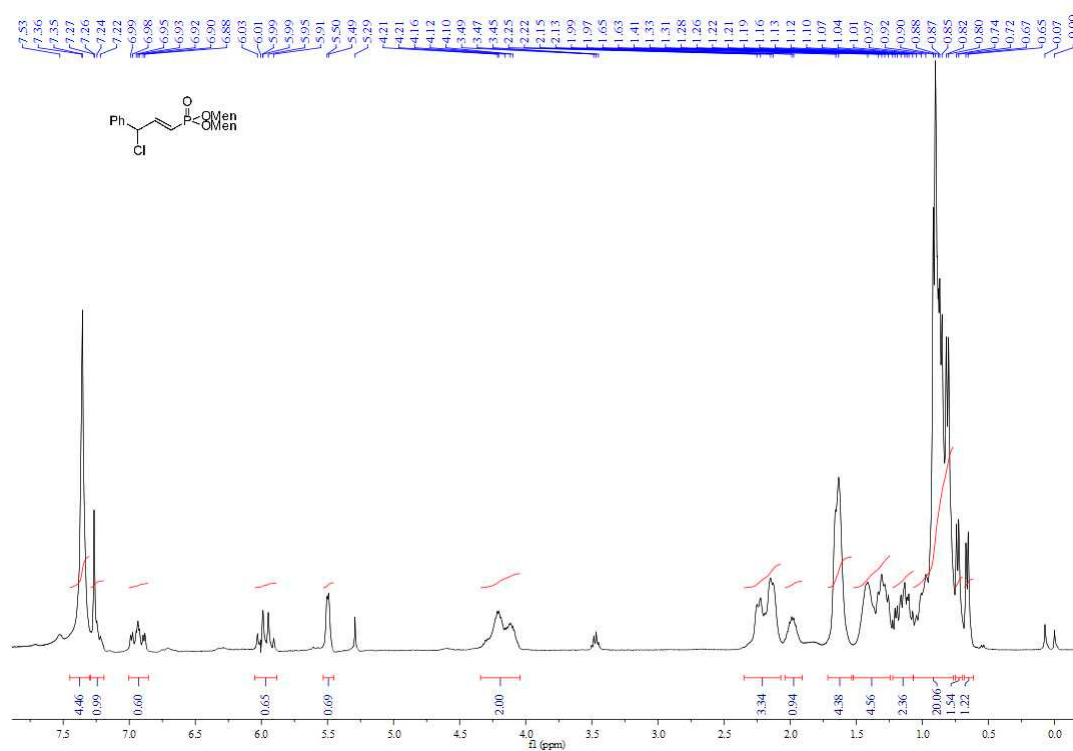**<sup>13</sup>C NMR spectroscopy of 1d**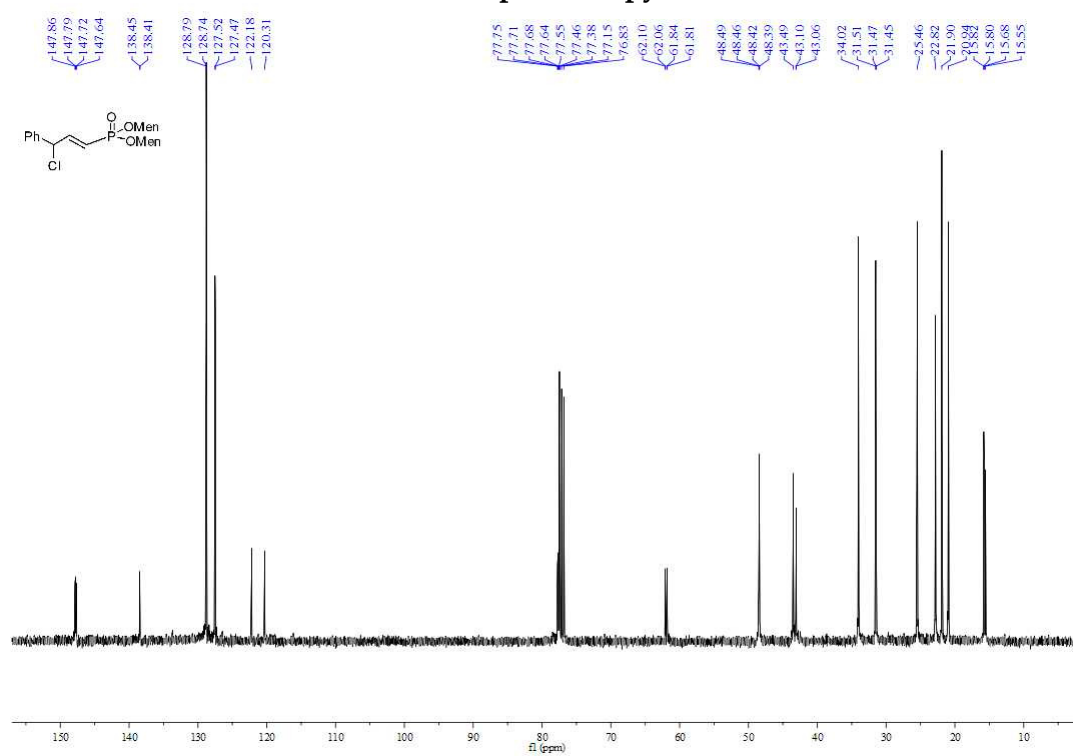

Diethyl 3-chloro-3-p-tolylprop-1-en-1-ylphosphonate, 1e,  $^{31}\text{P}$  NMR spectroscopy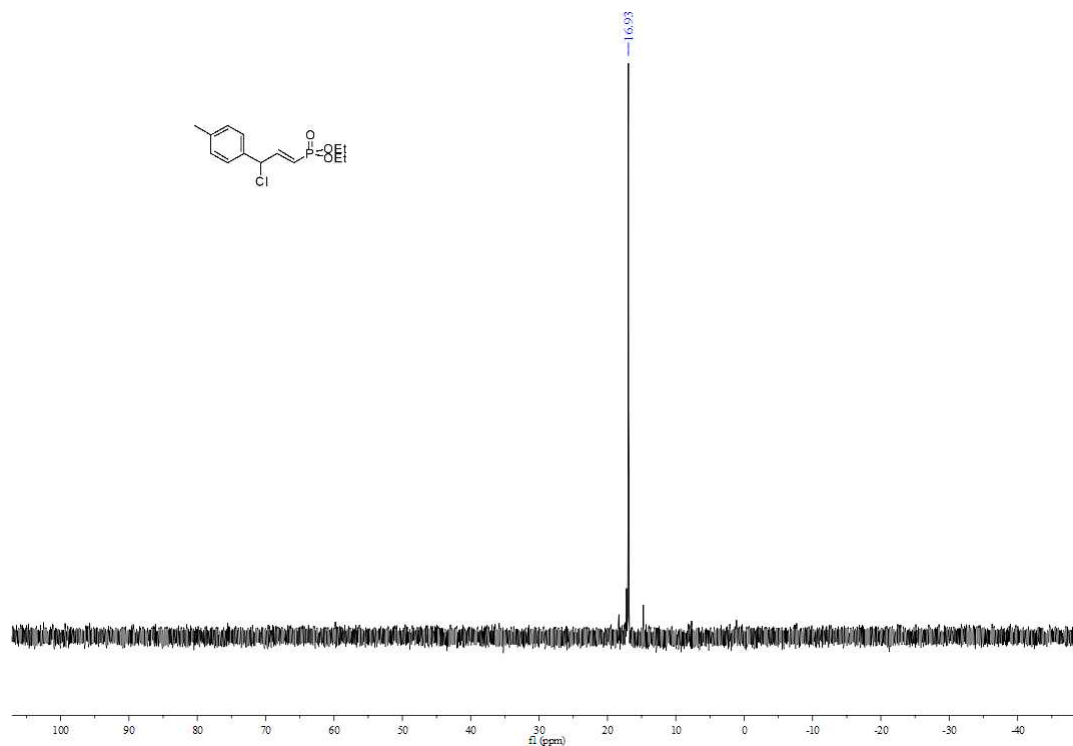 $^1\text{H}$  NMR spectroscopy of 1e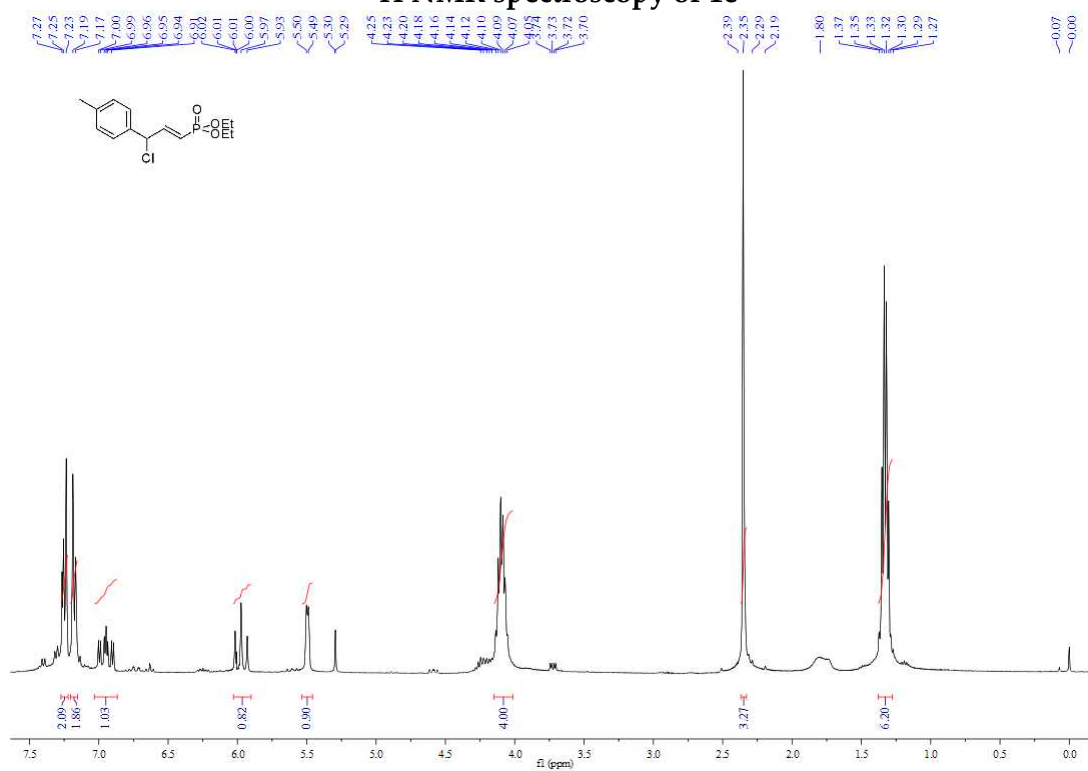

**<sup>13</sup>C NMR spectroscopy of 1e**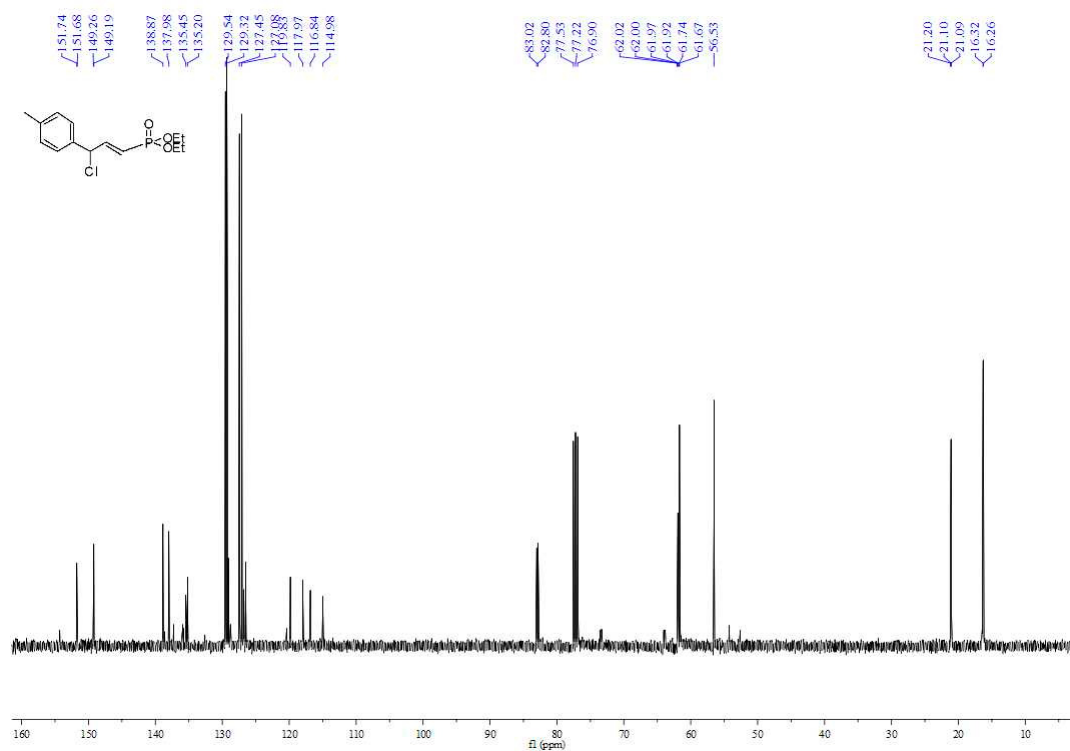**Diphenyl 3-chloro-3-phenylprop-1-en-1-ylphosphine oxide, 1f, <sup>31</sup>P NMR spectroscopy**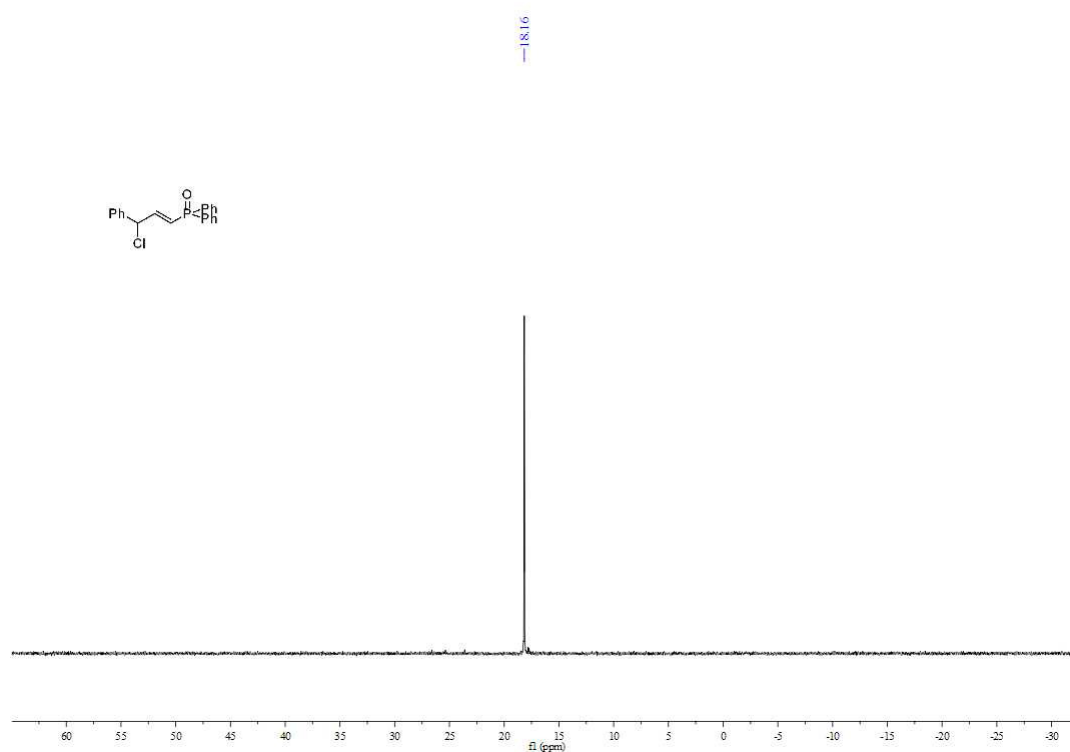

<sup>1</sup>H NMR spectroscopy of 1f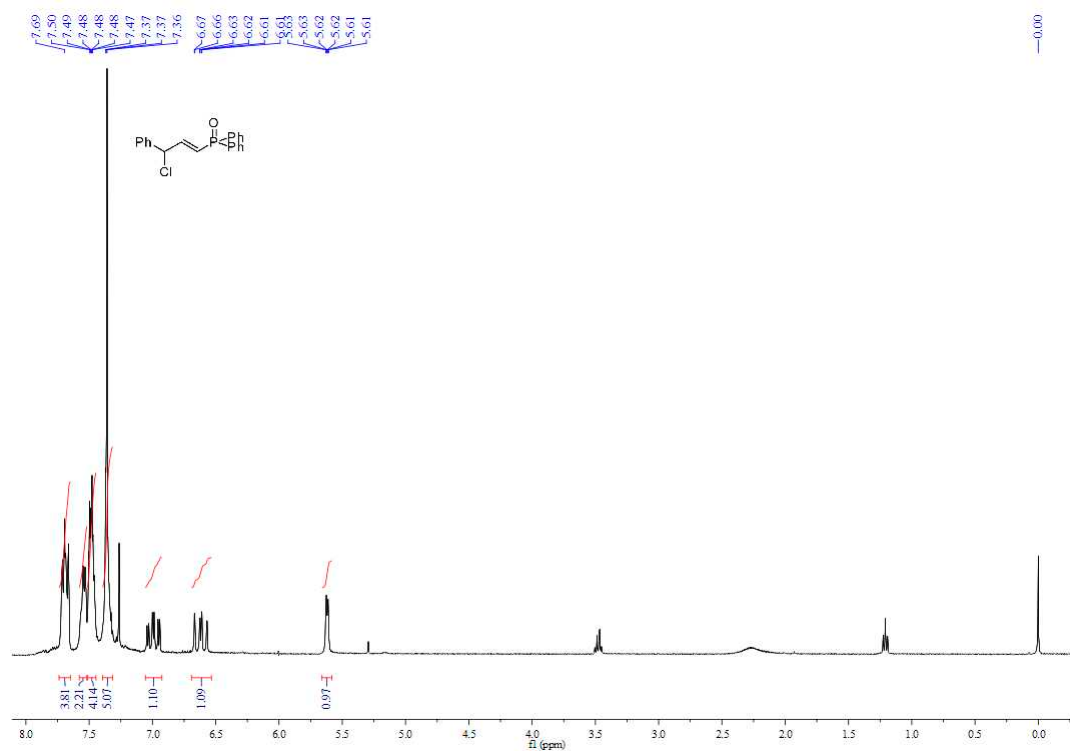<sup>13</sup>C NMR spectroscopy of 1f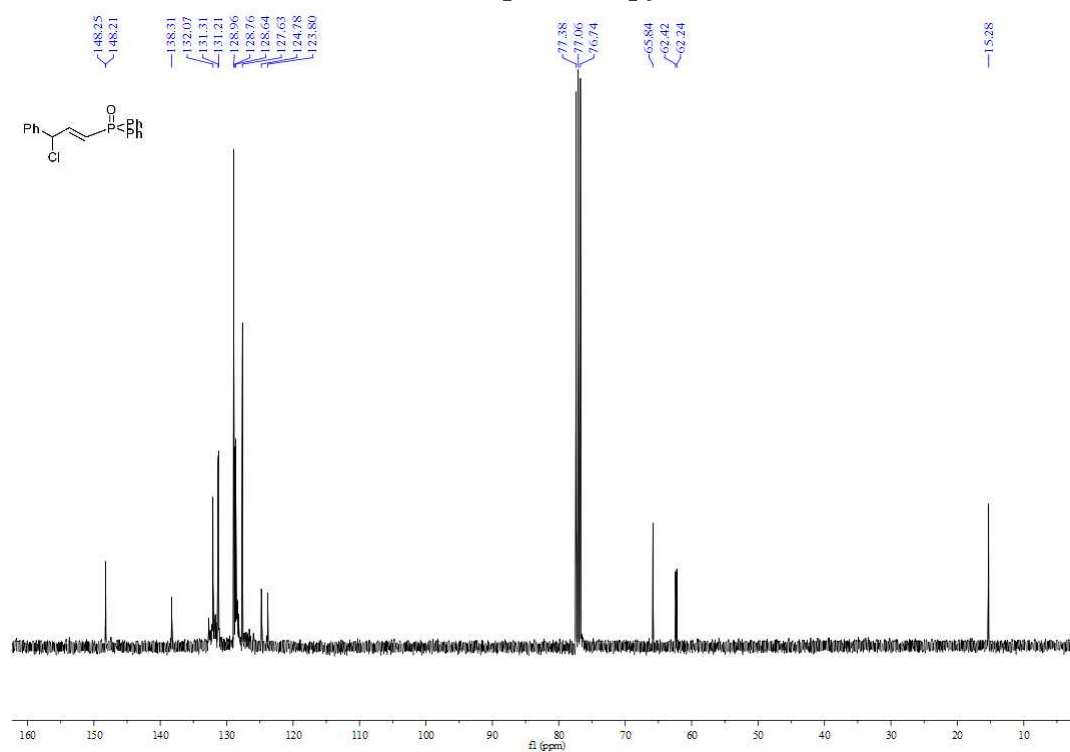

**(S<sub>P</sub>)-Menthyl-3-chloro-3-phenylprop-1-en-1-yl phenylphosphine oxide, 1g, <sup>31</sup>P NMR spectroscopy**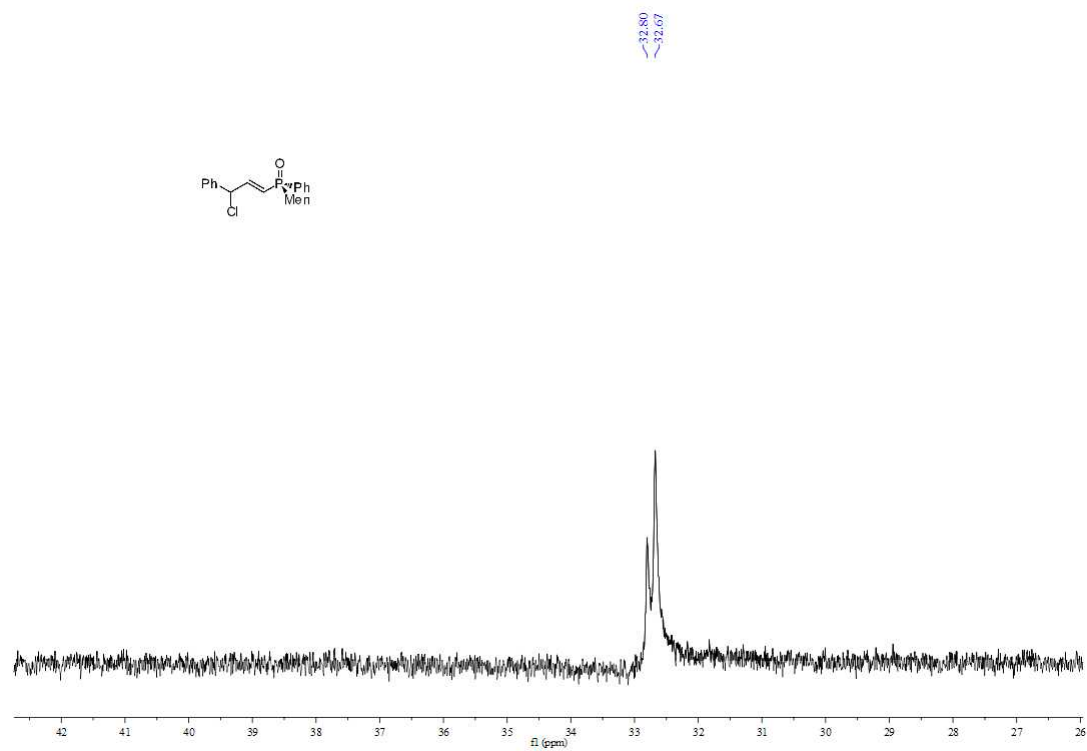**<sup>1</sup>H NMR spectroscopy of 1g**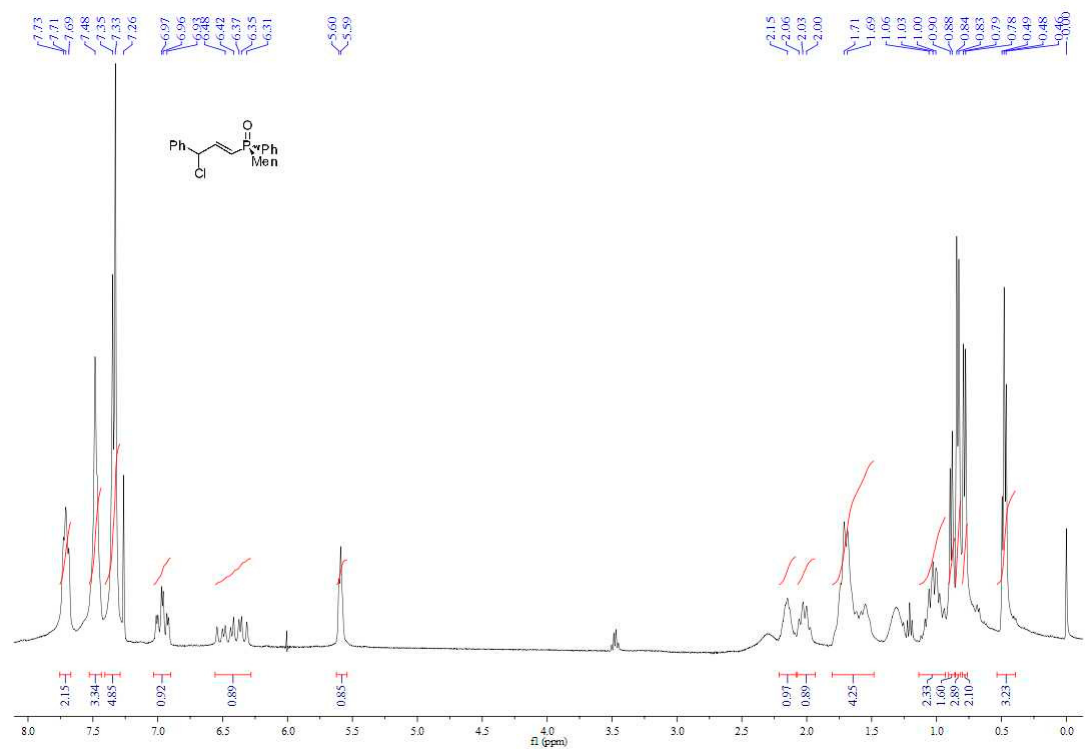

<sup>13</sup>C NMR spectroscopy of 1g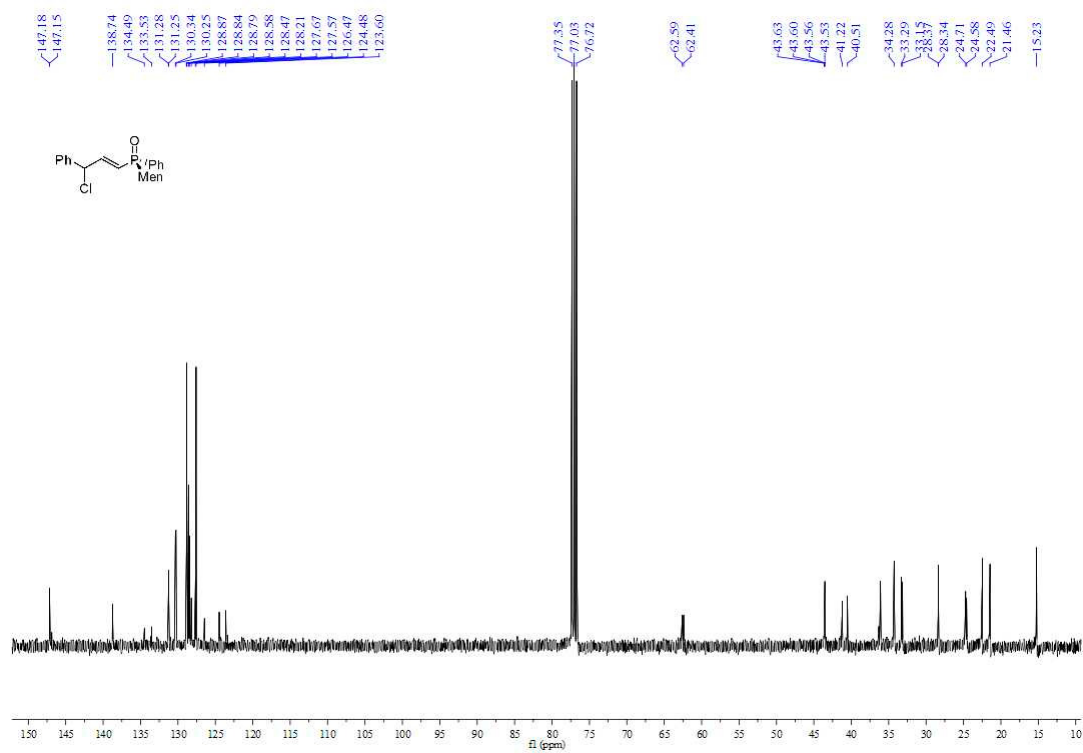<sup>31</sup>P NMR spectroscopy of 4g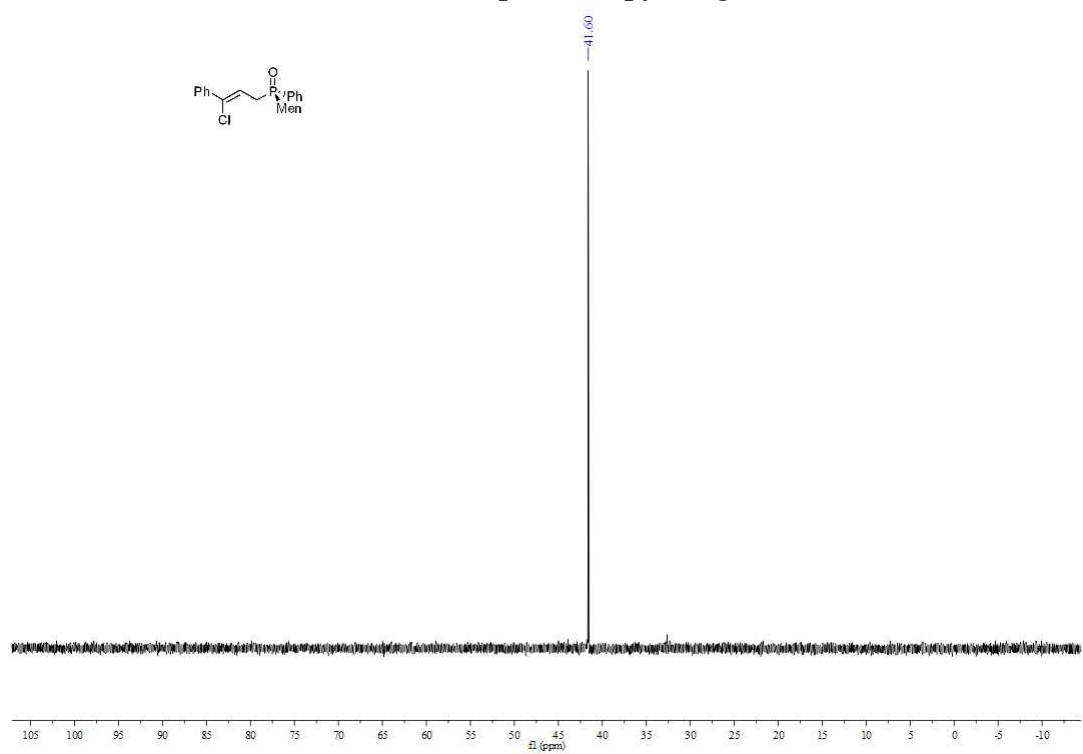

<sup>1</sup>H NMR spectroscopy of 4g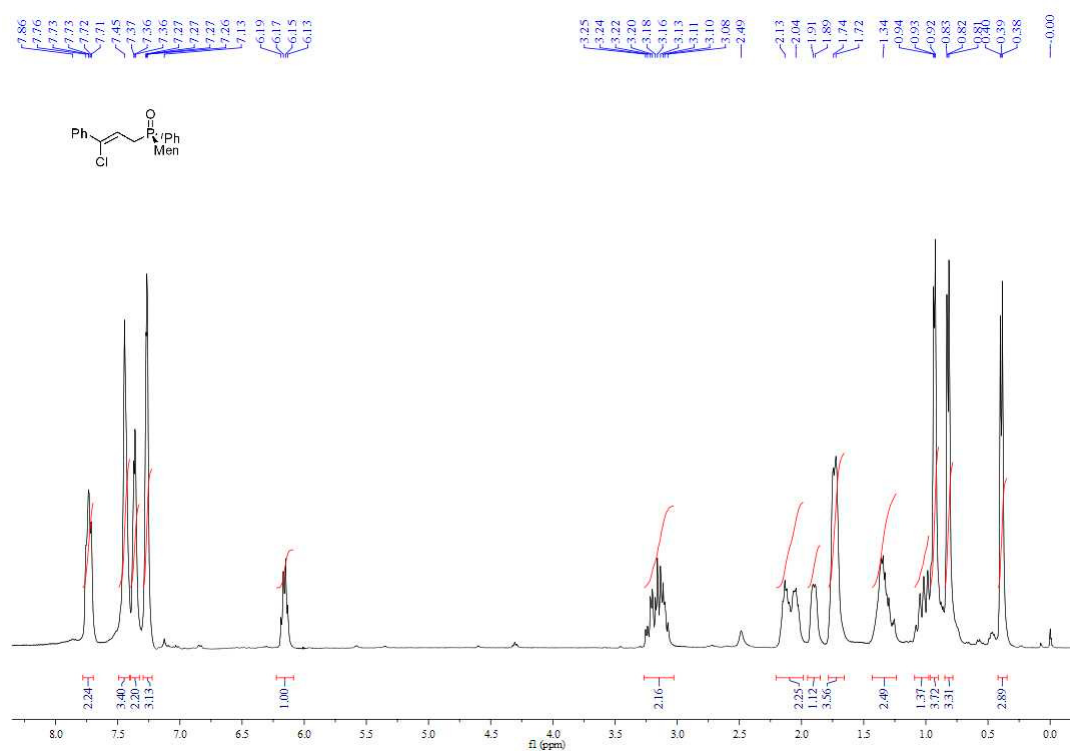<sup>13</sup>C NMR spectroscopy of 4g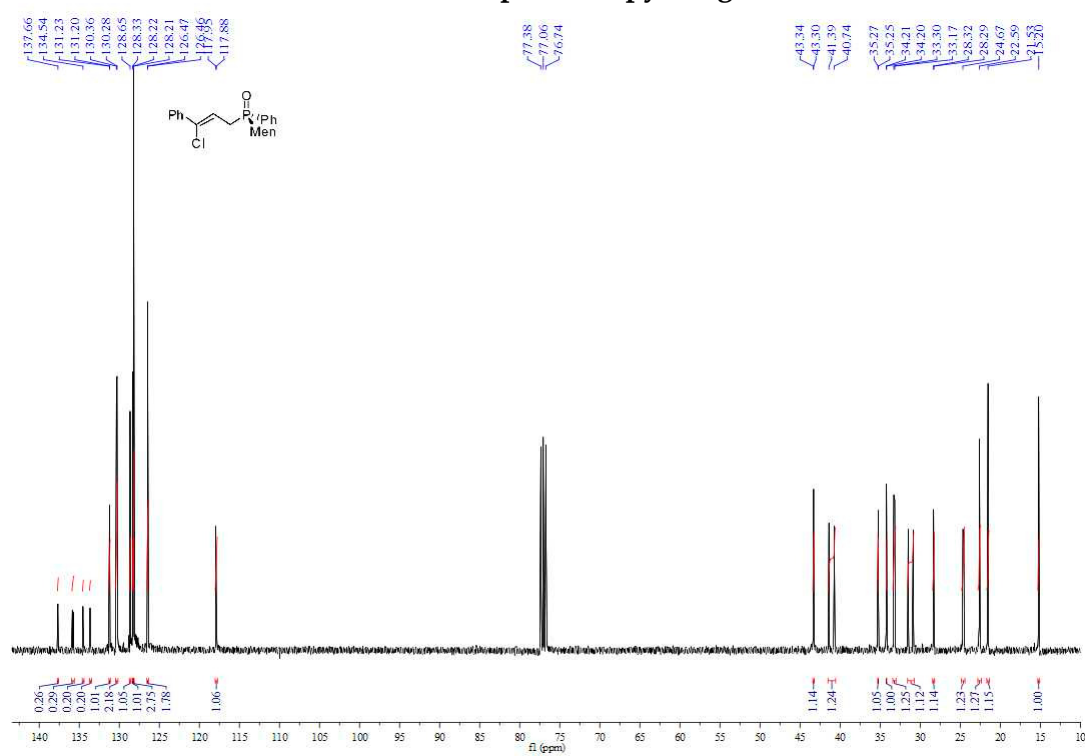

**Dimethyl 1-chloro-3-phenylprop-1-en-1-ylphosphonate, 4d',  $^{31}\text{P}$  NMR spectroscopy**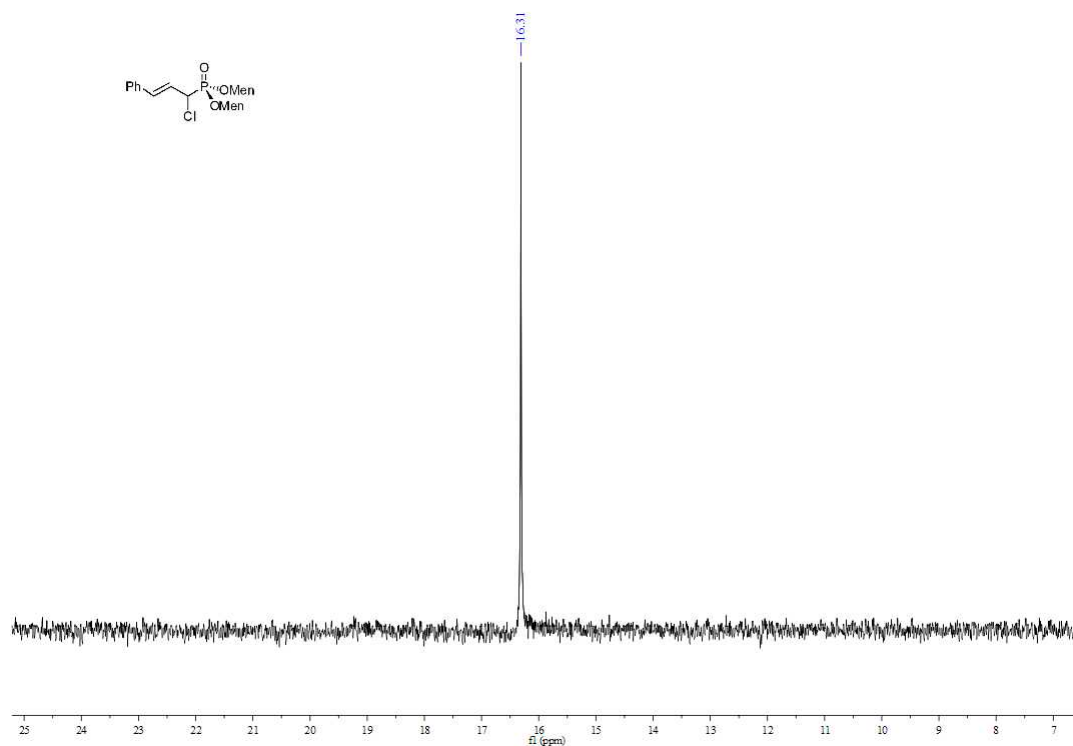 **$^1\text{H}$  NMR spectroscopy of 4d'**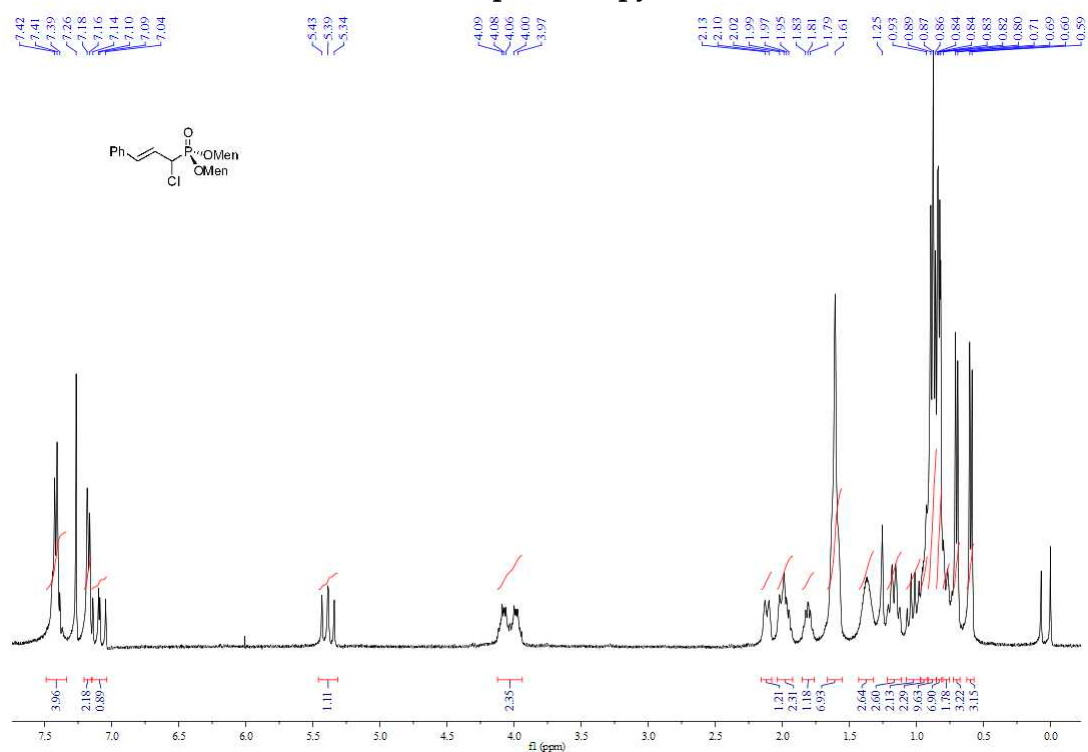

## gCOSY NMR spectroscopy of 4d'

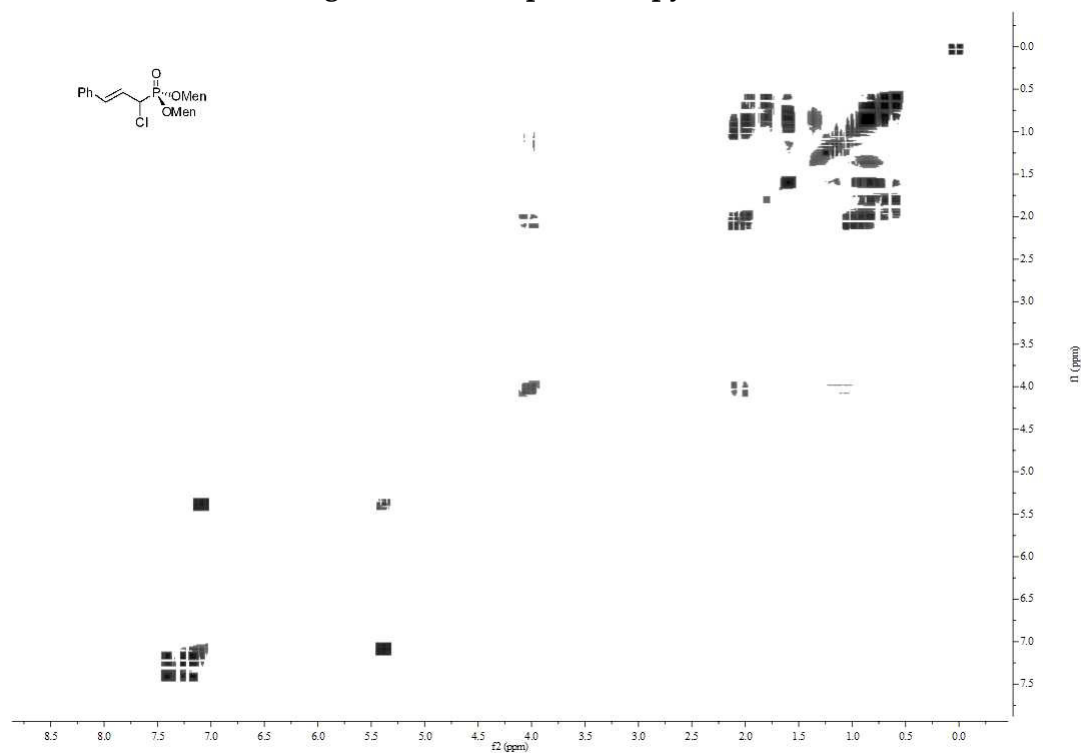 $^{13}\text{C}$  NMR spectroscopy of 4d'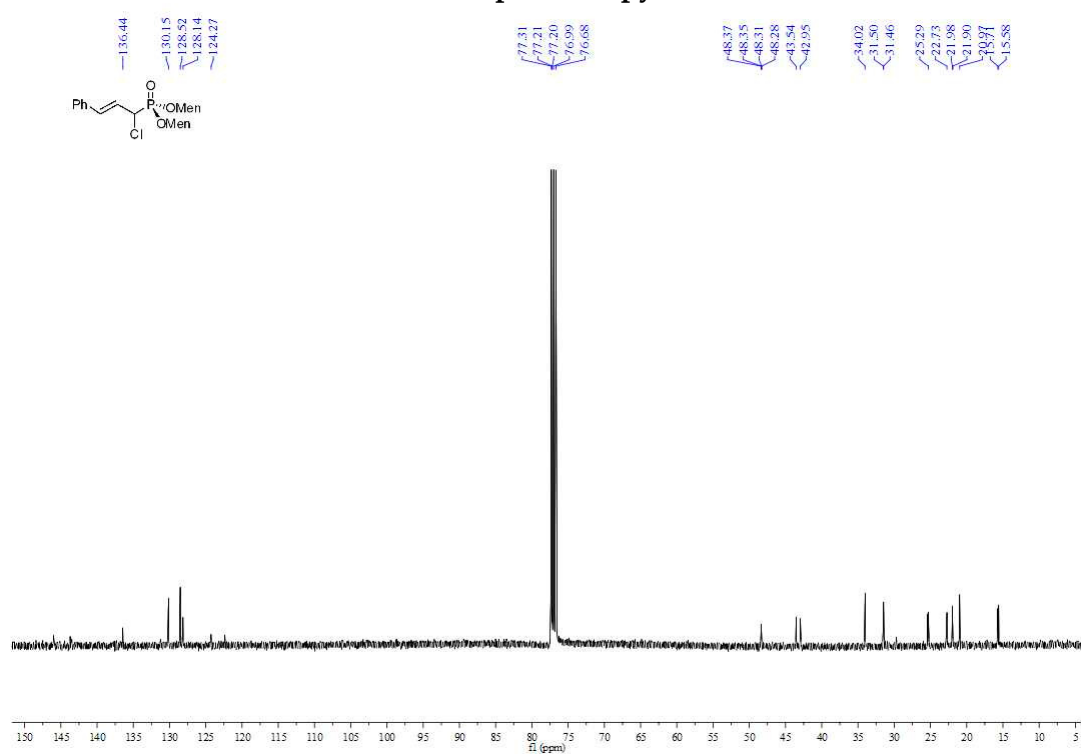

**(S<sub>P</sub>)-Menthyl 3-oxo-3-phenylpropyl phenylphosphinate, 5a, <sup>31</sup>P NMR spectroscopy**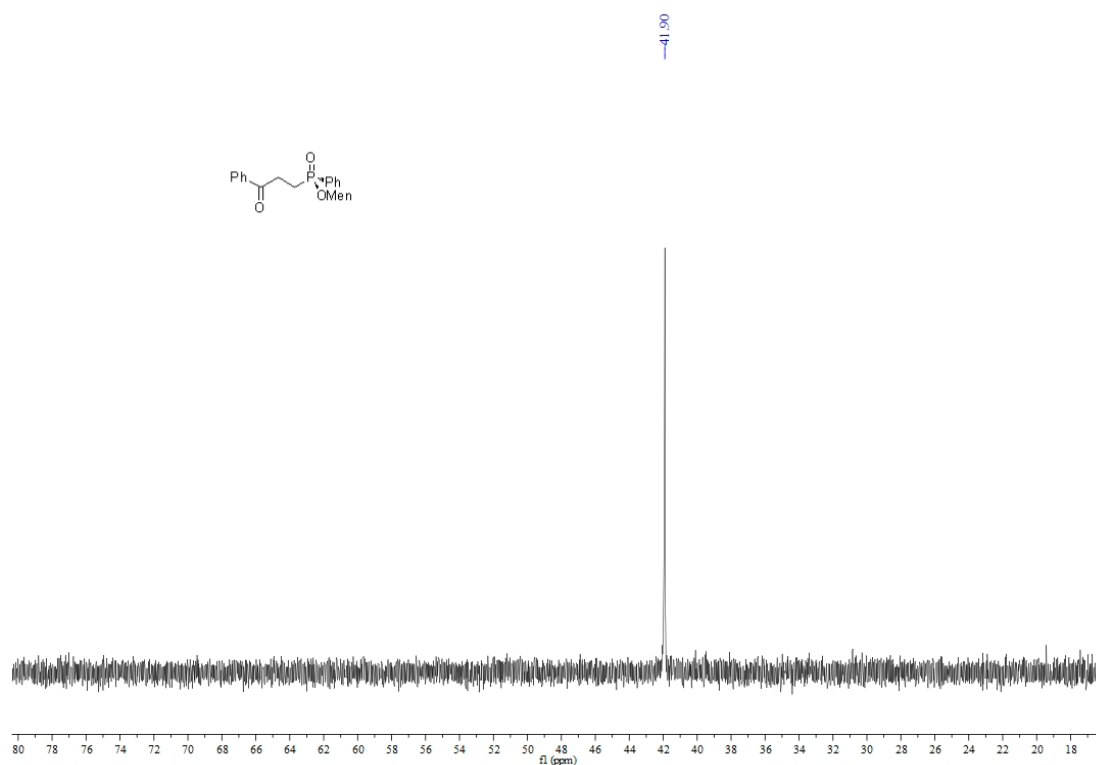**<sup>1</sup>H NMR spectroscopy of 5a**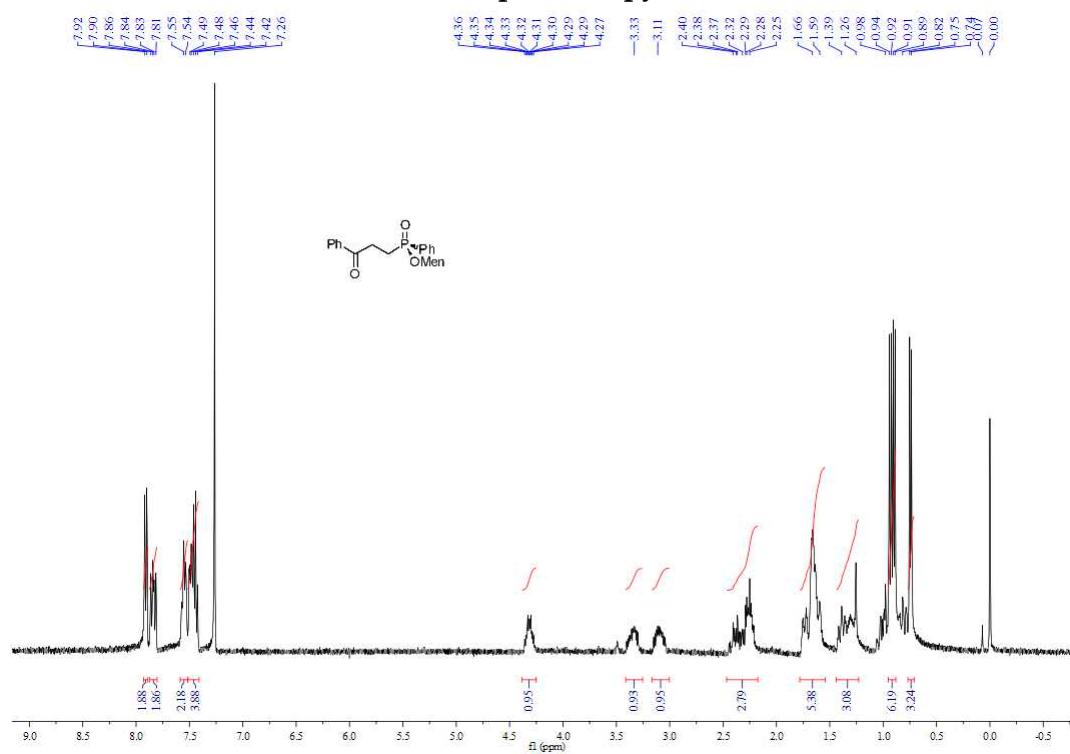

**$^{13}\text{C}$  NMR spectroscopy of 5a**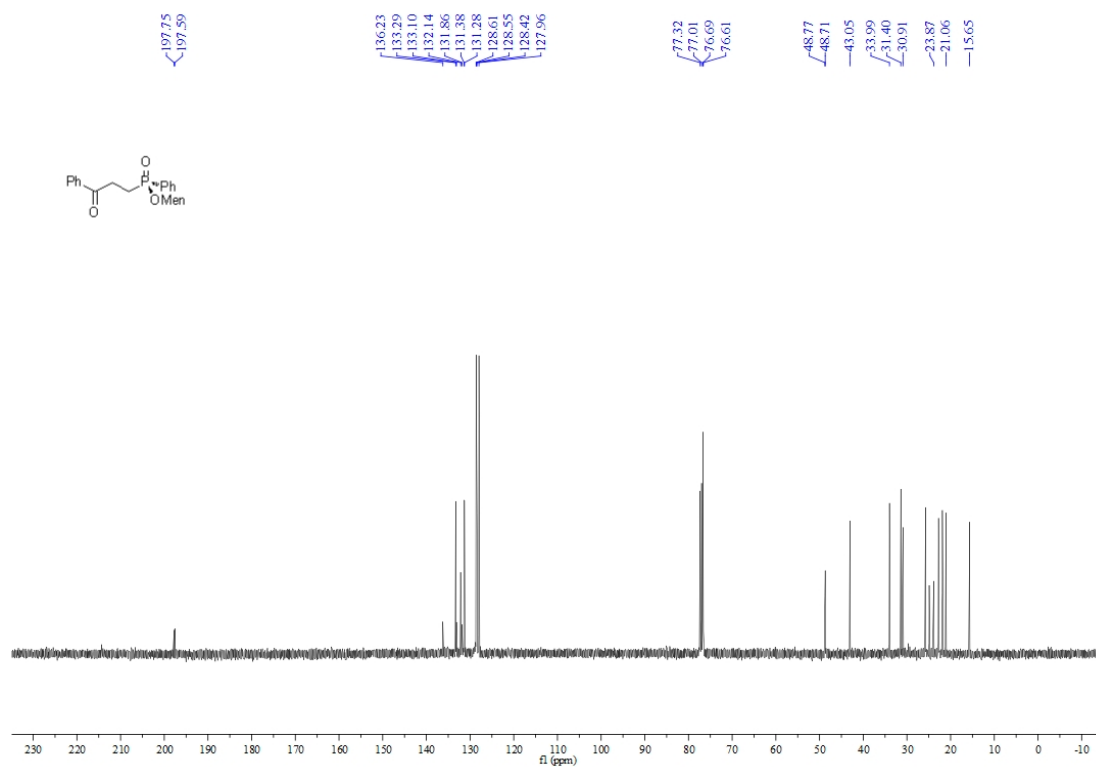**Ethyl 3-oxo-3-phenylpropyl phenylphosphinate, 5b,  $^{31}\text{P}$  NMR spectroscopy**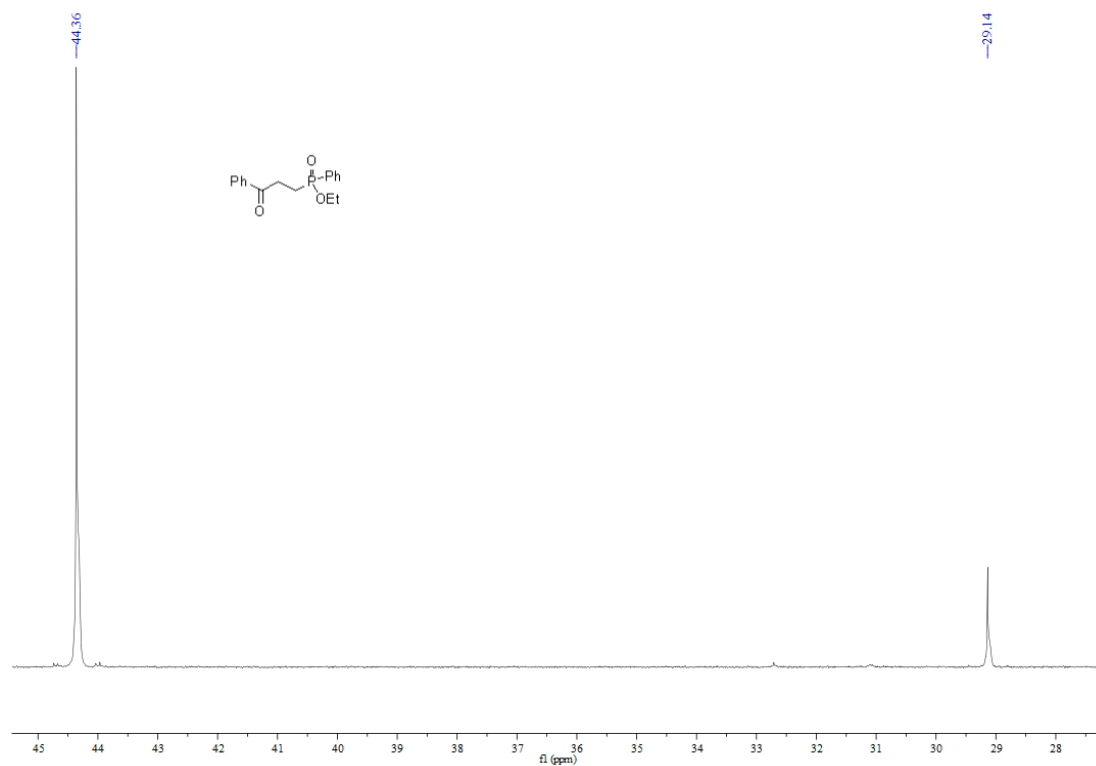

**<sup>1</sup>H NMR spectroscopy of 5b**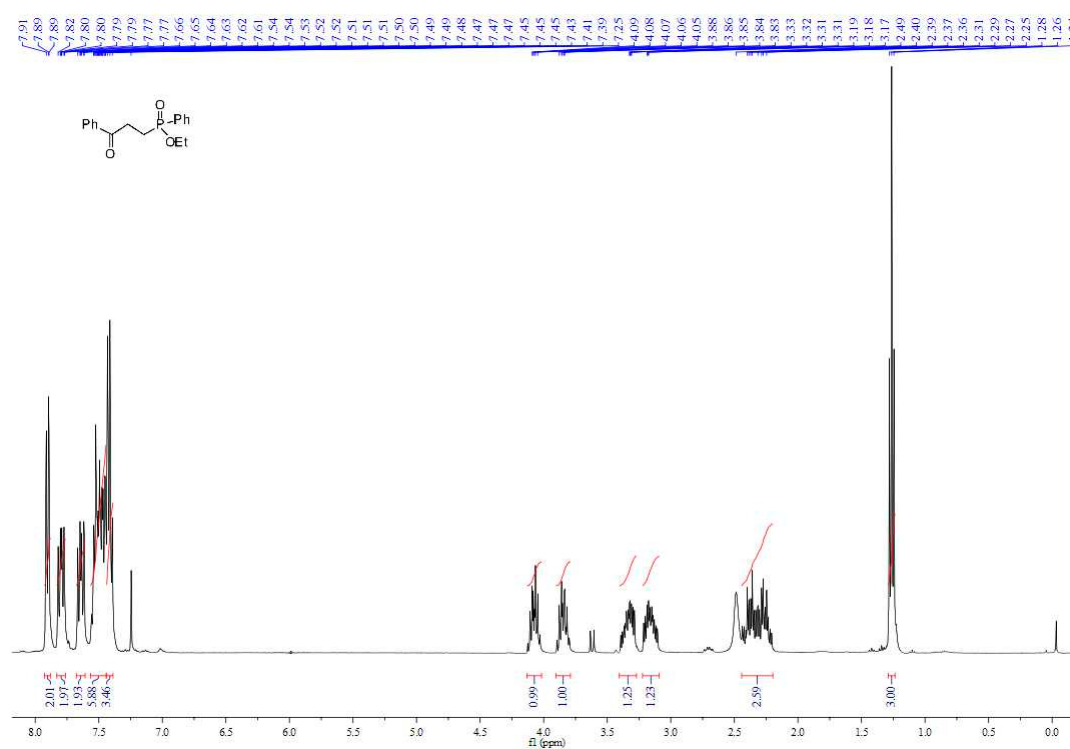**Diethyl 3-oxo-3-phenyl propylphosphonate, 5c, <sup>31</sup>P NMR spectroscopy**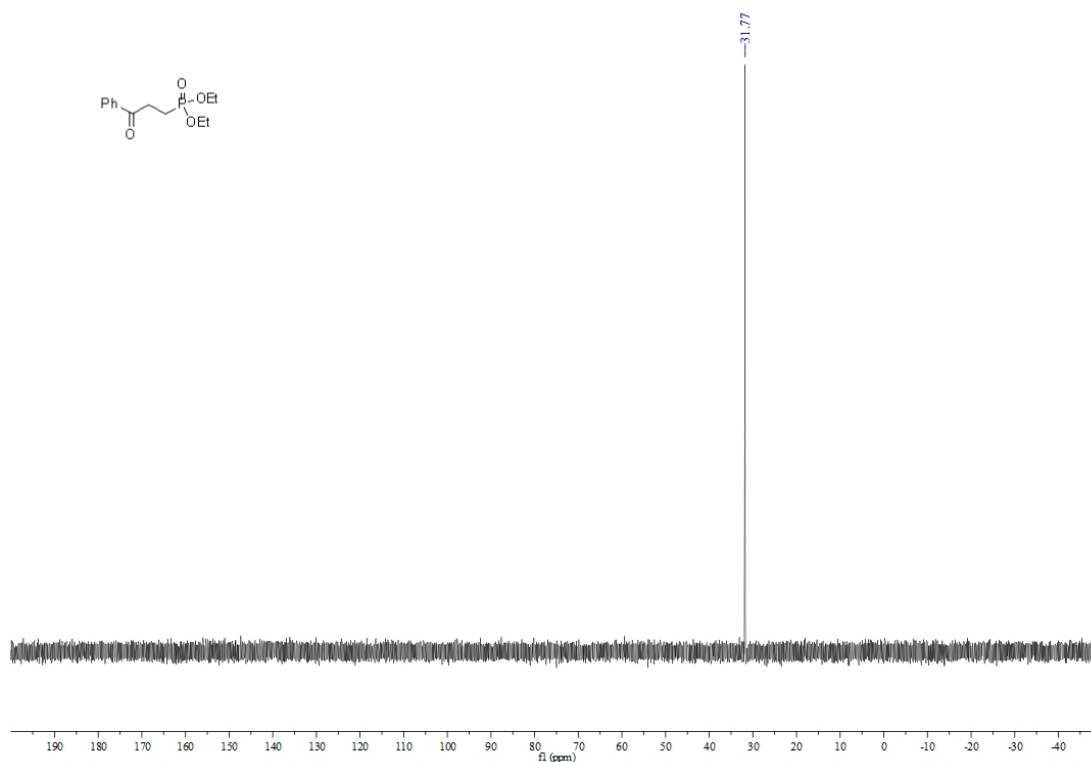

<sup>1</sup>H NMR spectroscopy of 5c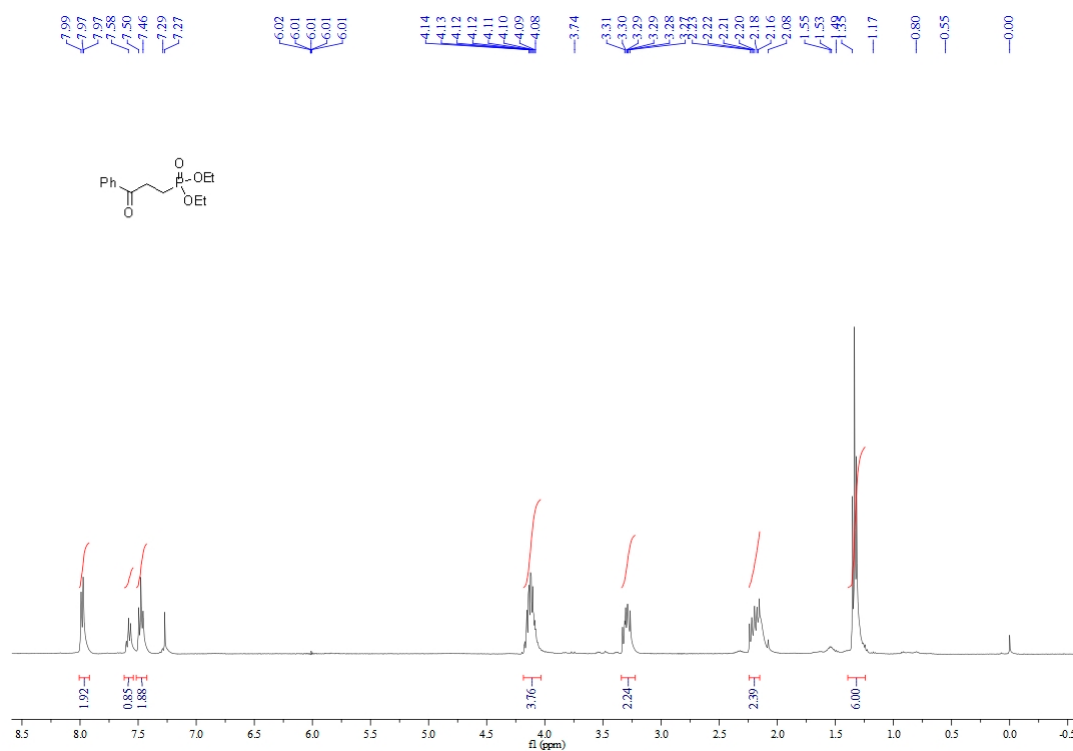<sup>13</sup>C NMR spectroscopy of 5c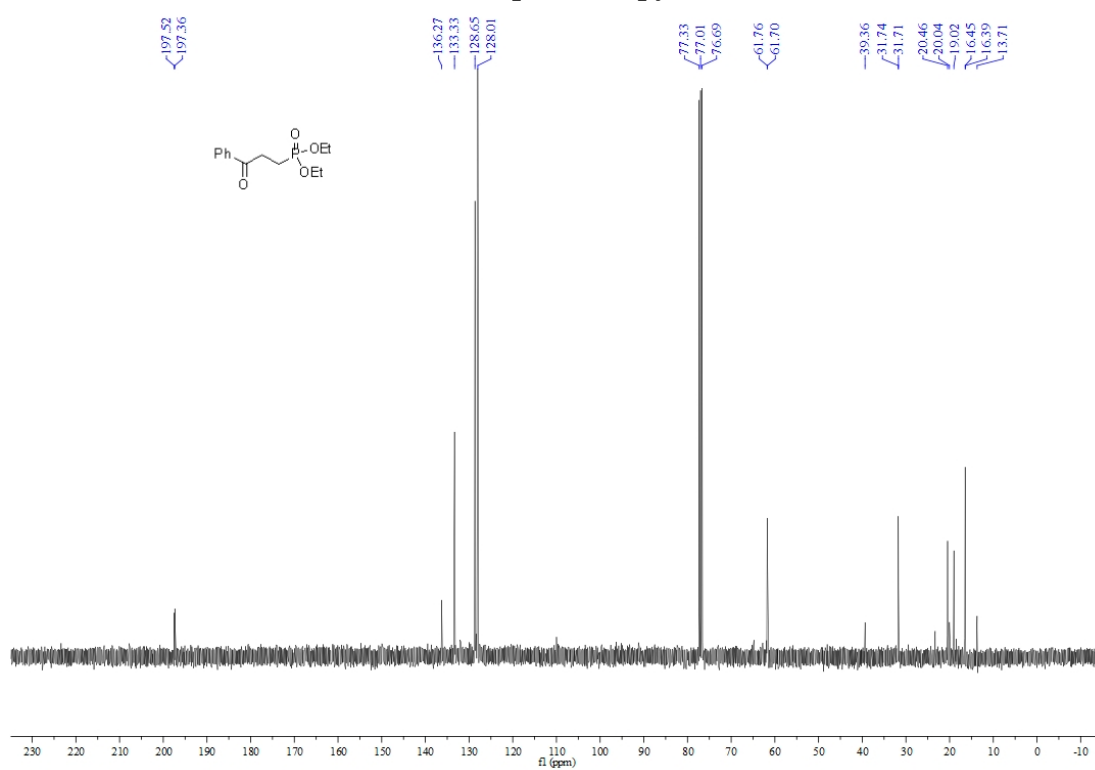

Dimethyl 3-oxo-3-phenylpropyl phenylphosphonate, 5d,  $^{31}\text{P}$  NMR spectroscopy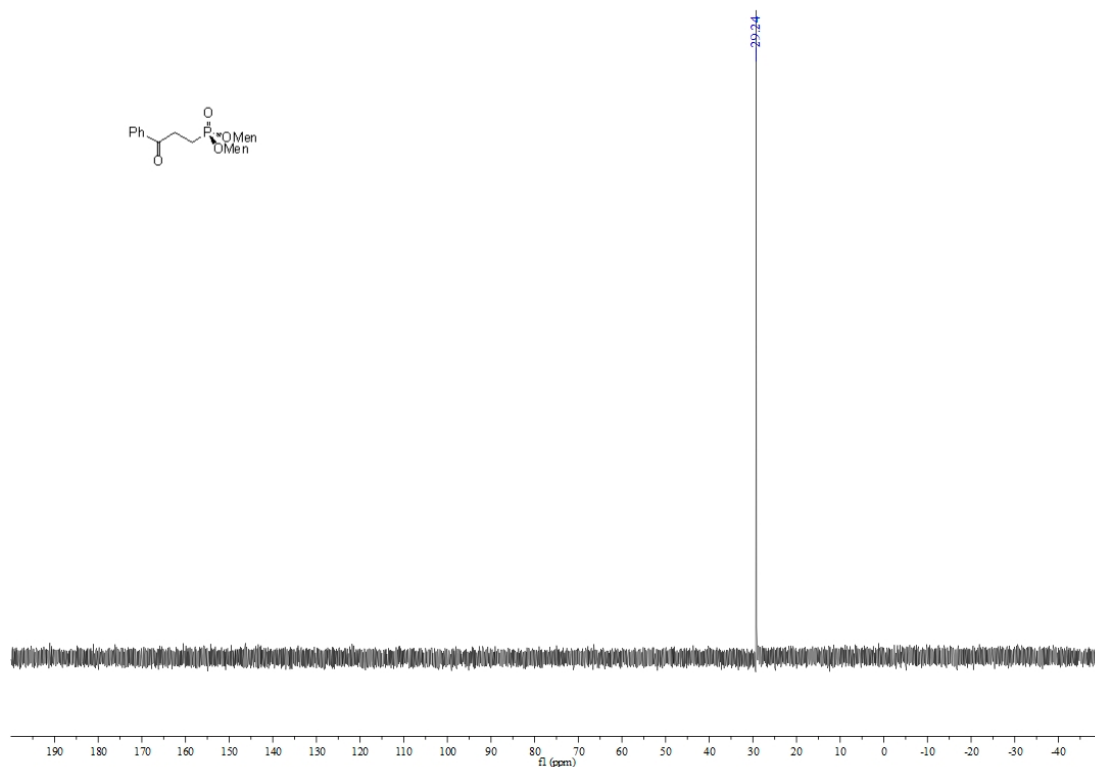 $^1\text{H}$  NMR spectroscopy of 5d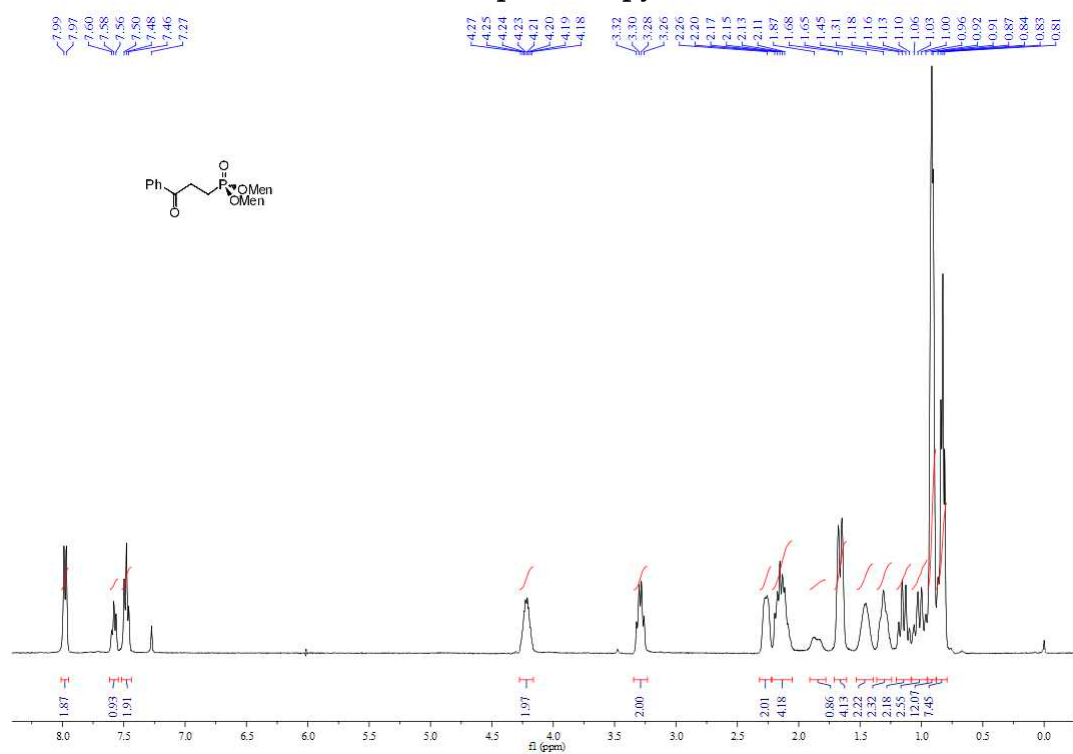

**$^{13}\text{C}$  NMR spectroscopy of 5d**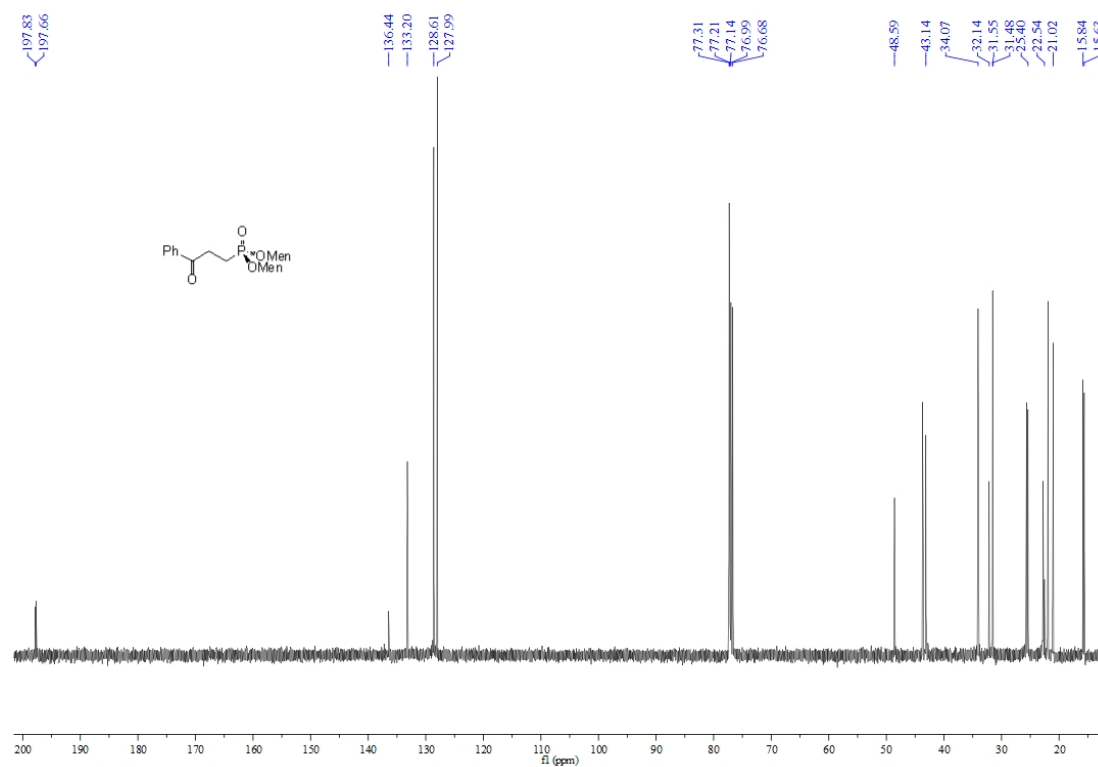**Diethyl 3-oxo-3-p-tolyl propylphosphonate, 5e,  $^{31}\text{P}$  NMR spectroscopy**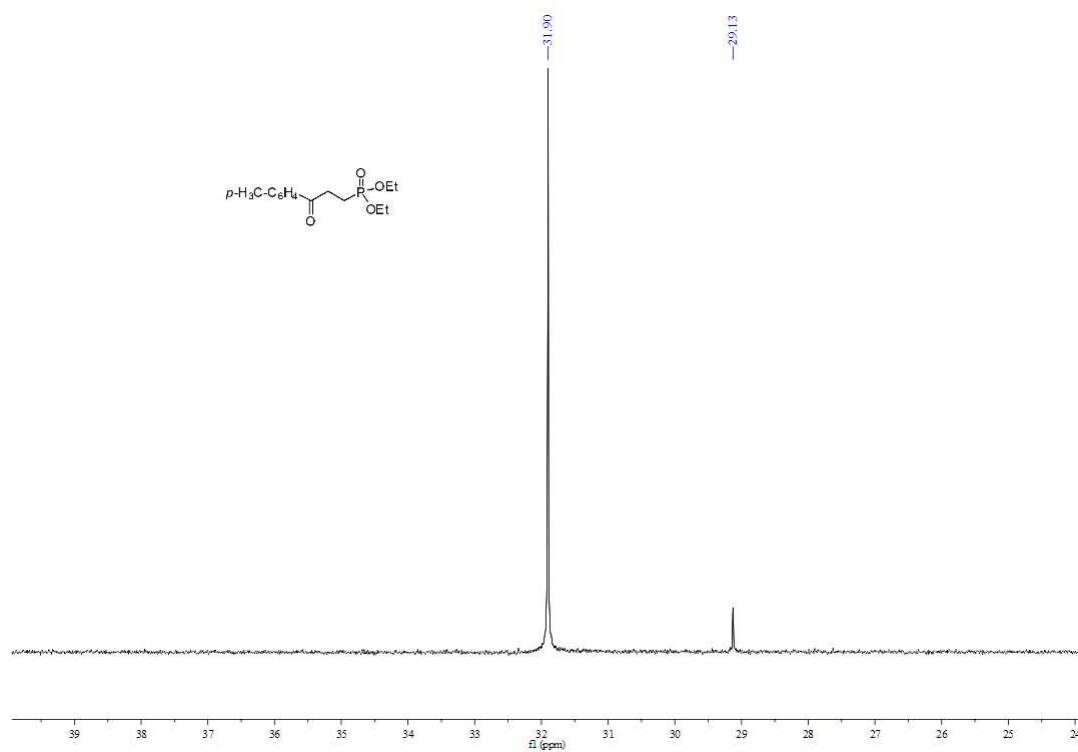

**<sup>1</sup>H NMR spectroscopy of 5e**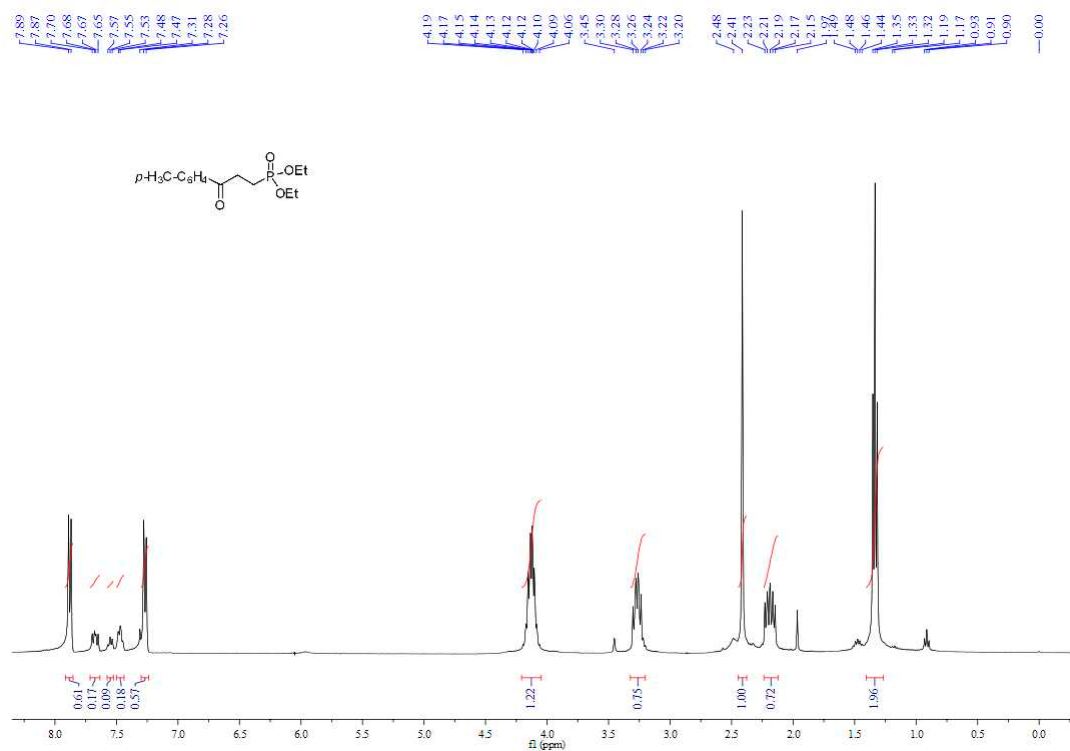**Diphenyl 3-oxo-3-phenyl propylphosphonate, 5f, <sup>31</sup>P NMR spectroscopy**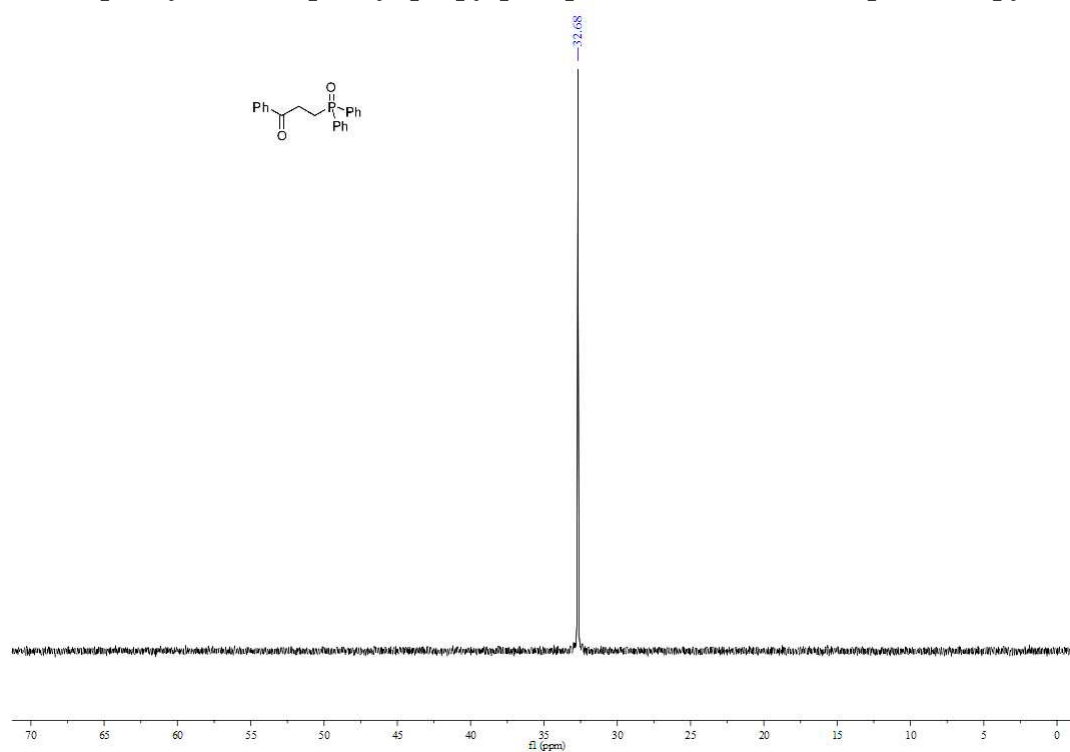

**<sup>1</sup>H NMR spectroscopy of 5f**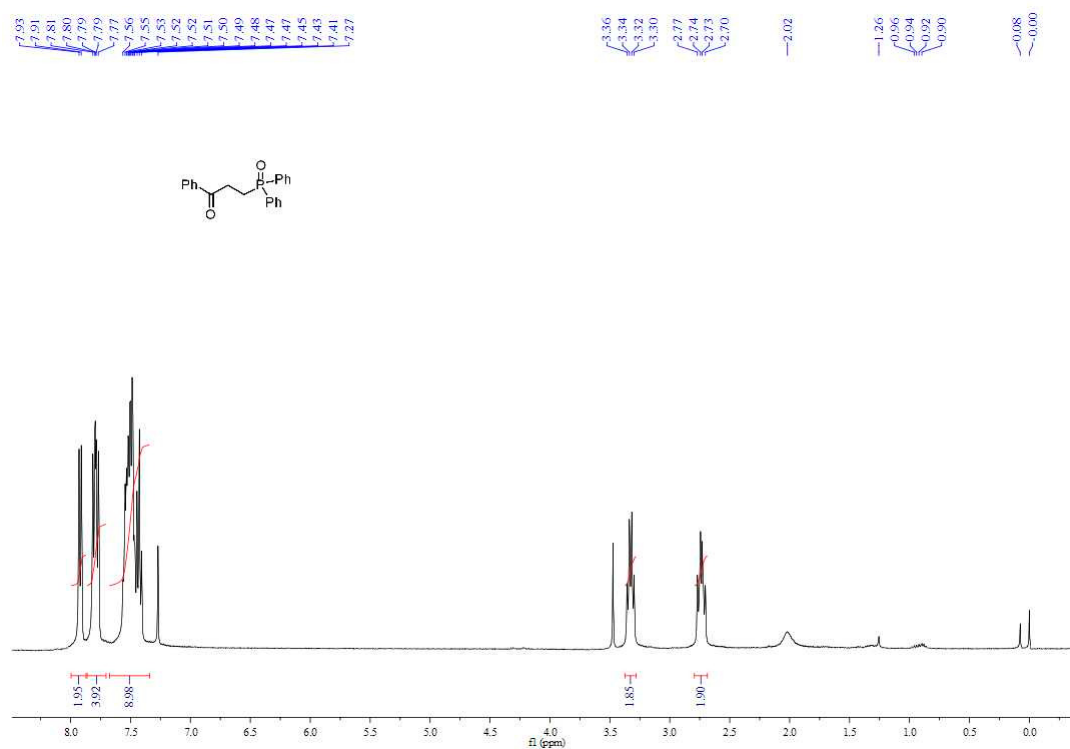**<sup>13</sup>C NMR spectroscopy of 5f**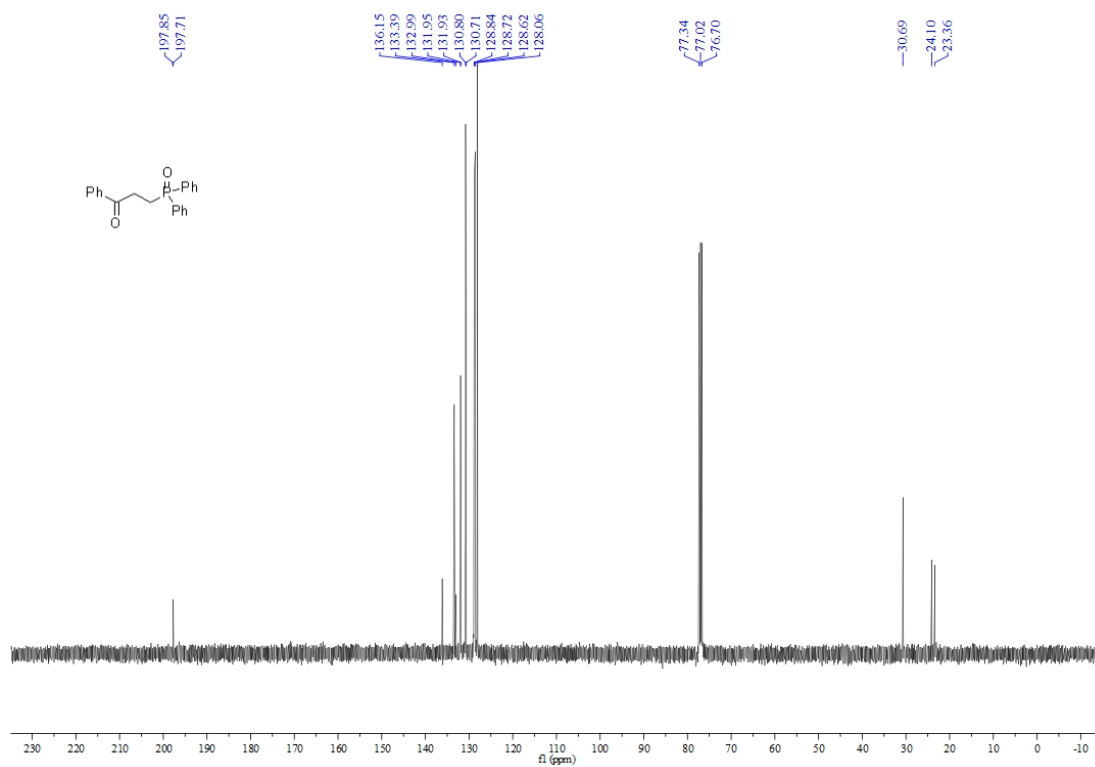

**(S<sub>P</sub>)-Menthyl 3-oxo-3-phenylpropyl phenylphosphinate, 5g/5g', <sup>31</sup>P NMR spectroscopy**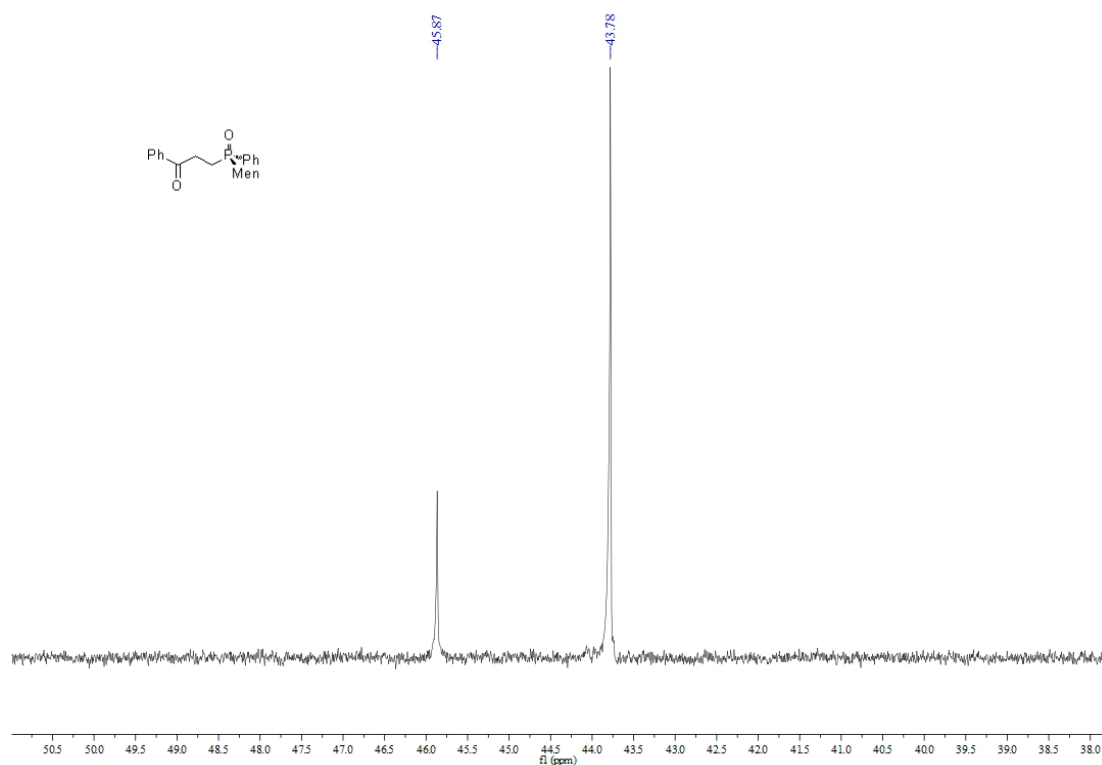**<sup>1</sup>H NMR spectroscopy of 5g/5g'**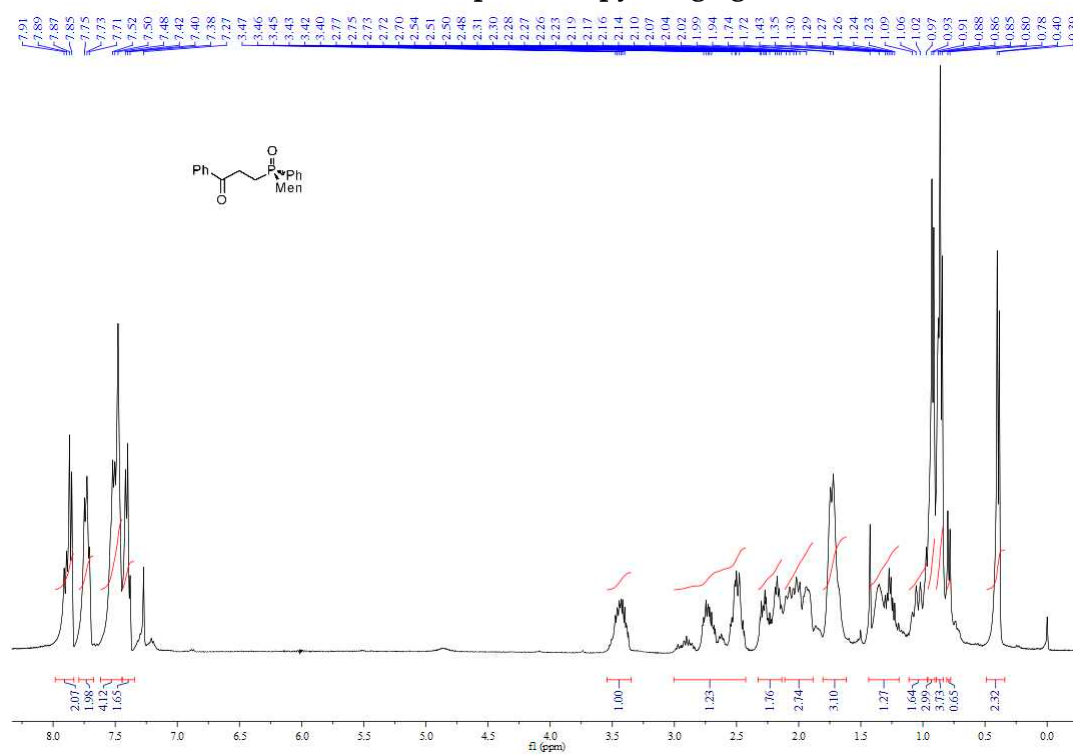

**$^{13}\text{C}$  NMR spectroscopy of 5g/5g'**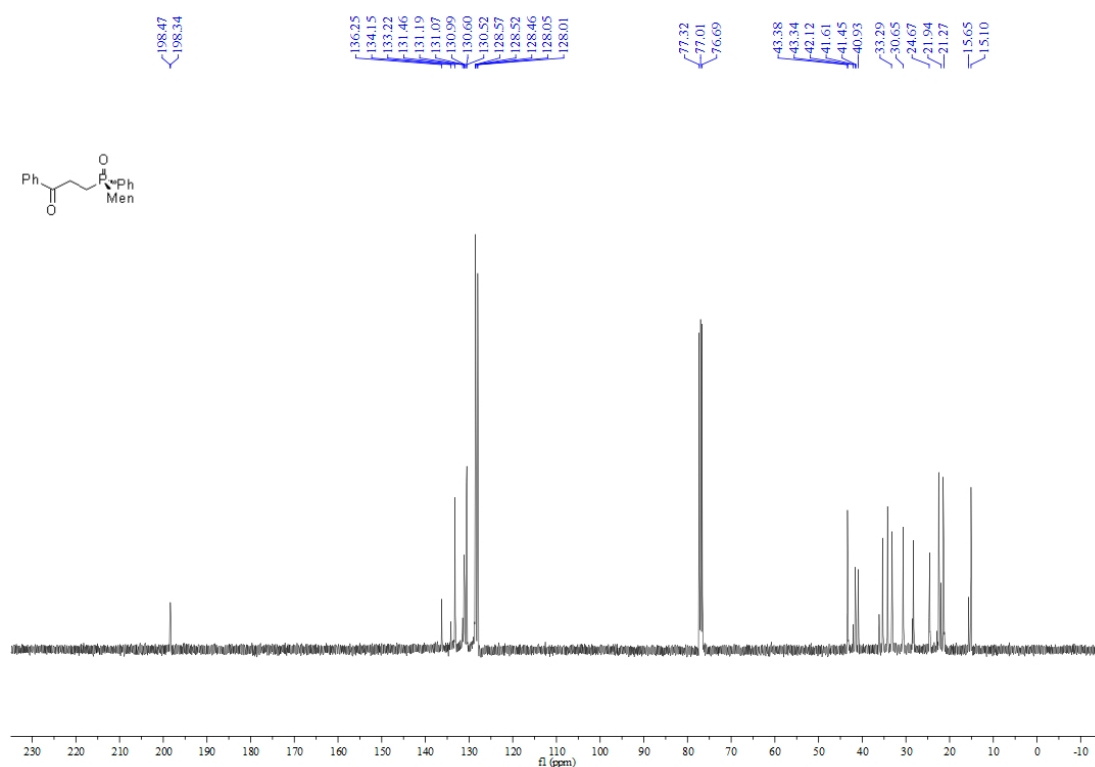**(S<sub>P</sub>)-Menthyl-3-butylamino-3-phenylpropyl phenylphosphinate, 11aa,  $^{31}\text{P}$  NMR spectroscopy**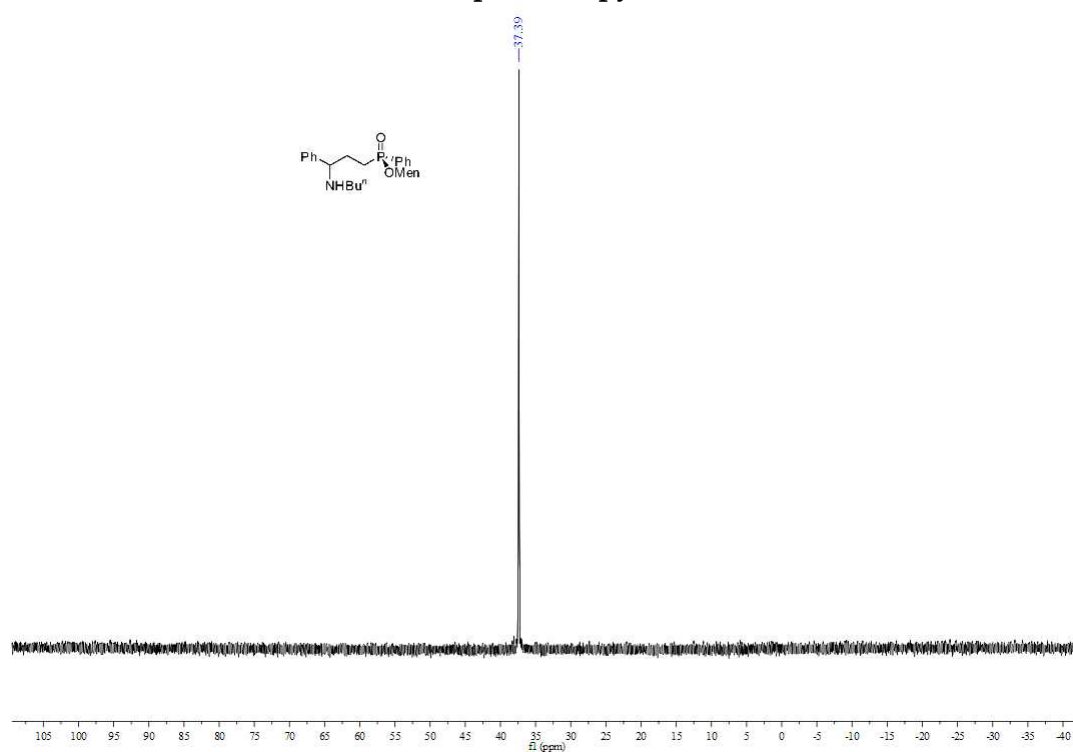

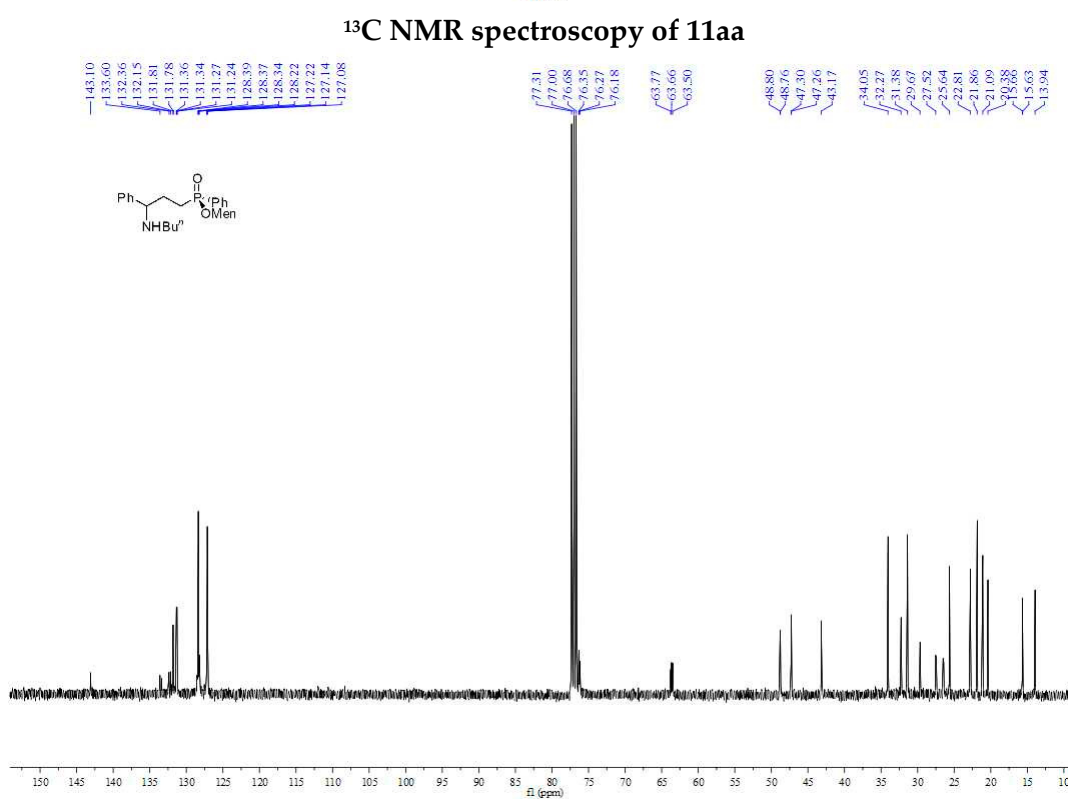

**(S<sub>P</sub>)-Menthyl-3-phenethylamino-3-phenylpropyl phenylphosphinate, 11ab, <sup>31</sup>P NMR spectroscopy**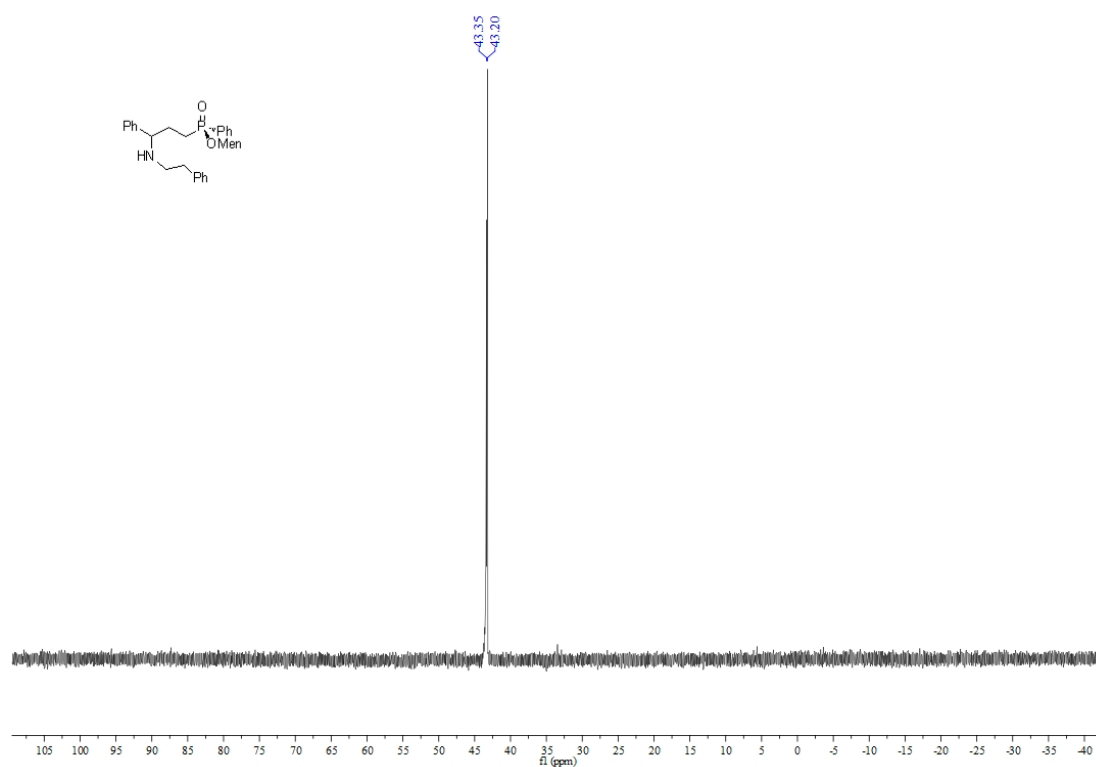**<sup>1</sup>H NMR spectroscopy of 11ab**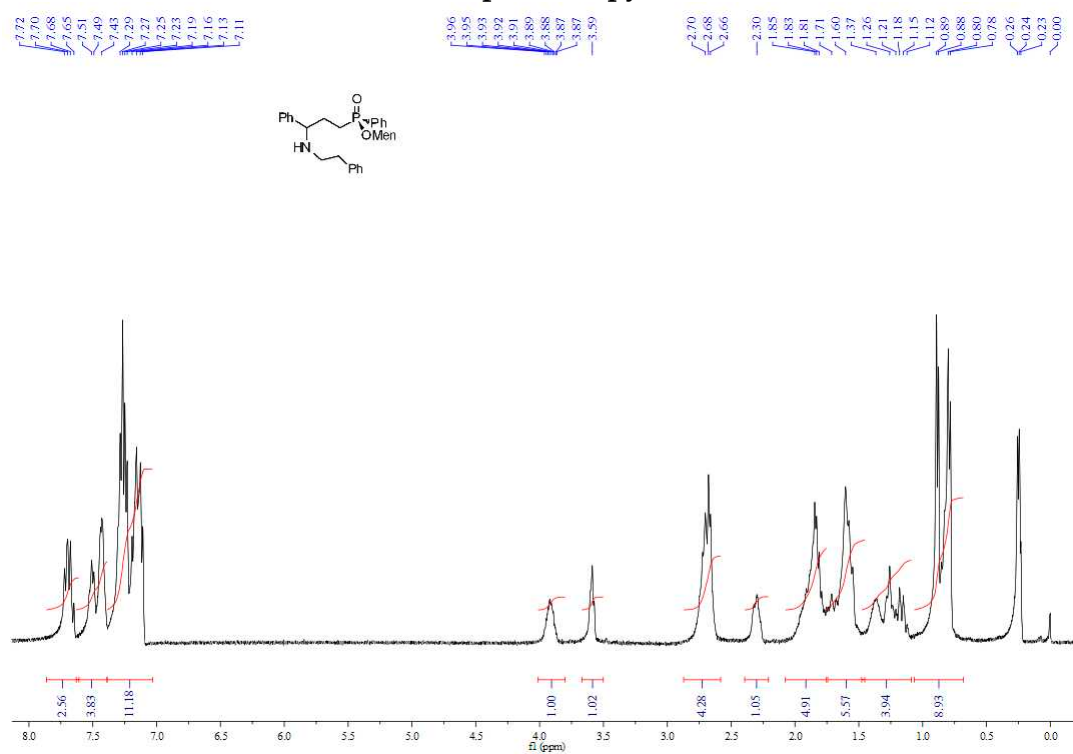

**<sup>13</sup>C NMR spectroscopy of 11ab**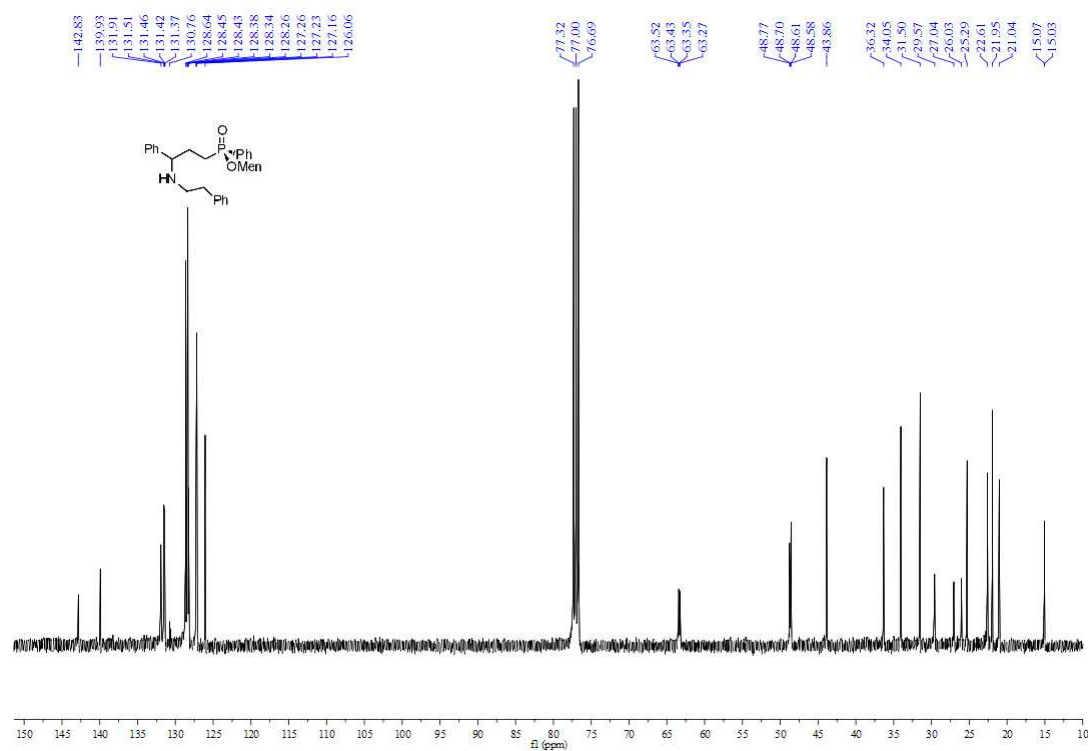**(S<sub>P</sub>)-Menthyl-3-phenyl-3-pyrrolidin-1-yl propylphosphinate, 11ac, <sup>31</sup>P NMR spectroscopy**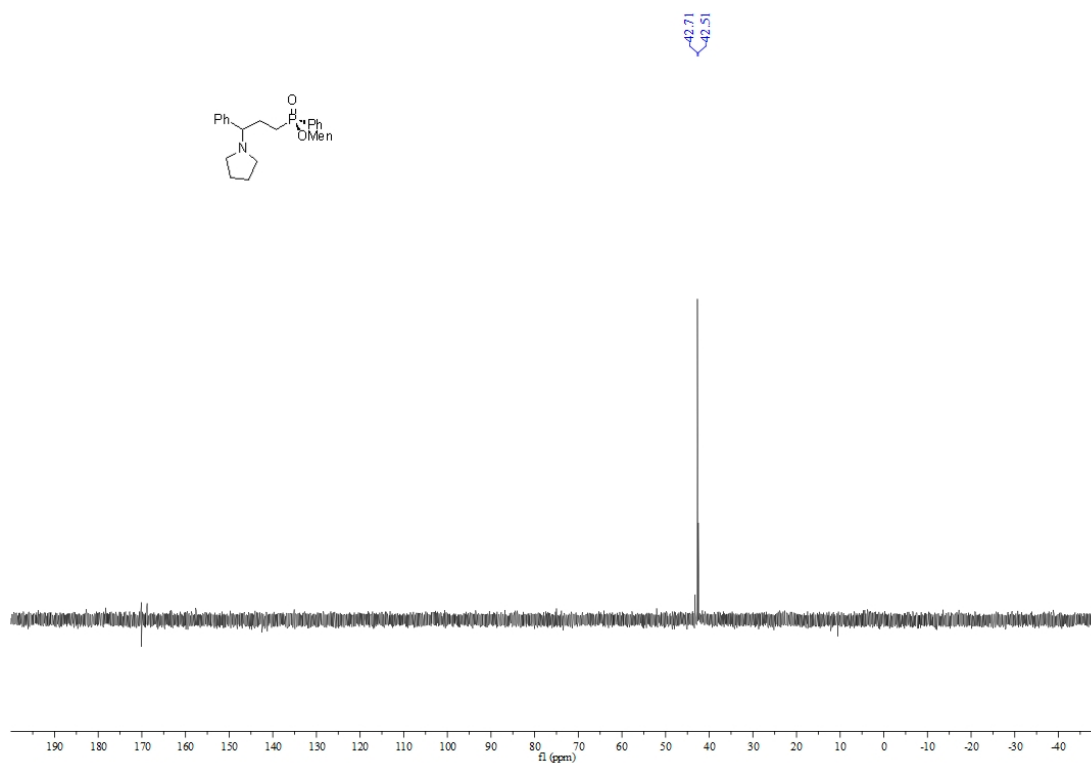

<sup>1</sup>H NMR spectroscopy of 11ac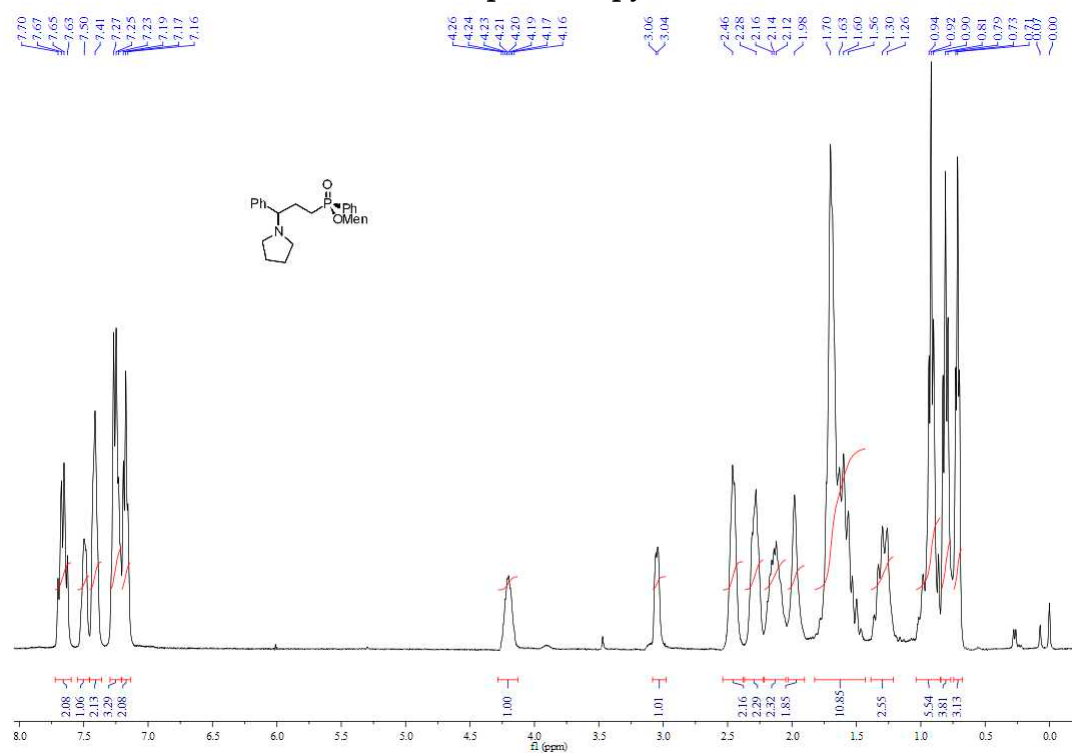<sup>13</sup>C NMR spectroscopy of 11ac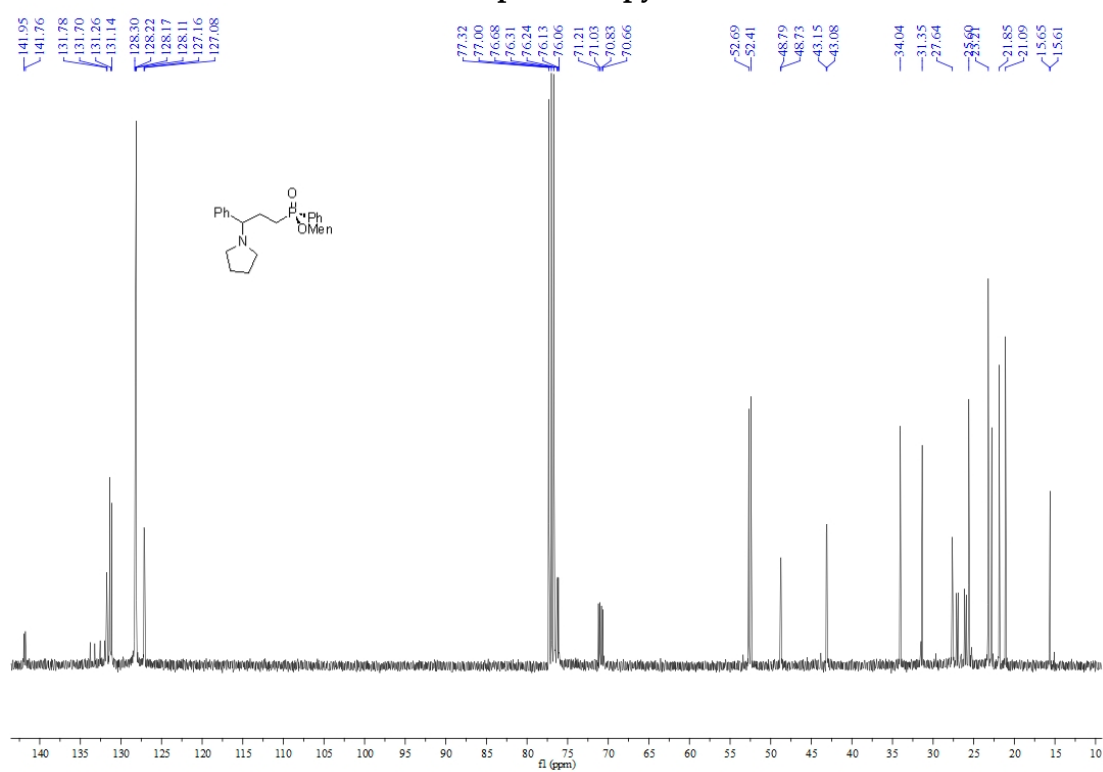

Ethyl 3-butylamino-3-phenylpropyl phenylphosphinate, 11ba,  $^{31}\text{P}$  NMR spectroscopy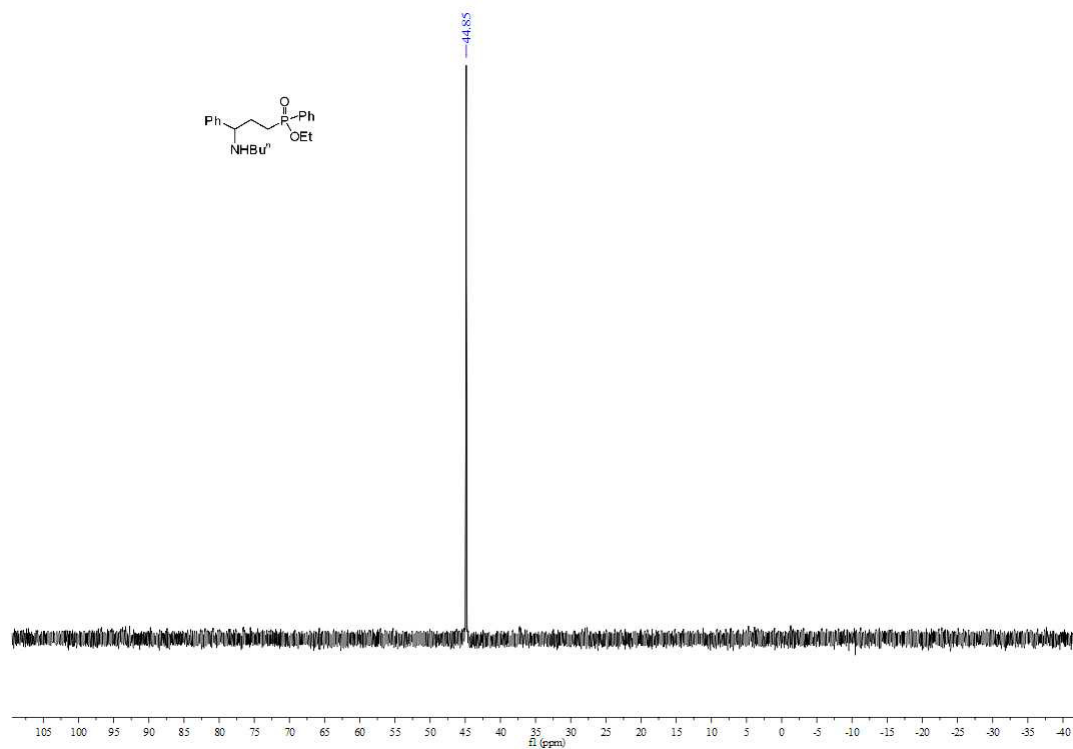 $^1\text{H}$  NMR spectroscopy of 11ba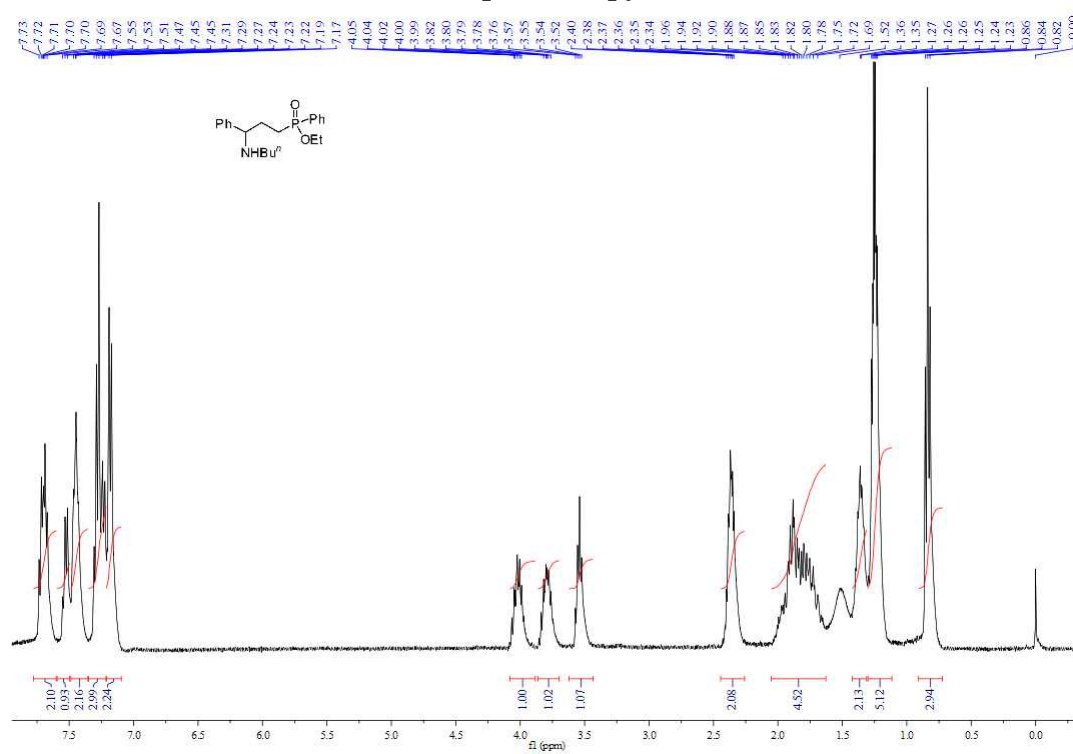

**<sup>13</sup>C NMR spectroscopy of 11ba**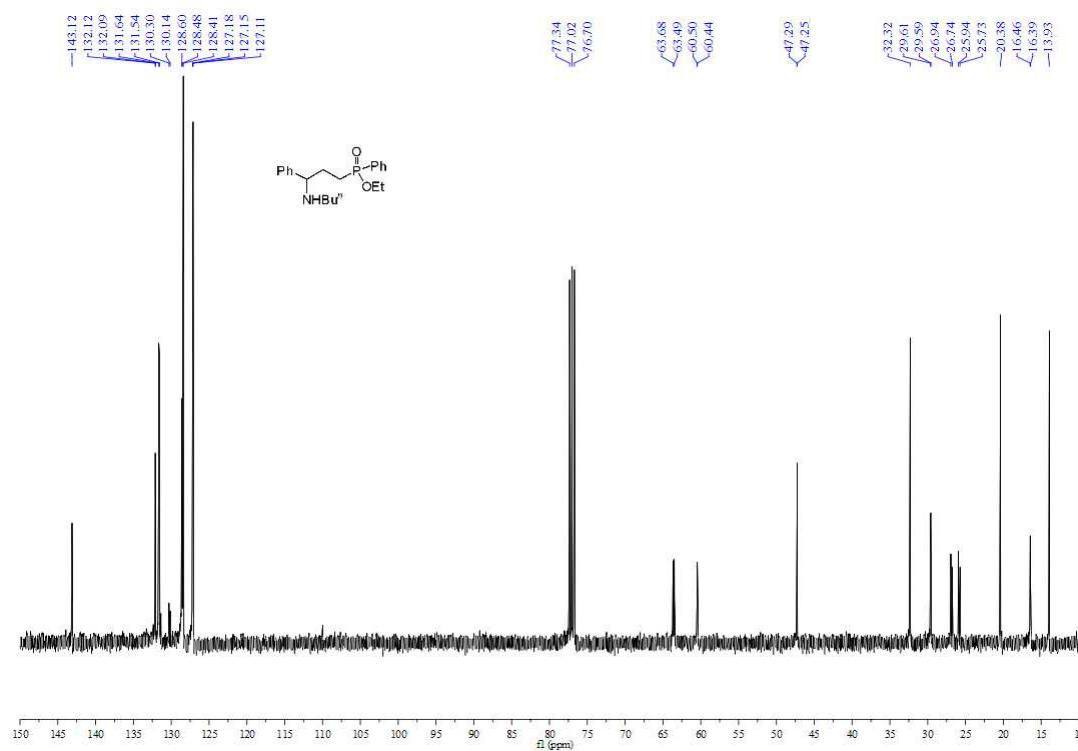**Ethyl 3-phenethylamino-3-phenylpropyl phenylphosphinate, 11bb, <sup>31</sup>P NMR spectroscopy**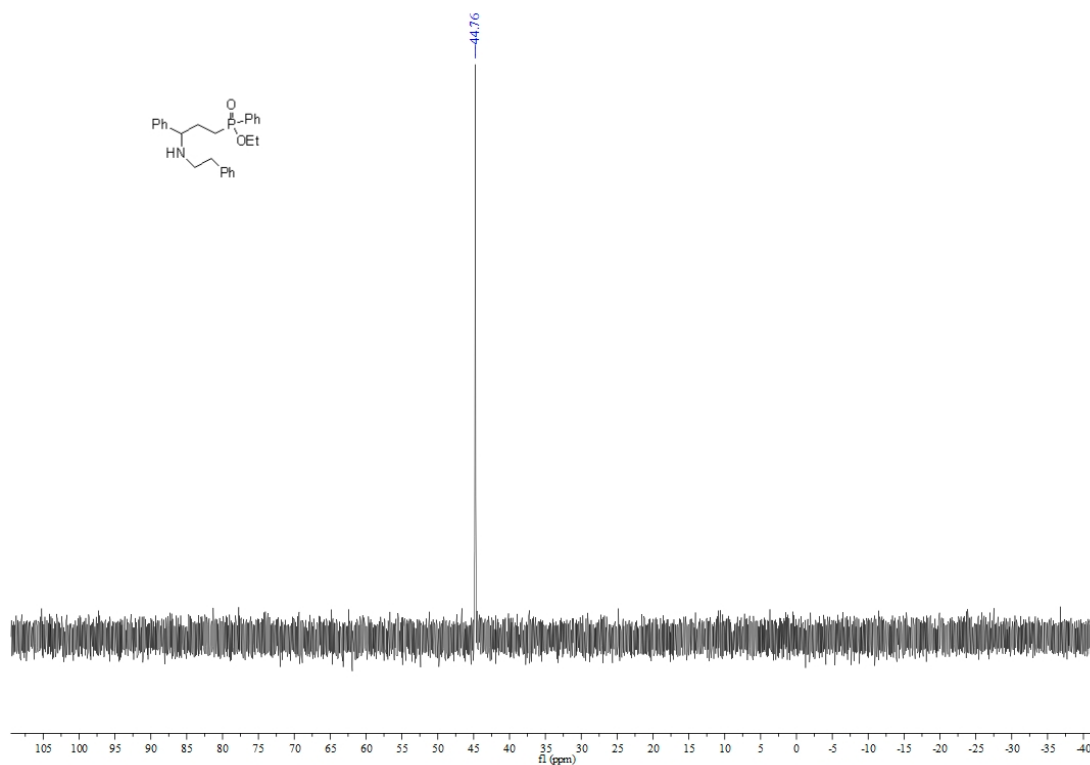

**<sup>1</sup>H NMR spectroscopy of 11bb**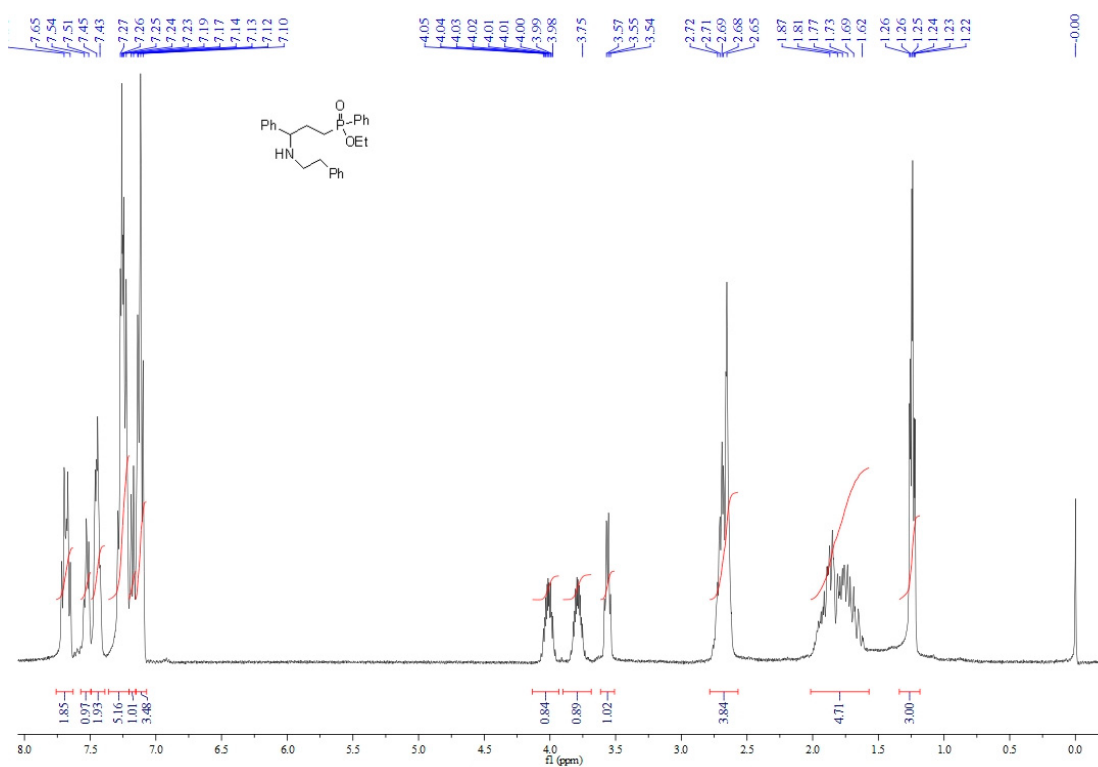**<sup>13</sup>C NMR spectroscopy of 11bb**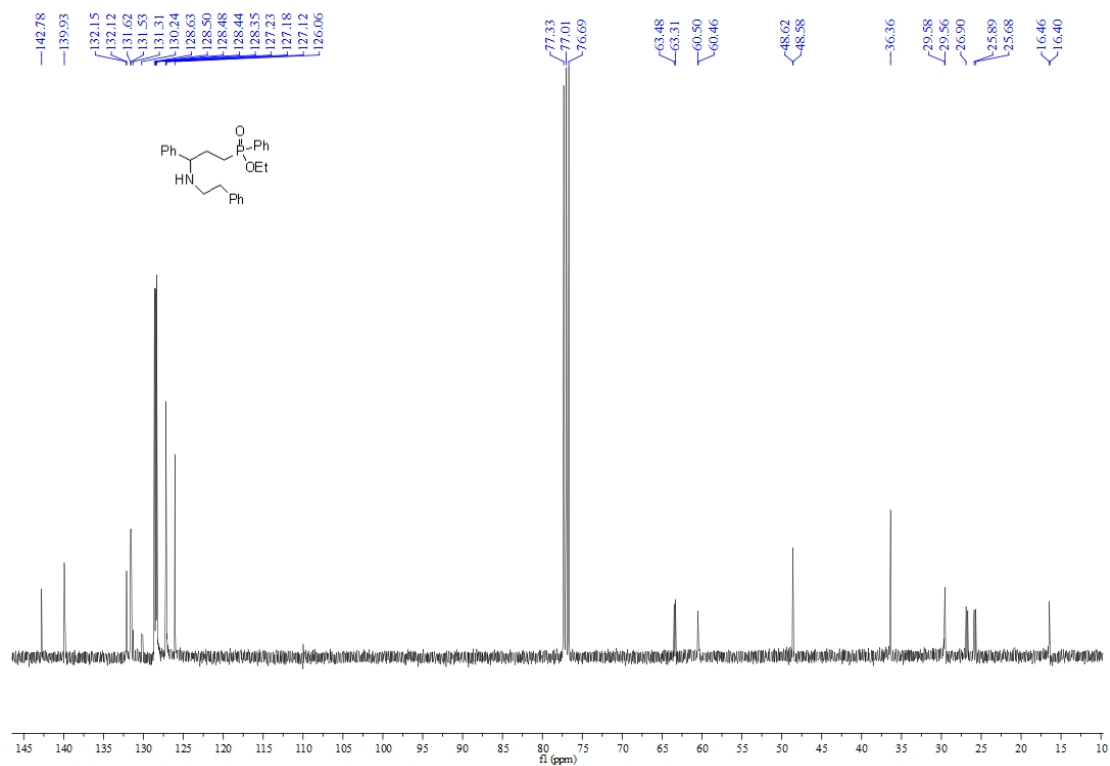

Diethyl 3-butylamino-3-phenyl propylphosphonate, 11ca,  $^{31}\text{P}$  NMR spectroscopy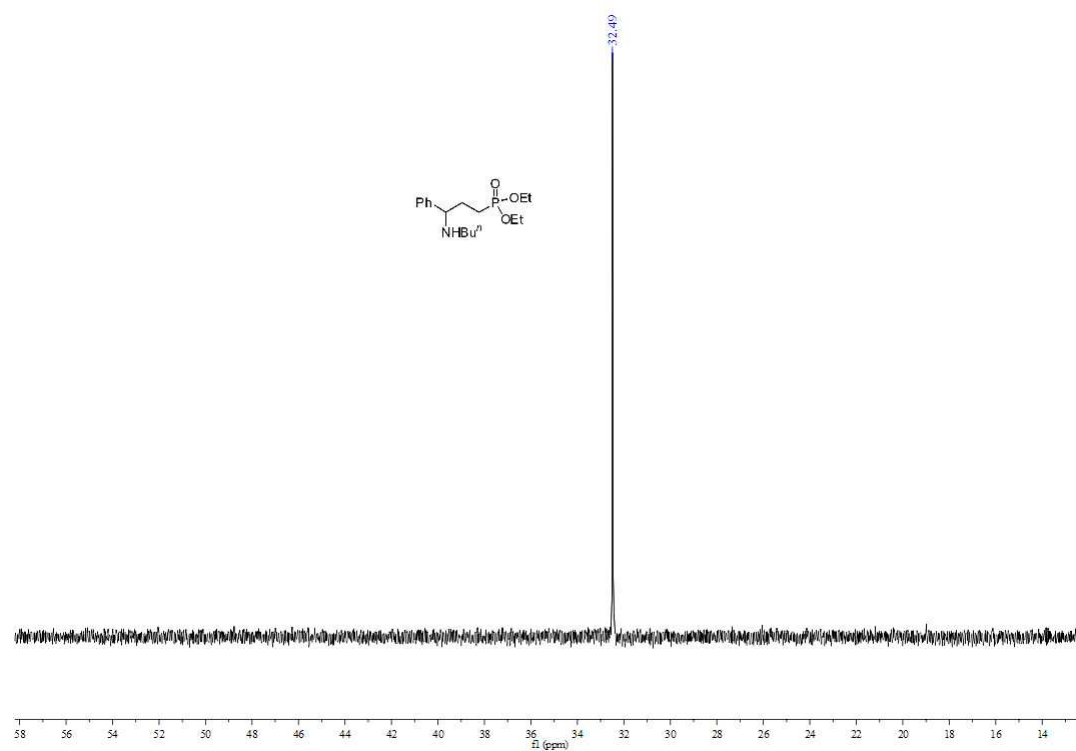 $^1\text{H}$  NMR spectroscopy of 11ca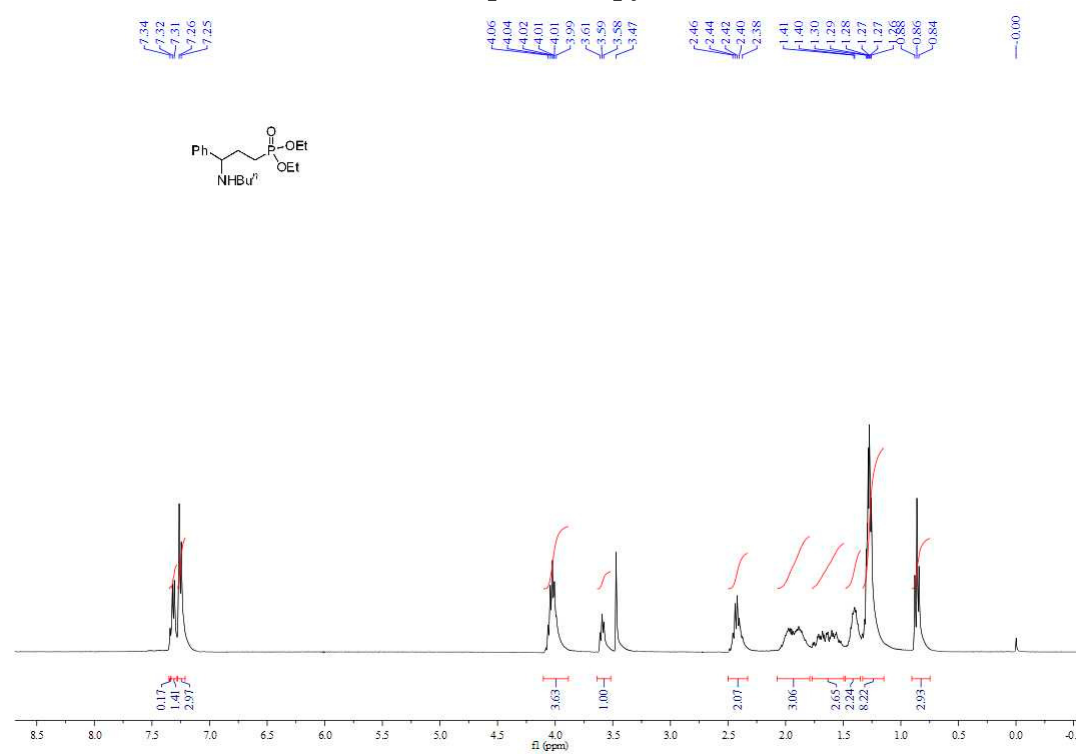

**<sup>13</sup>C NMR spectroscopy of 11ca**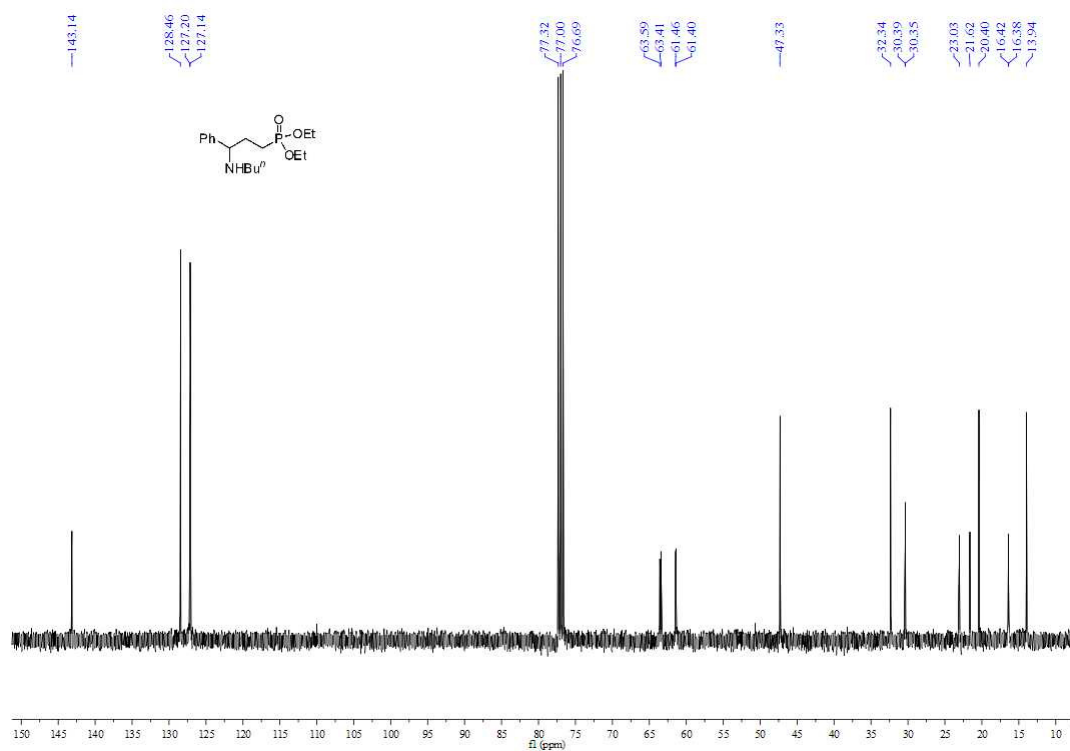**Diethyl 3-phenethylamino-3-phenyl propylphosphonate, 11cb, <sup>31</sup>P NMR spectroscopy**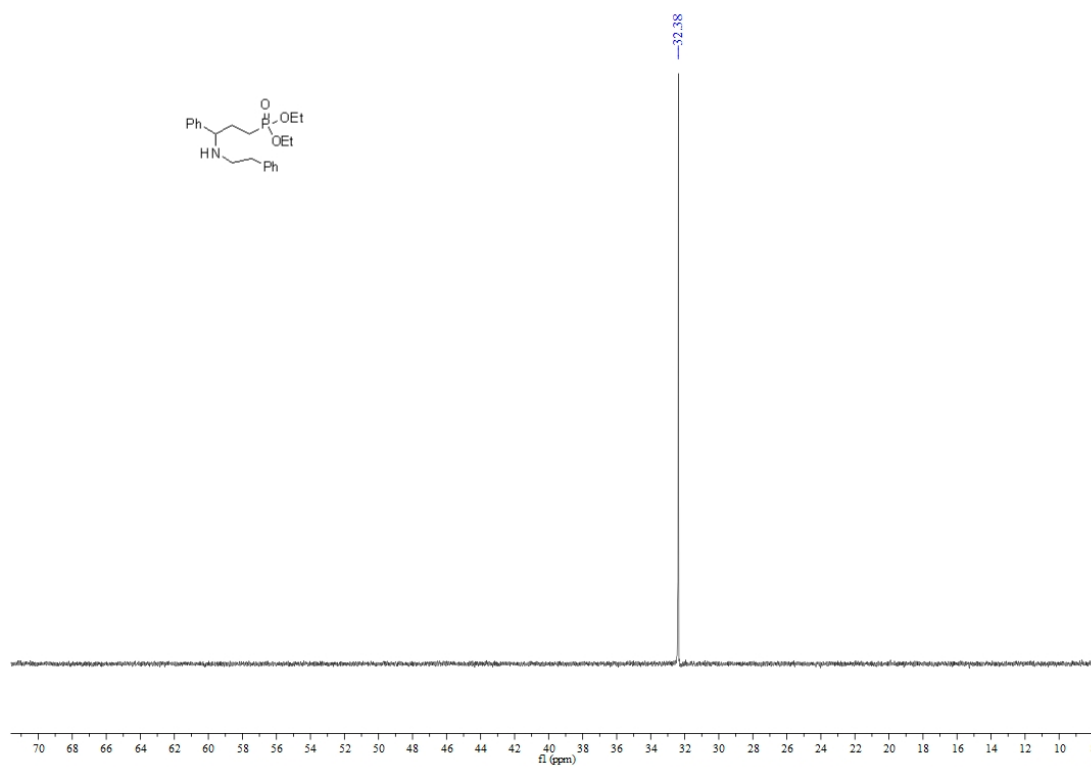

**<sup>1</sup>H NMR spectroscopy of 11cb**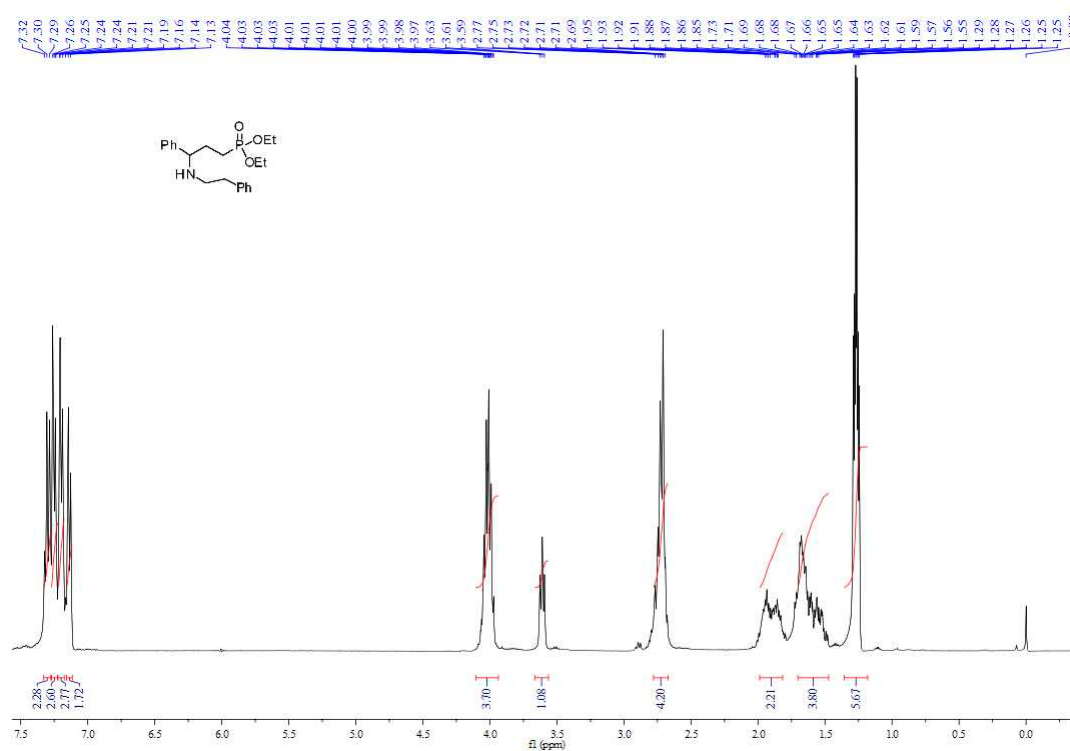**<sup>13</sup>C NMR spectroscopy of 11cb**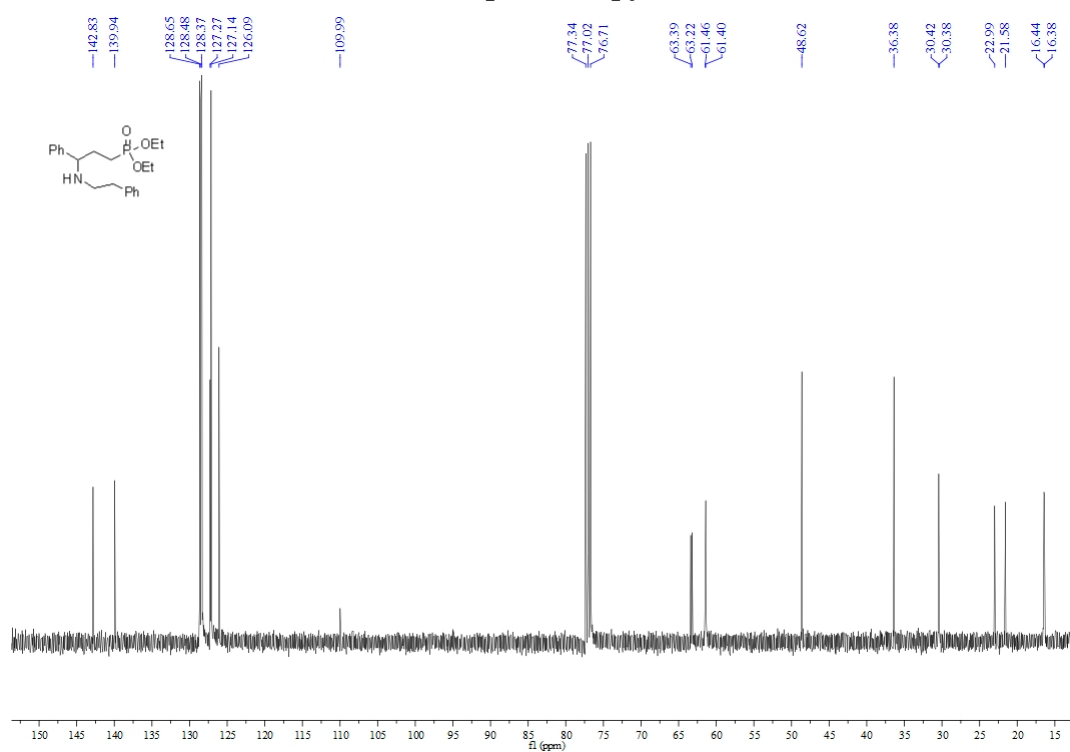

**Dimethyl 3-butylamino-3-phenyl propylphosphonate, 11da,  $^{31}\text{P}$  NMR spectroscopy**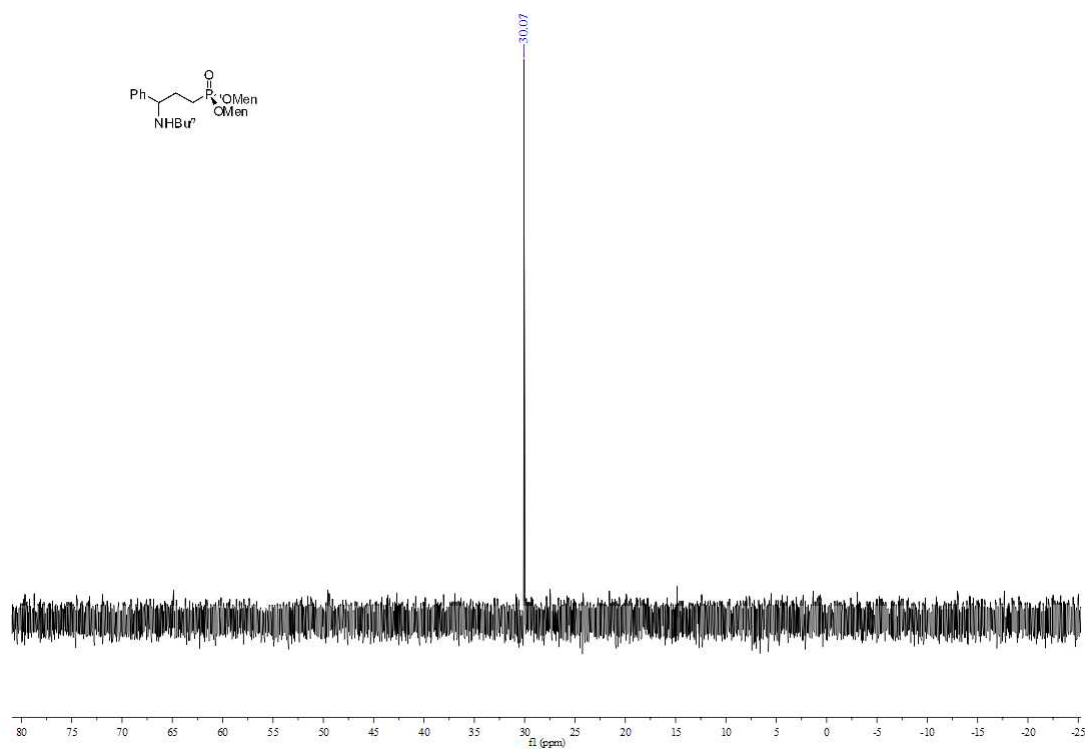 **$^1\text{H}$  NMR spectroscopy of 11da**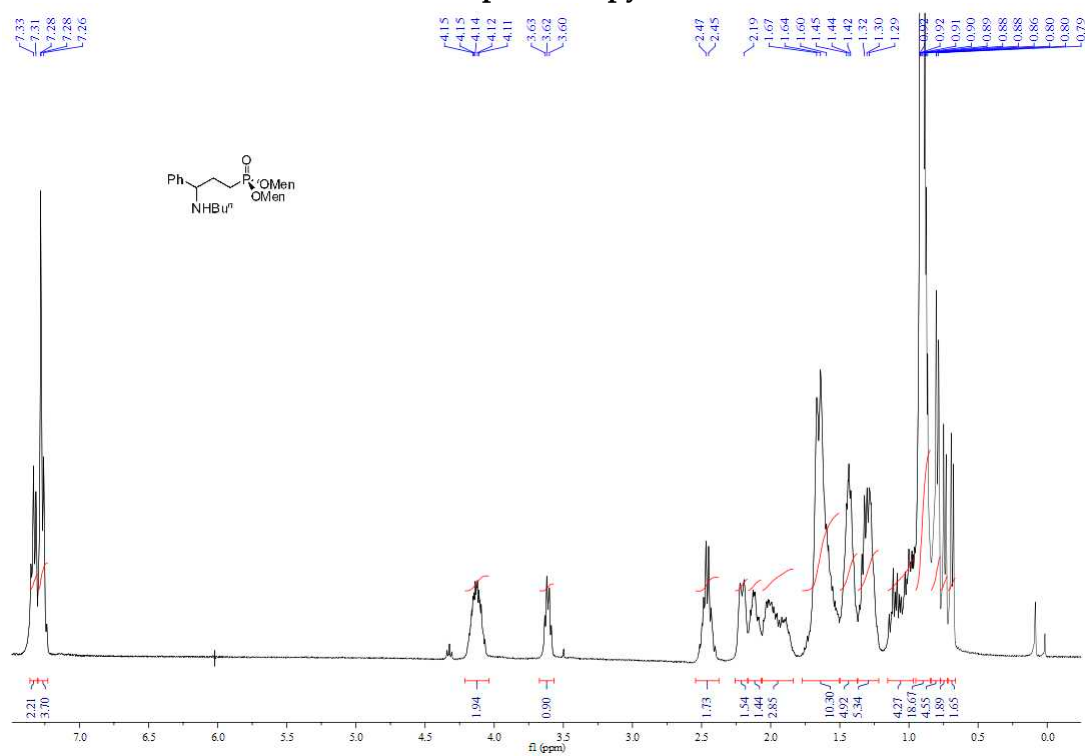

**$^{13}\text{C}$  NMR spectroscopy of 11da**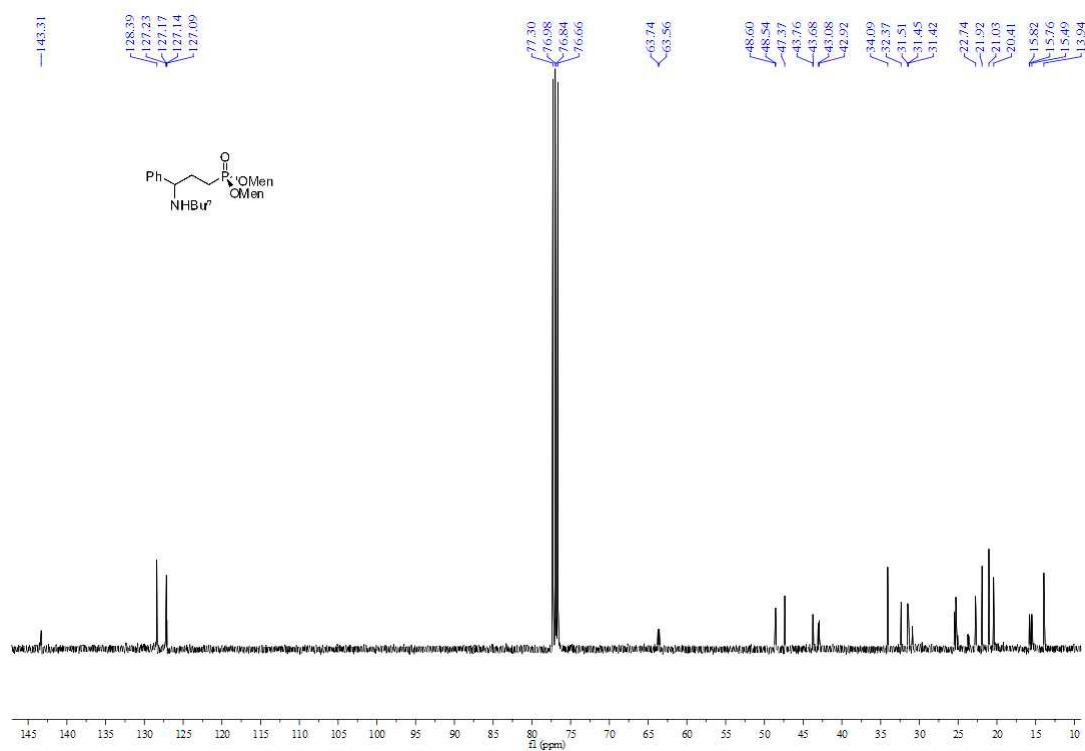**Dimethyl 3-phenylethylamino-3-phenyl propylphosphonate, 11db,  $^{31}\text{P}$  NMR spectroscopy**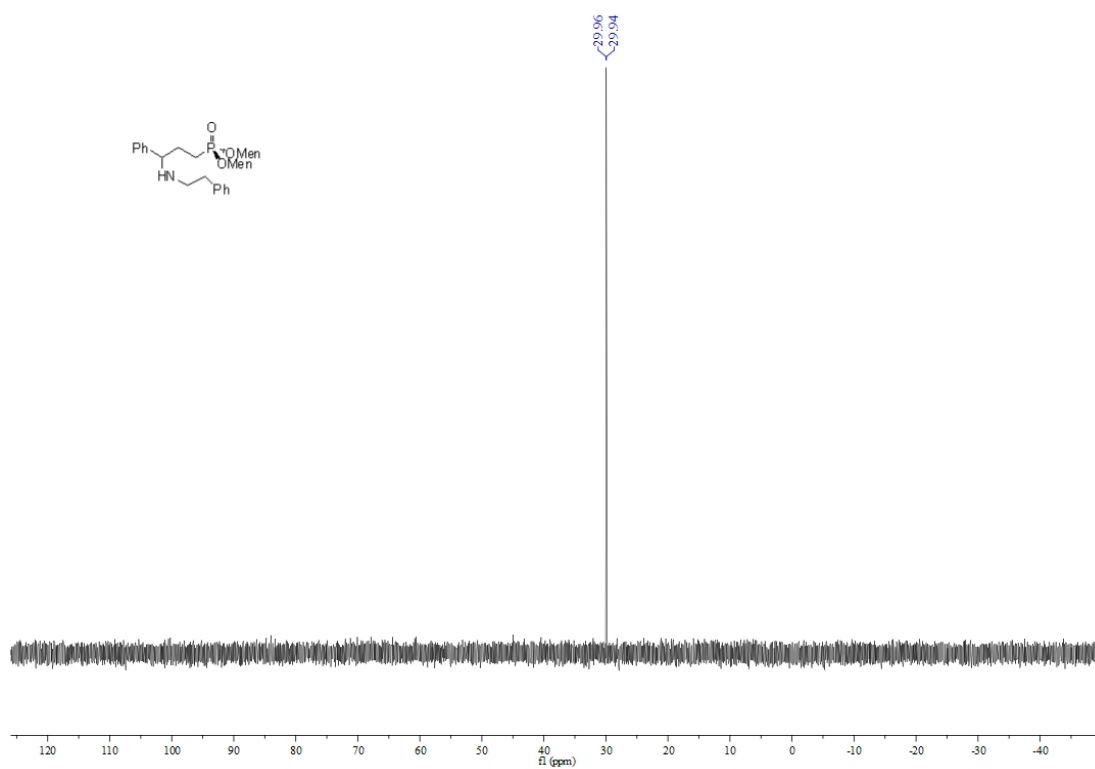

**<sup>1</sup>H NMR spectroscopy of 11db**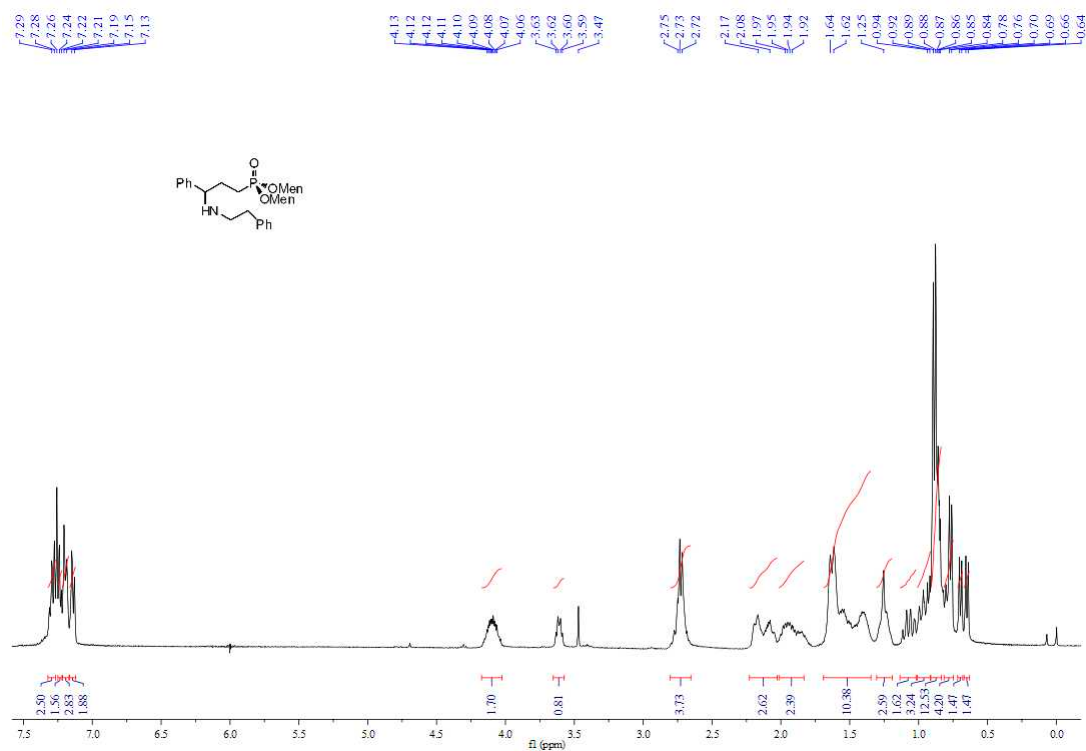**<sup>13</sup>C NMR spectroscopy of 11db**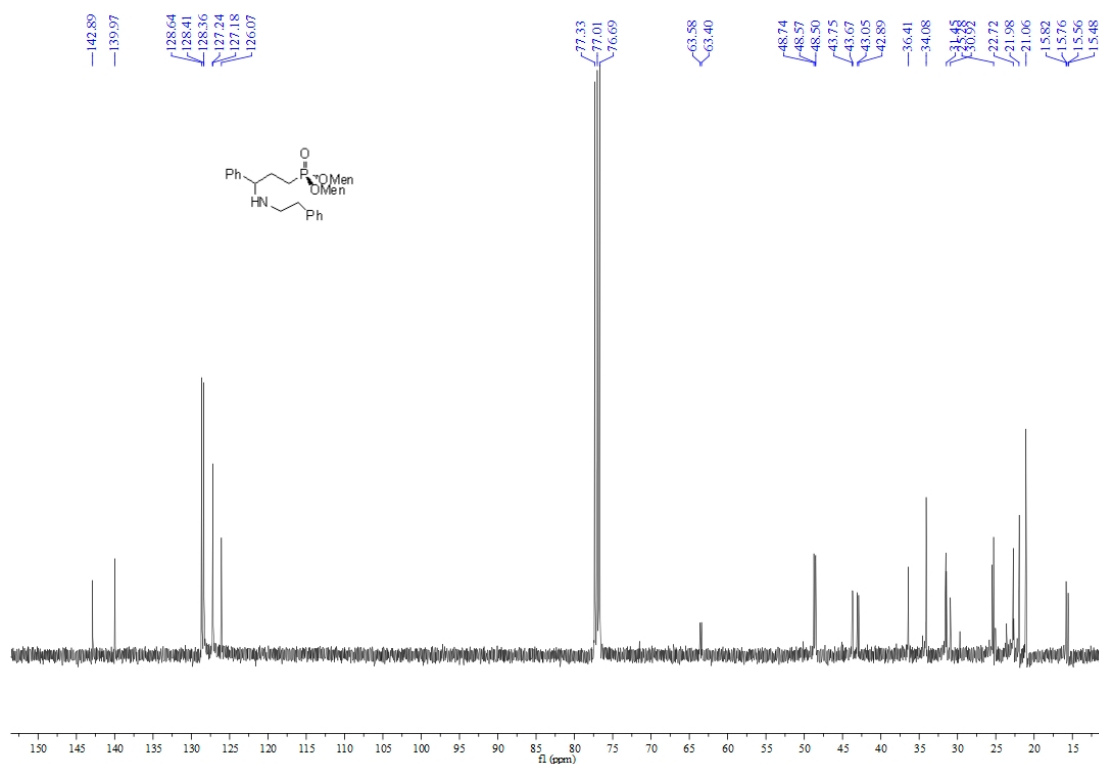

**Dimethyl 3-phenyl-3-pyrrolidin-1-yl propylphosphonate, 11dc,  $^{31}\text{P}$  NMR spectroscopy**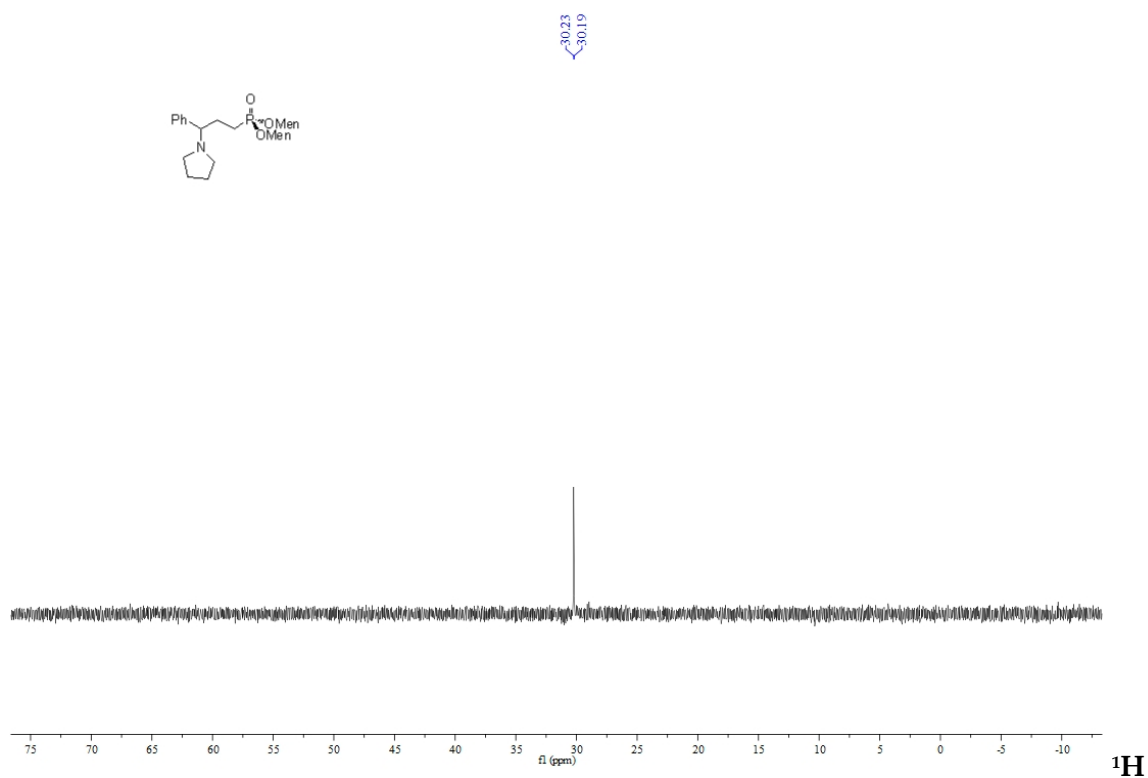**NMR spectroscopy of 11dc**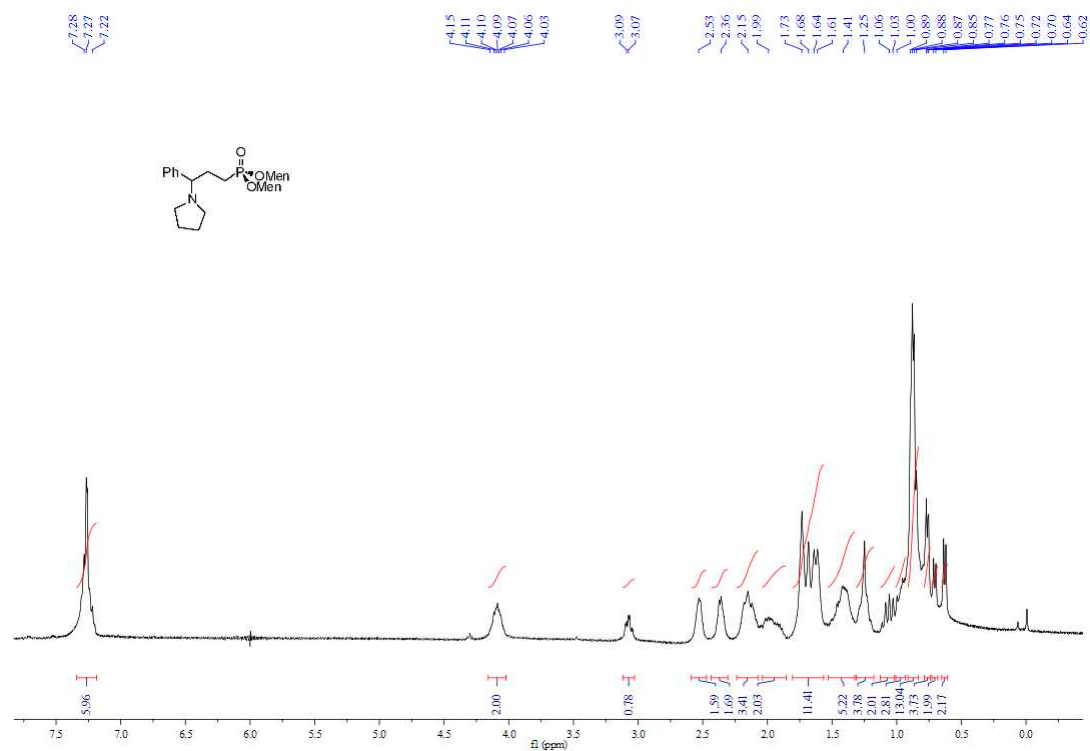

**$^{13}\text{C}$  NMR spectroscopy of 11dc**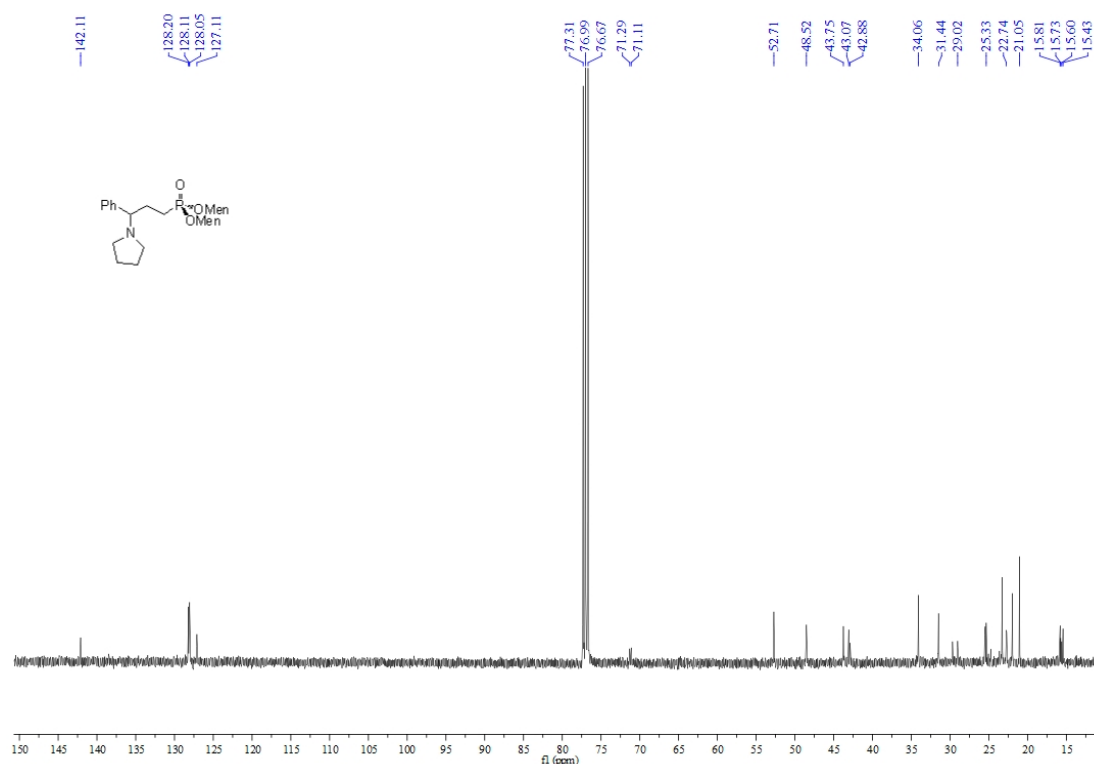**Dimethyl-3-methyl phenylamino-3-phenyl propylphosphonate, 11dd,  $^{31}\text{P}$  NMR spectroscopy**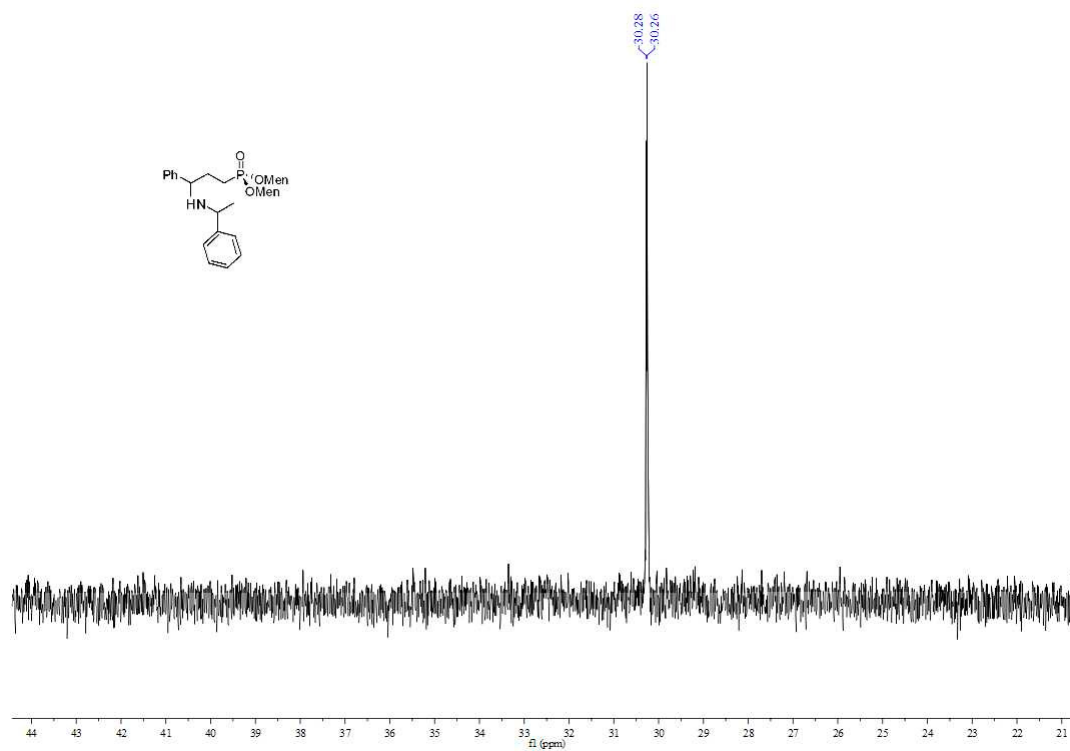

<sup>1</sup>H NMR spectroscopy of 11dd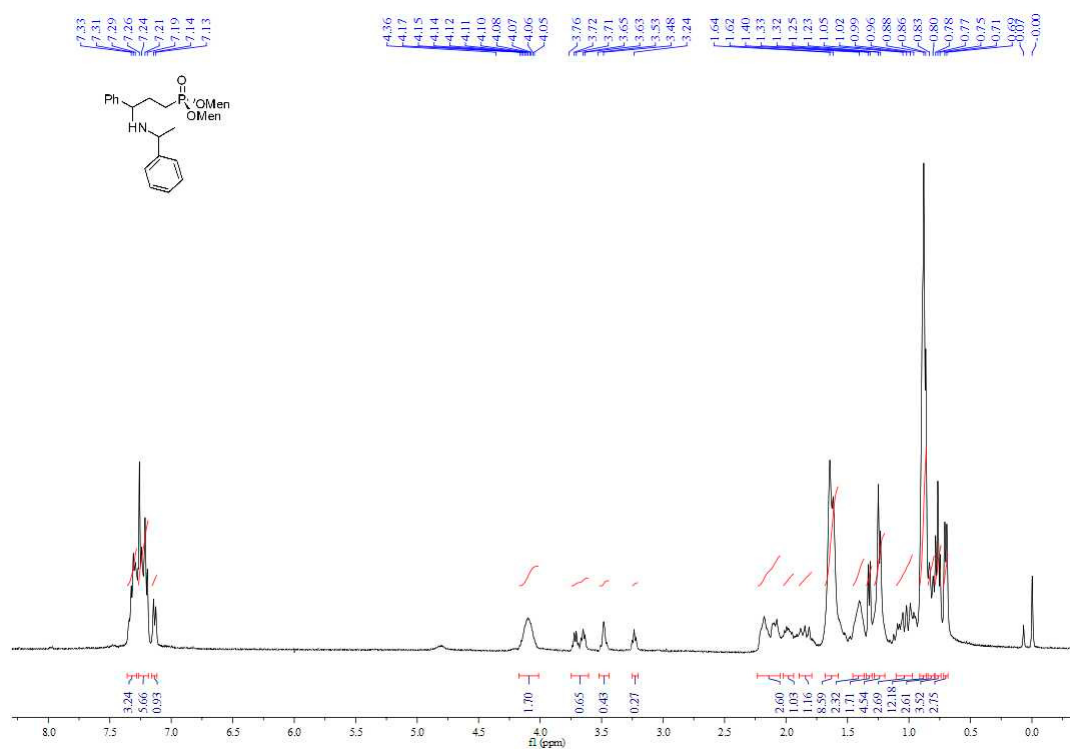<sup>13</sup>C NMR spectroscopy of 11dd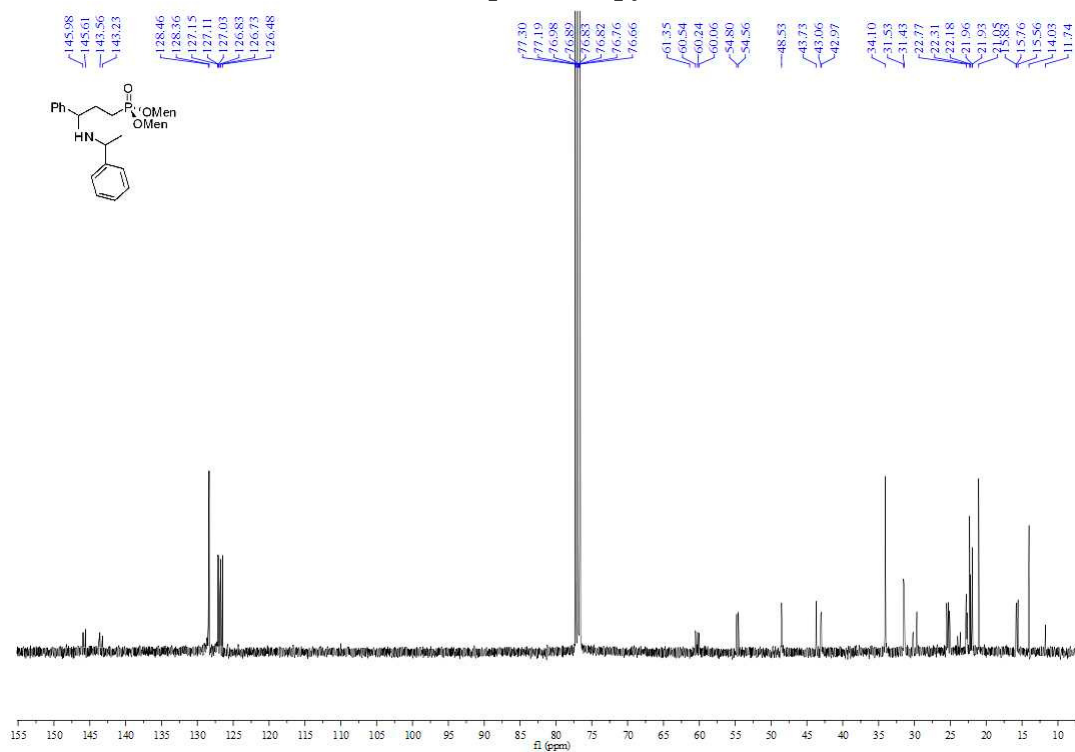

**Diethyl 3-butylamino-3-p-tolyl propylphosphonate, 11ea,  $^{31}\text{P}$  NMR spectroscopy**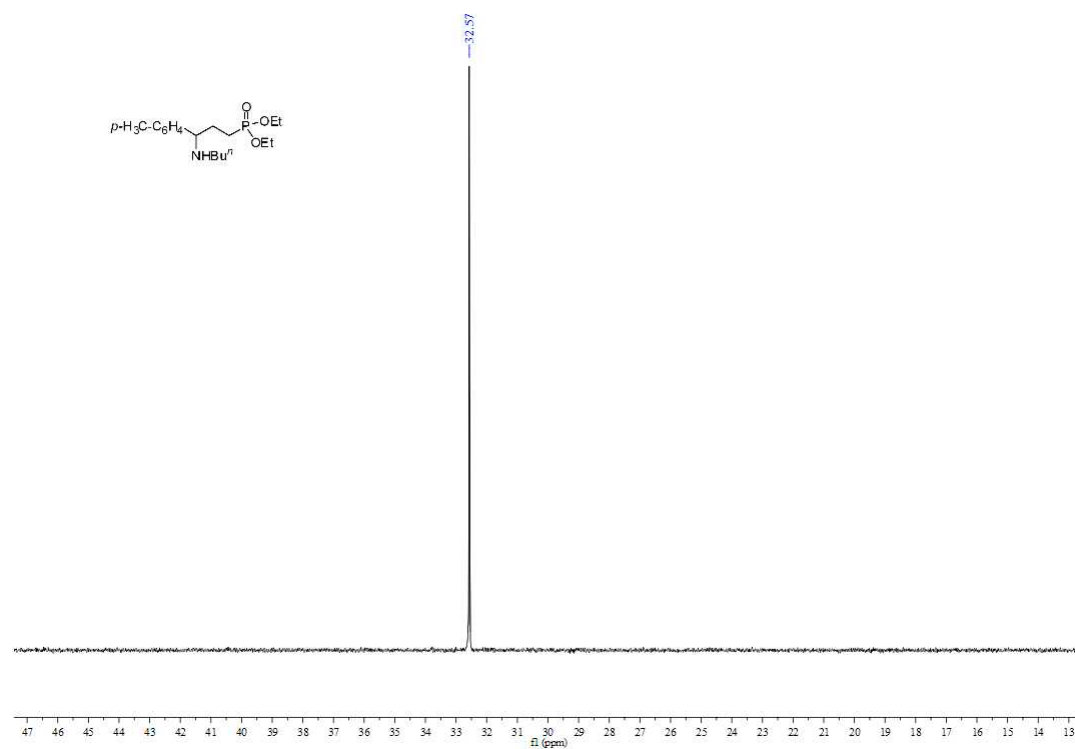 **$^1\text{H}$  NMR spectroscopy of 11ea**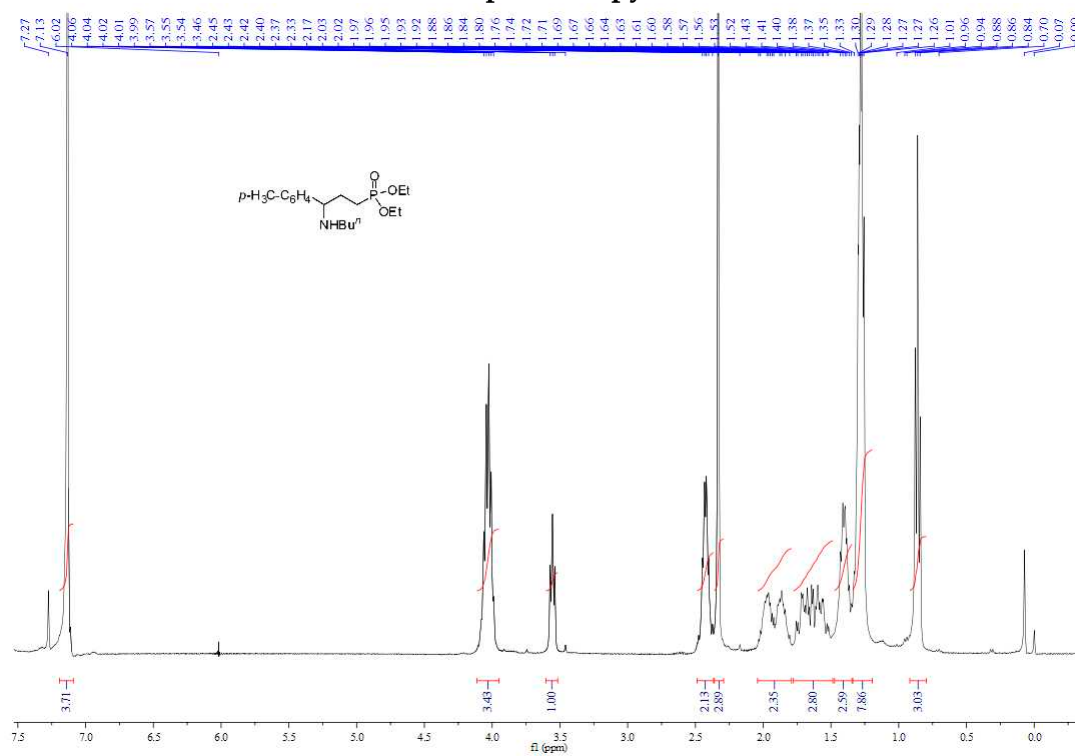

**<sup>13</sup>C NMR spectroscopy of 11ea**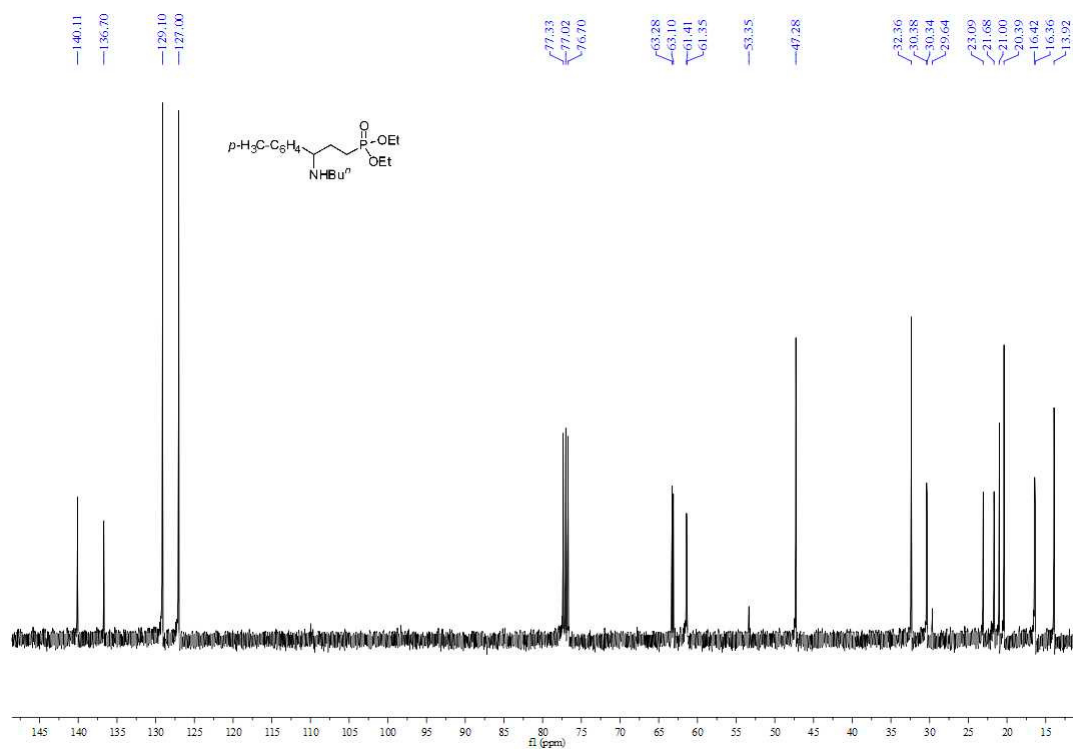**Diethyl 3-phenethylamino-3-*p*-tolyl propylphosphonate, 11eb, <sup>31</sup>P NMR spectroscopy**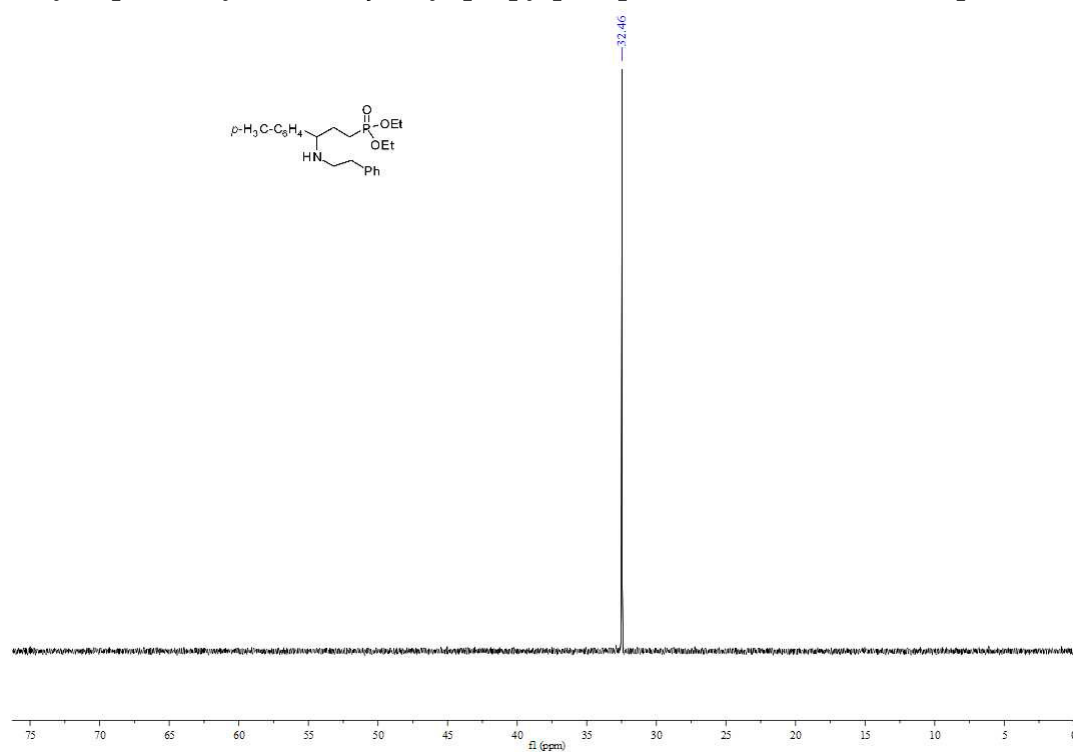

**$^1\text{H}$  NMR spectroscopy of 11eb**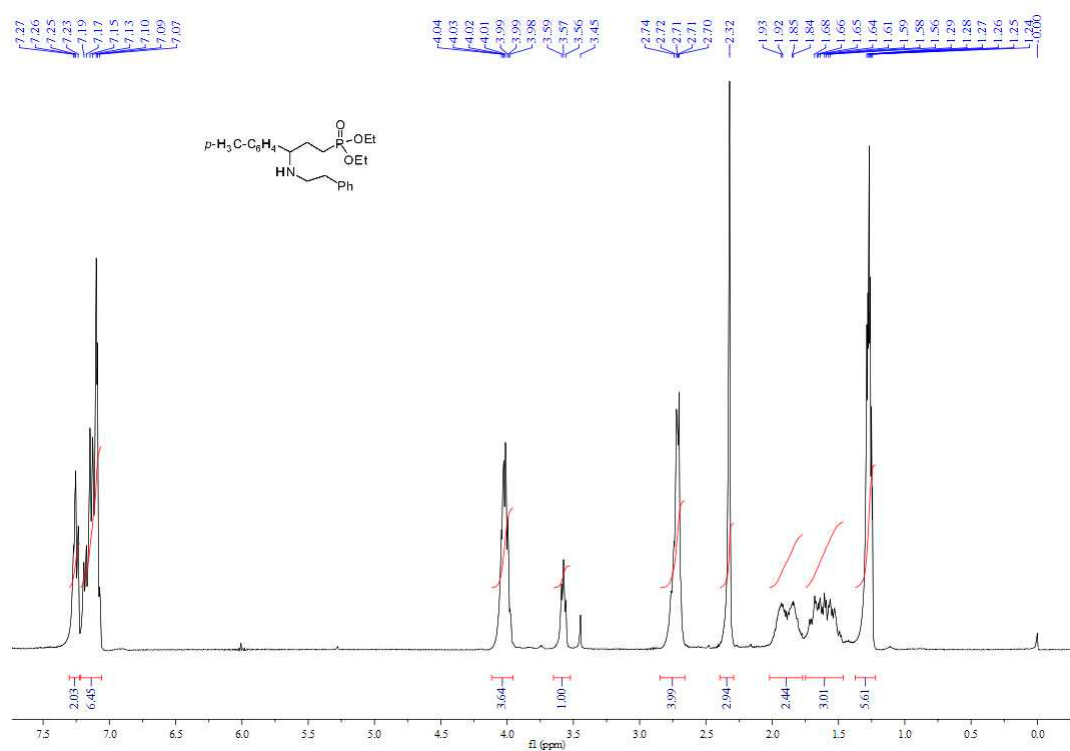 **$^{13}\text{C}$  NMR spectroscopy of 11eb**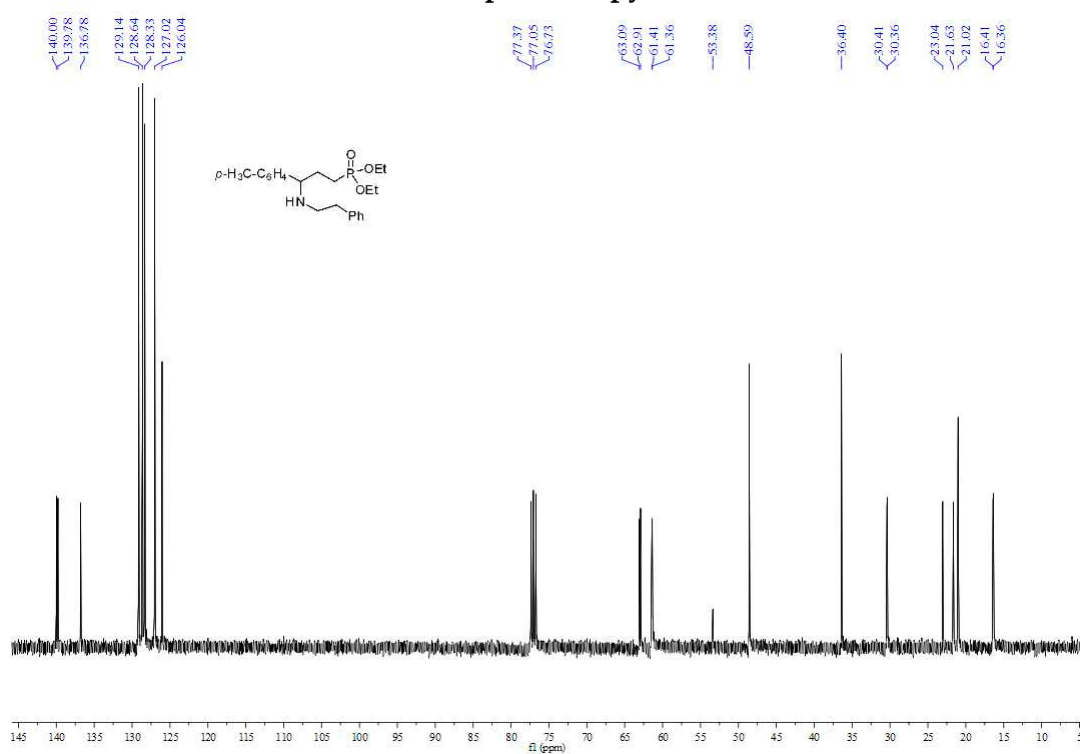

Diphenyl 3-butylamino-3-phenylpropyl phosphine oxide, 11fa,  $^{31}\text{P}$  NMR spectroscopy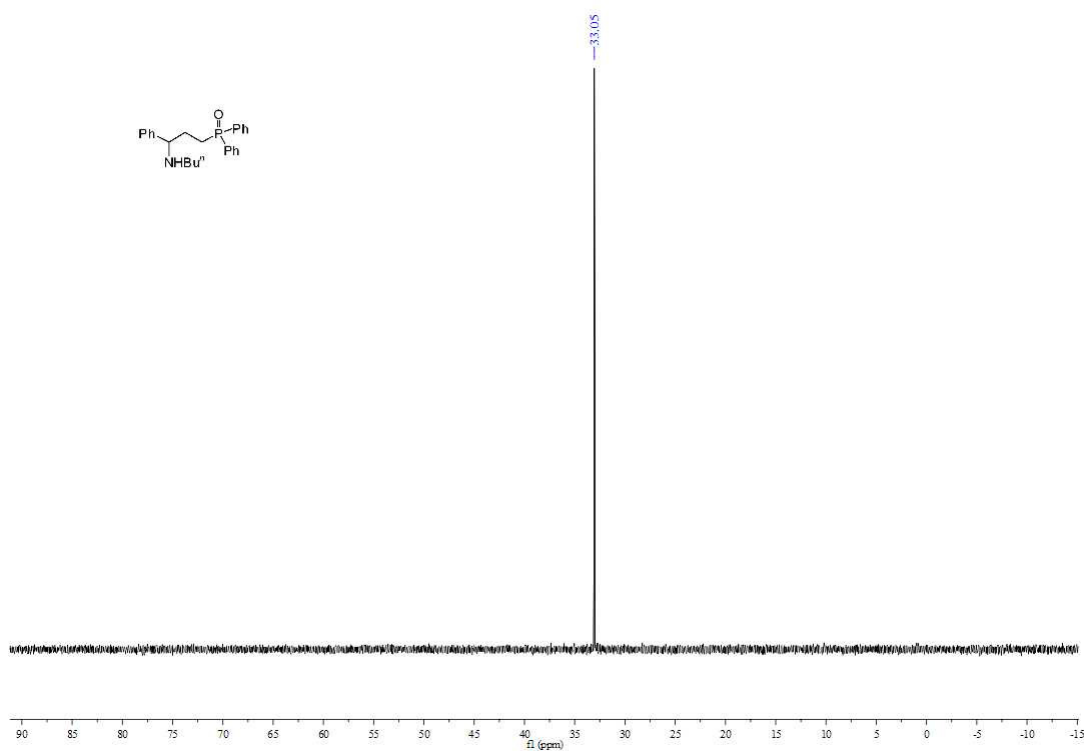 $^1\text{H}$  NMR spectroscopy of 11fa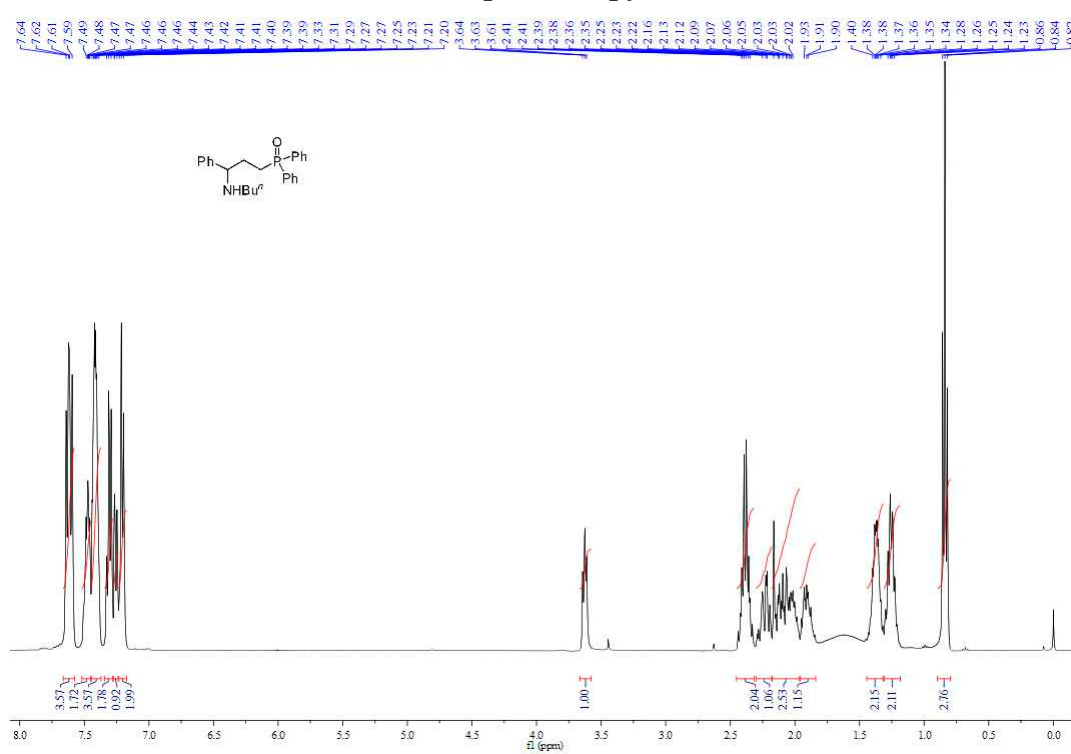

**$^{13}\text{C}$  NMR spectroscopy of 11fa**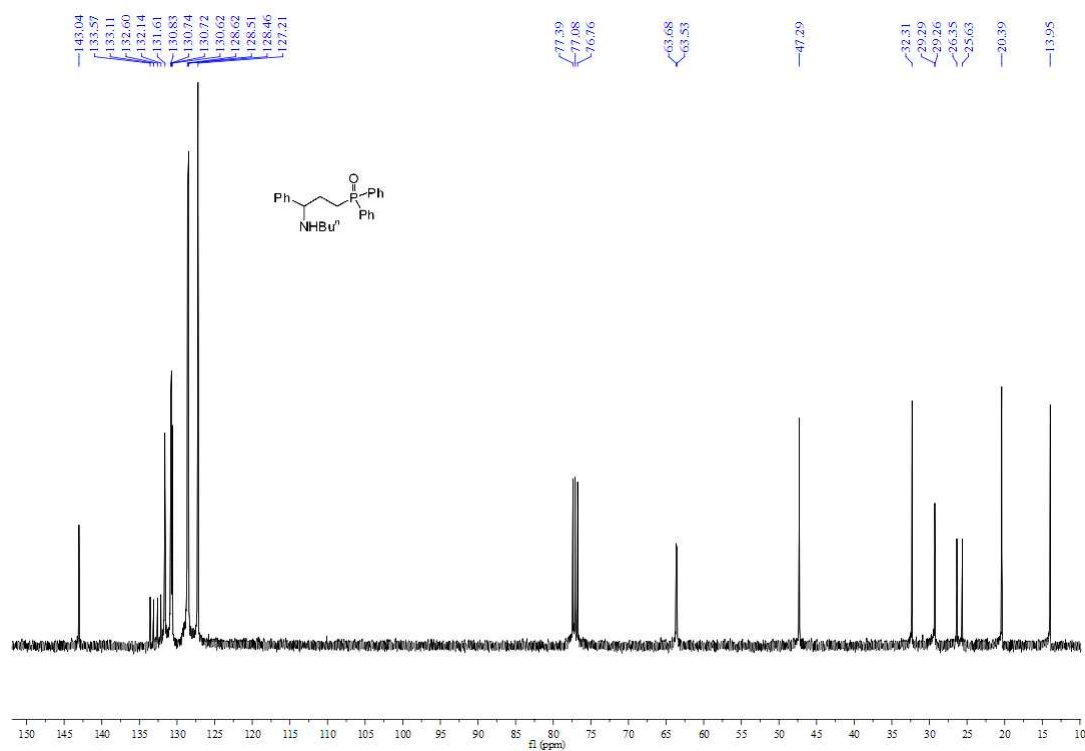**Diphenyl 3-phenethylamino-3-phenylpropyl phosphine oxide, 11fb,  $^{31}\text{P}$  NMR spectroscopy**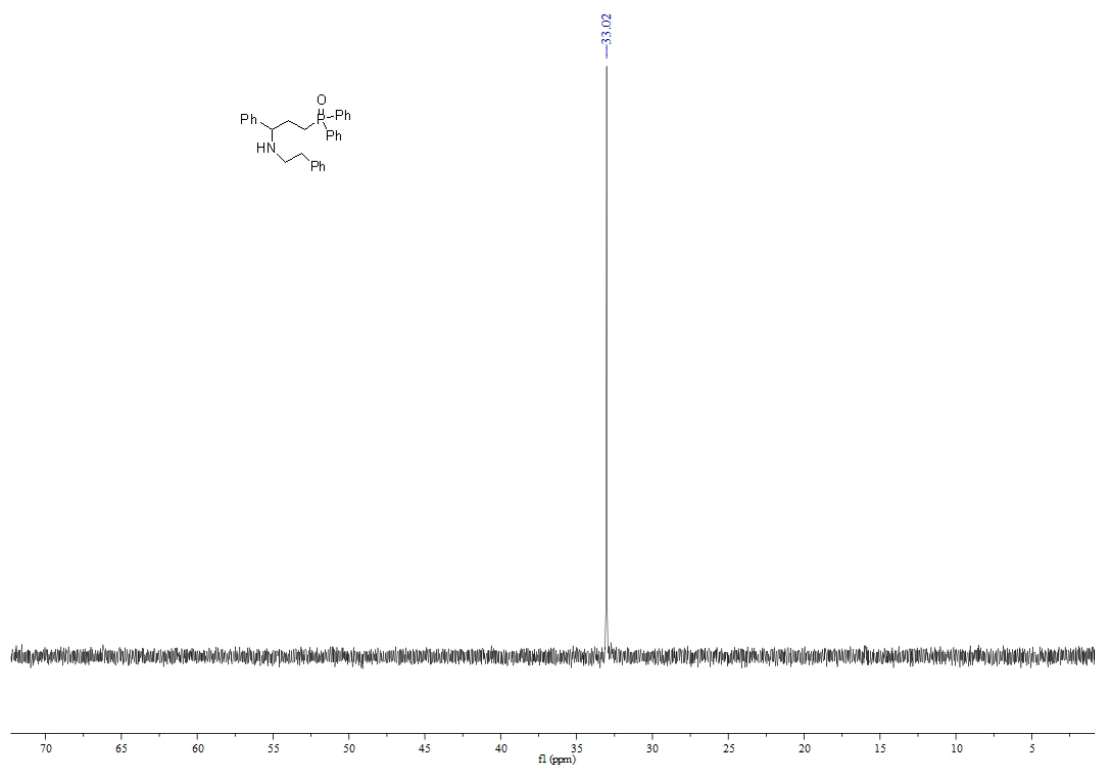

**$^1\text{H}$  NMR spectroscopy of 11fb**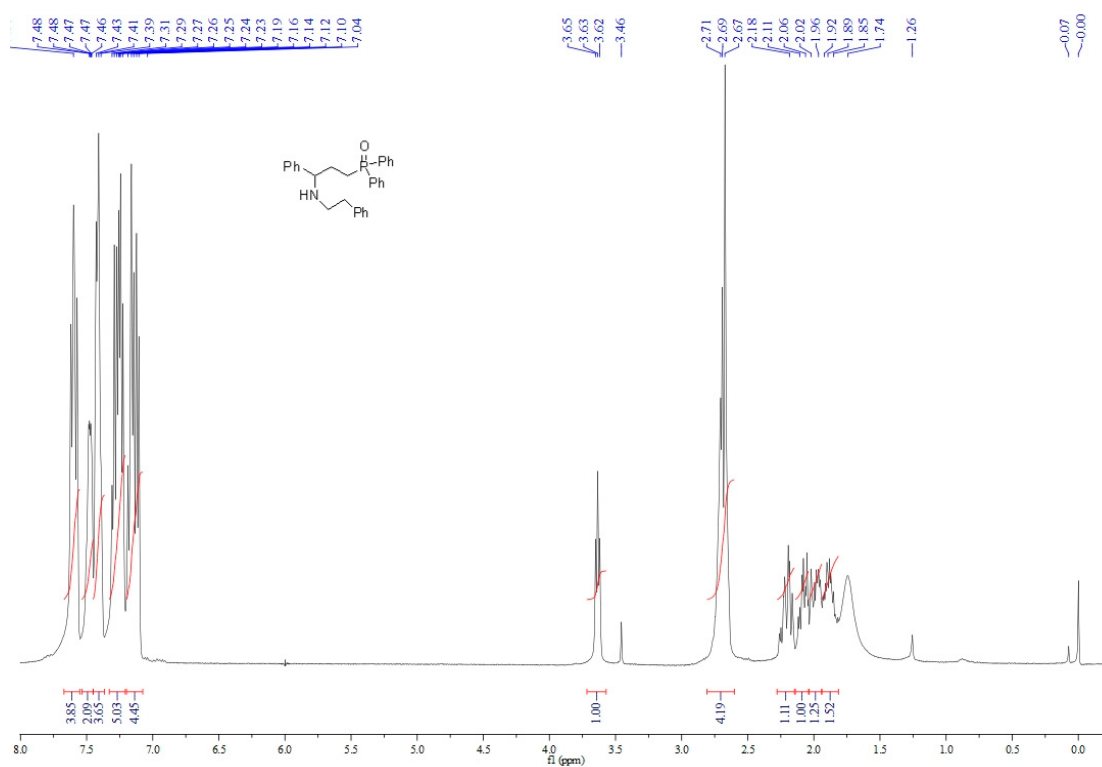 **$^{13}\text{C}$  NMR spectroscopy of 11fb**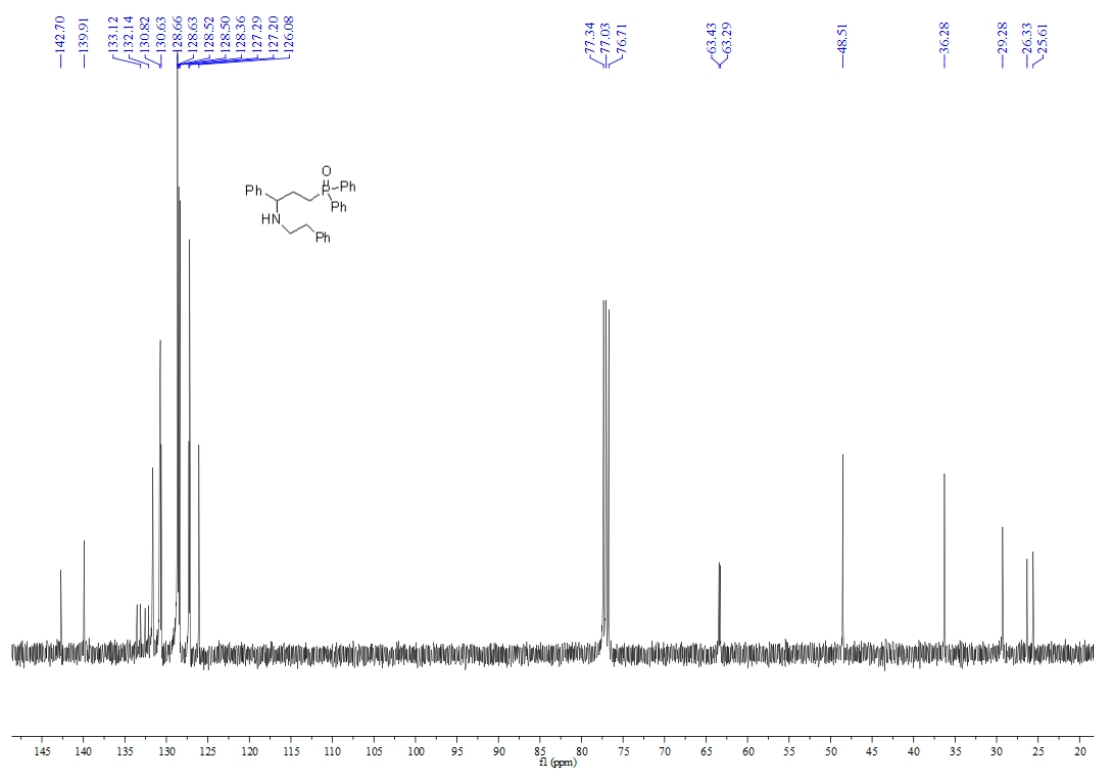

**(S<sub>P</sub>)-Menthyl-3-butylamino-3-phenylpropyl phenylphosphine oxide, 11ga/11ga<sub>B</sub>, <sup>31</sup>P**  
**NMR spectroscopy**

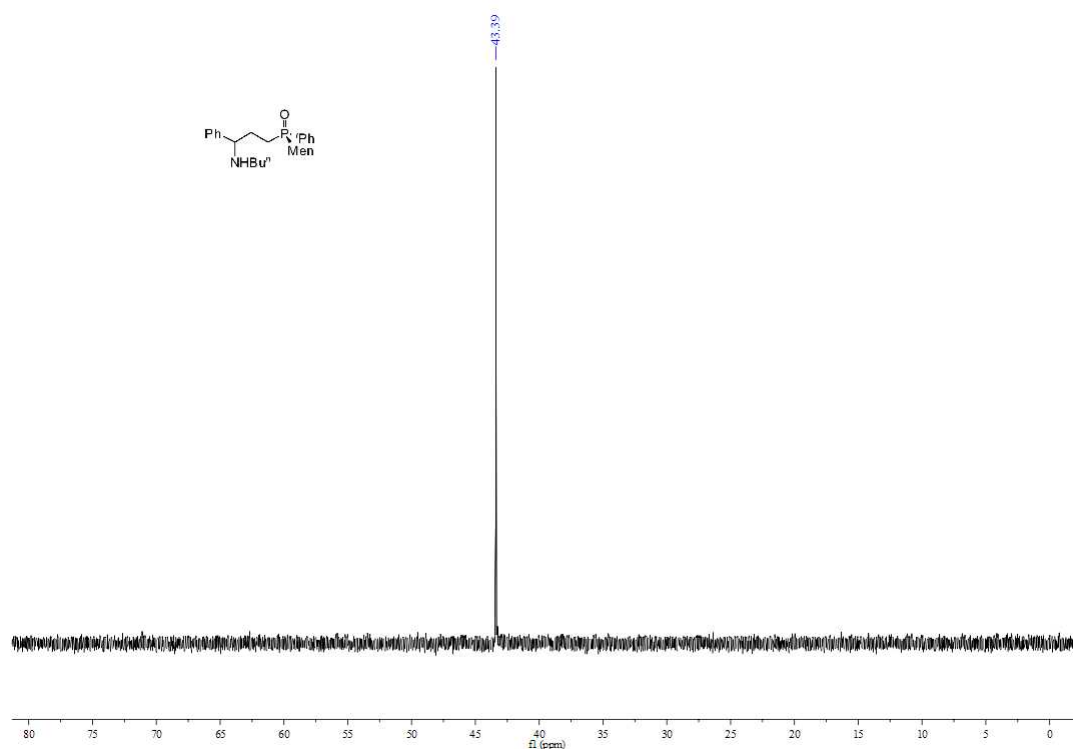

**<sup>1</sup>H NMR spectroscopy of 11ga/11ga<sub>B</sub>**

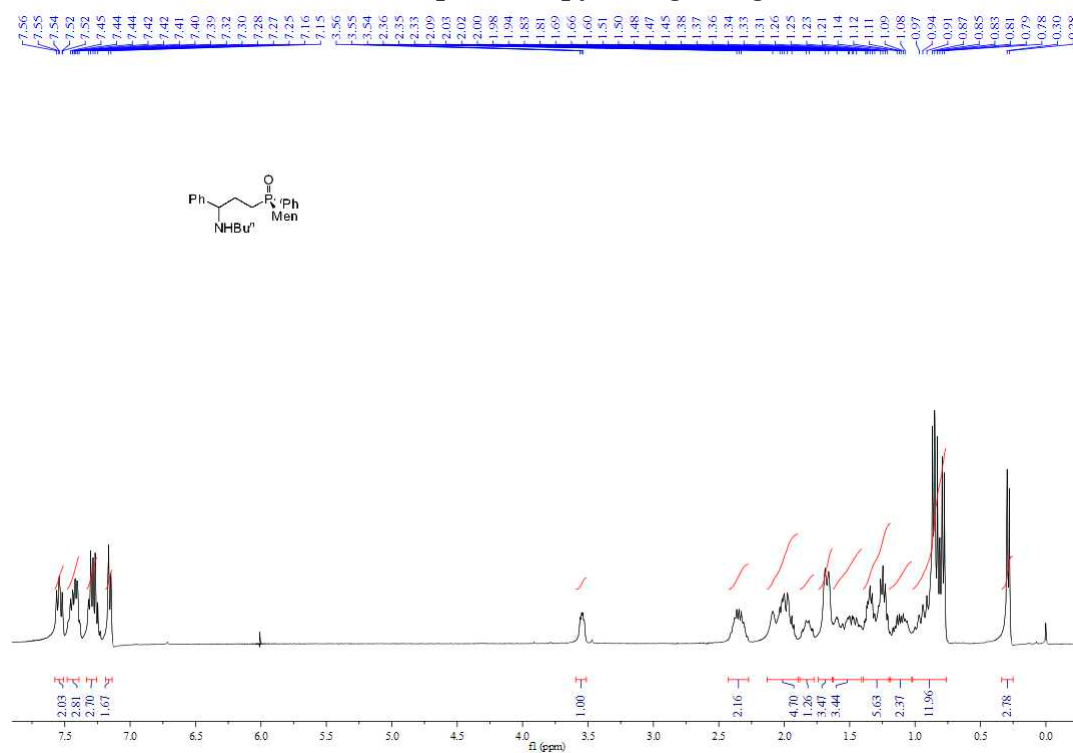

**<sup>13</sup>C NMR spectroscopy of 11ga/11gaB**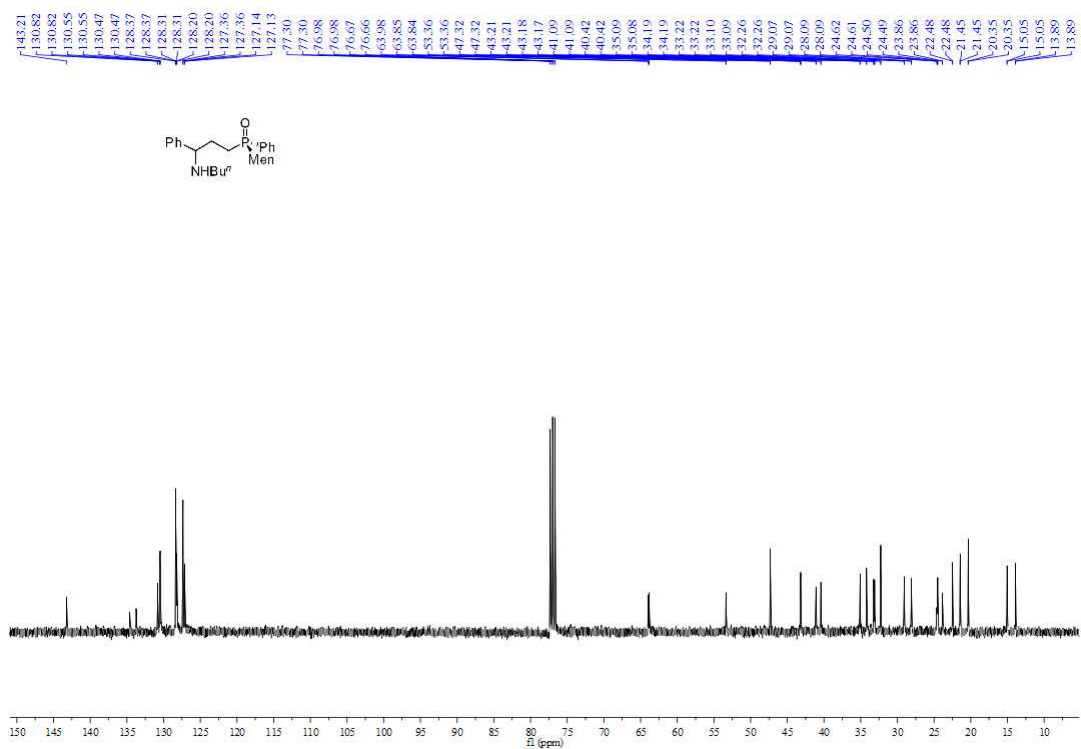**(S<sub>P</sub>)-Menthyl-3-phenethylamino-3-phenylpropyl phenylphosphine oxide, 11gb<sub>A</sub>/11gb<sub>B</sub>, 11gb<sub>A</sub>'/11gb<sub>B</sub>', <sup>31</sup>P NMR spectroscopy**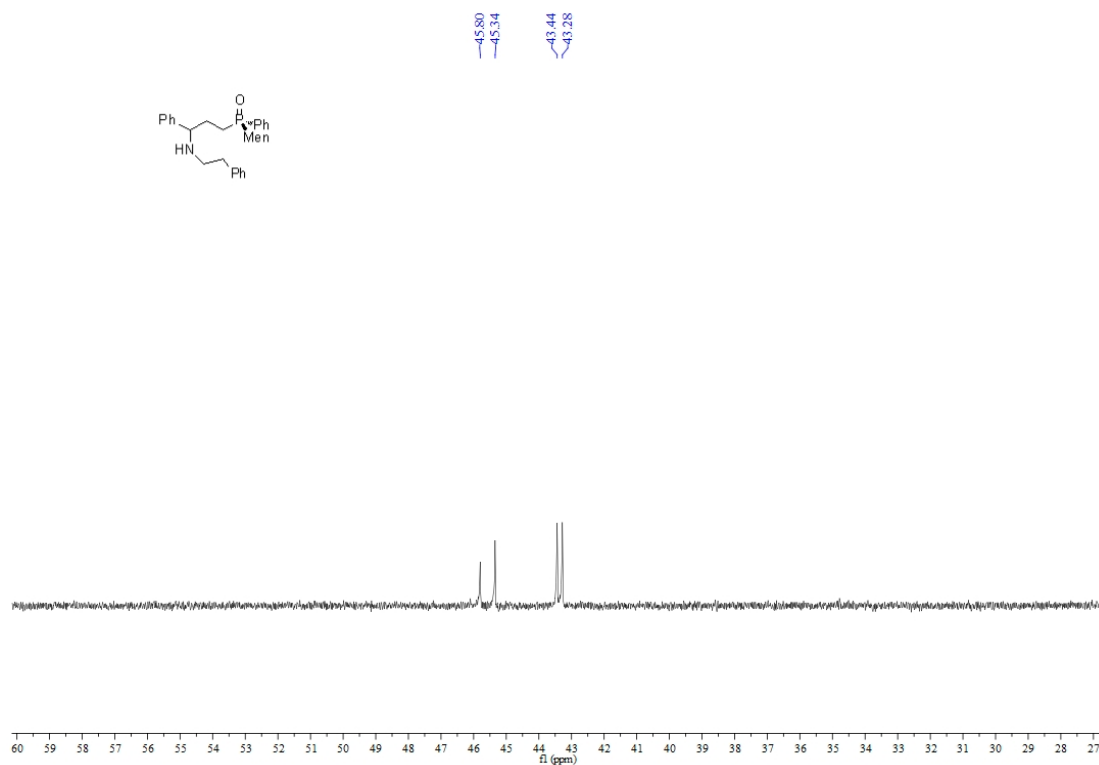

**<sup>1</sup>H NMR spectroscopy of 11gb<sub>A</sub>/11gb<sub>B</sub>, 11gb<sub>A</sub>'/11gb<sub>B</sub>'**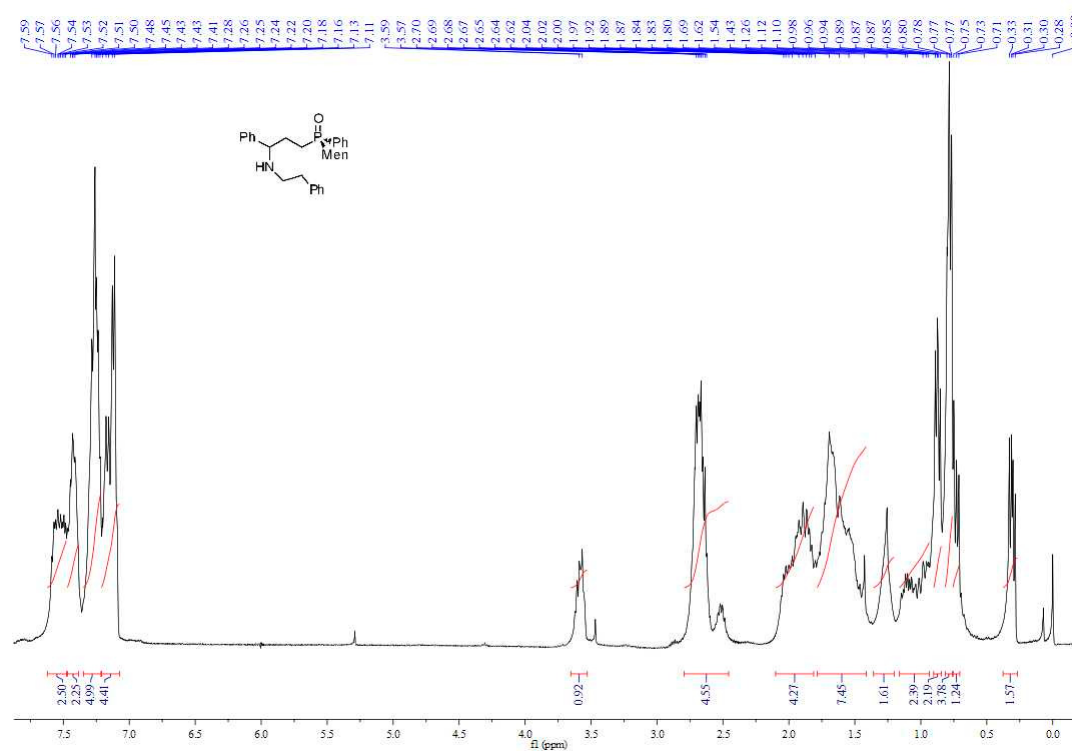**<sup>13</sup>C NMR spectroscopy of 11gb<sub>A</sub>/11gb<sub>B</sub>, 11gb<sub>A</sub>'/11gb<sub>B</sub>'**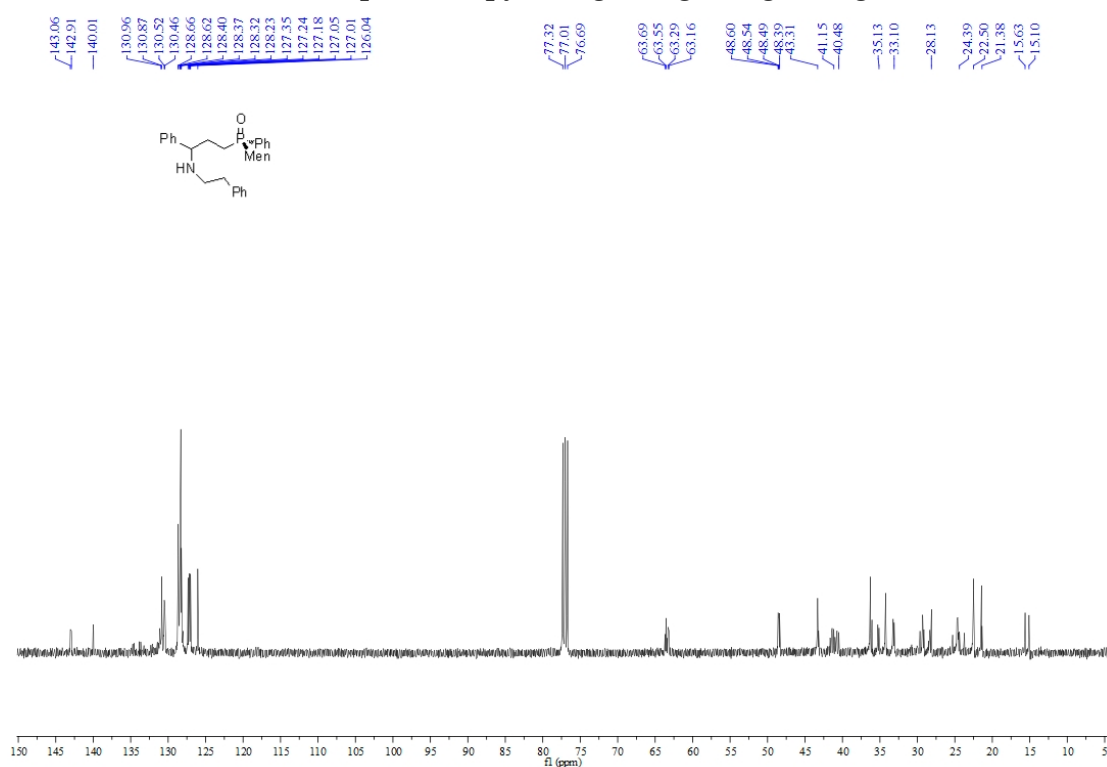

**Diphenyl 3-hydroxy-3-phenylprop-1-en-1-ylphosphine oxide, 12a,  $^{31}\text{P}$  NMR spectroscopy**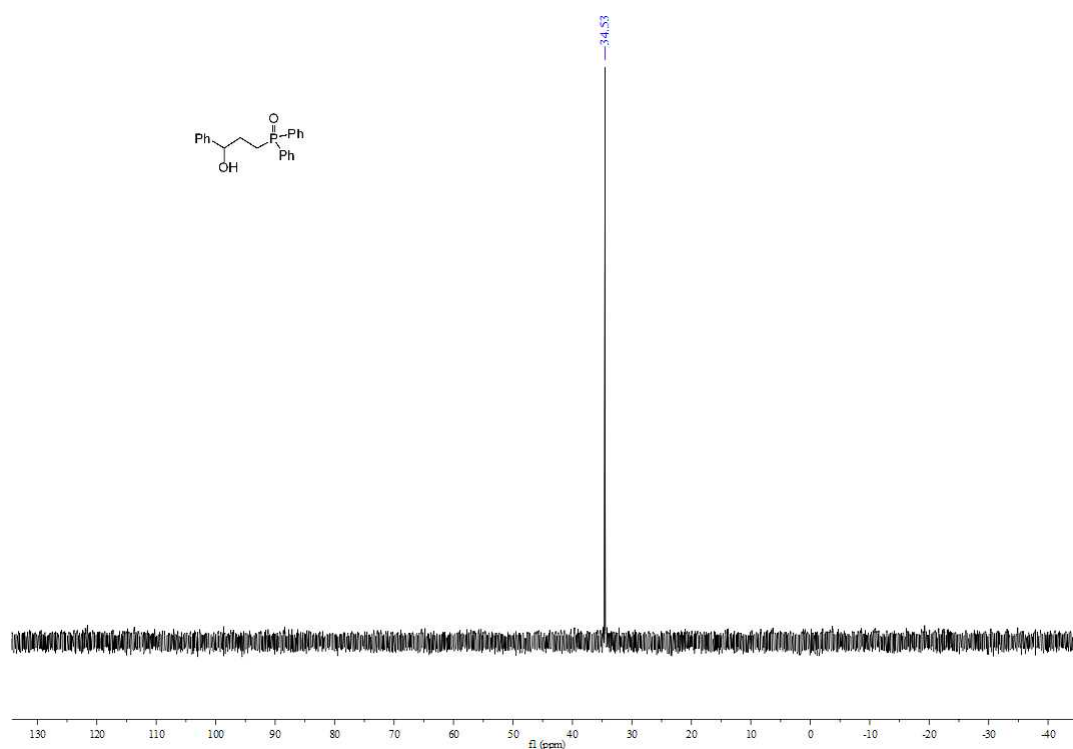 **$^1\text{H}$  NMR spectroscopy of 12a**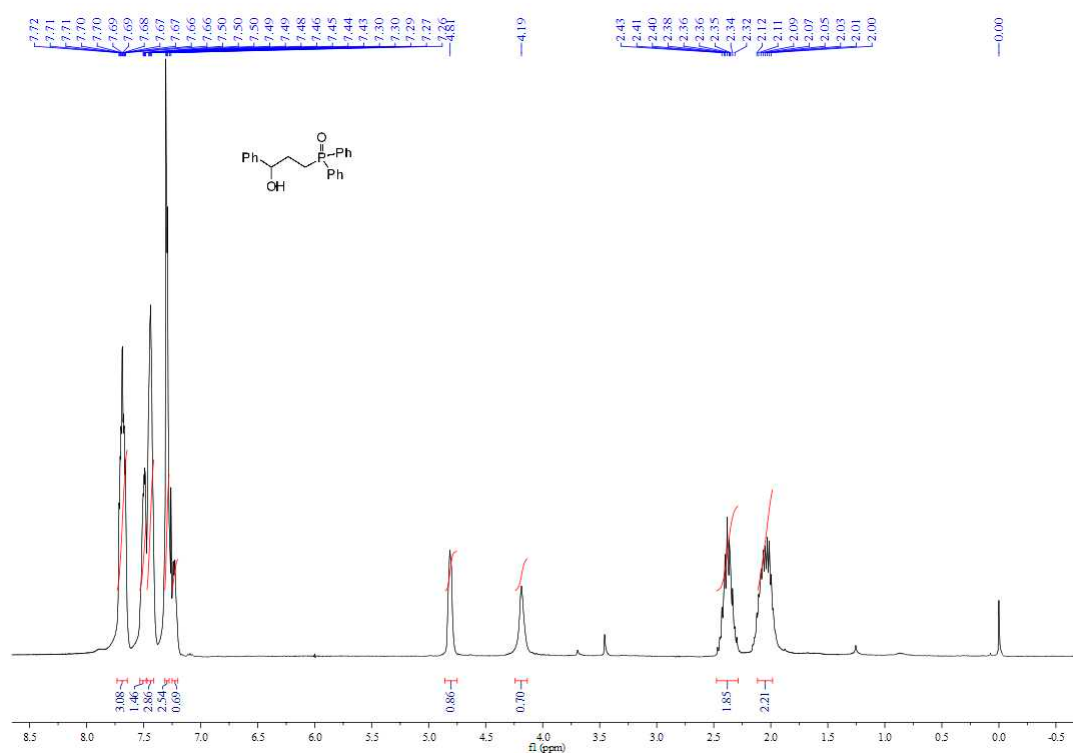

**$^{13}\text{C}$  NMR spectroscopy of 12a**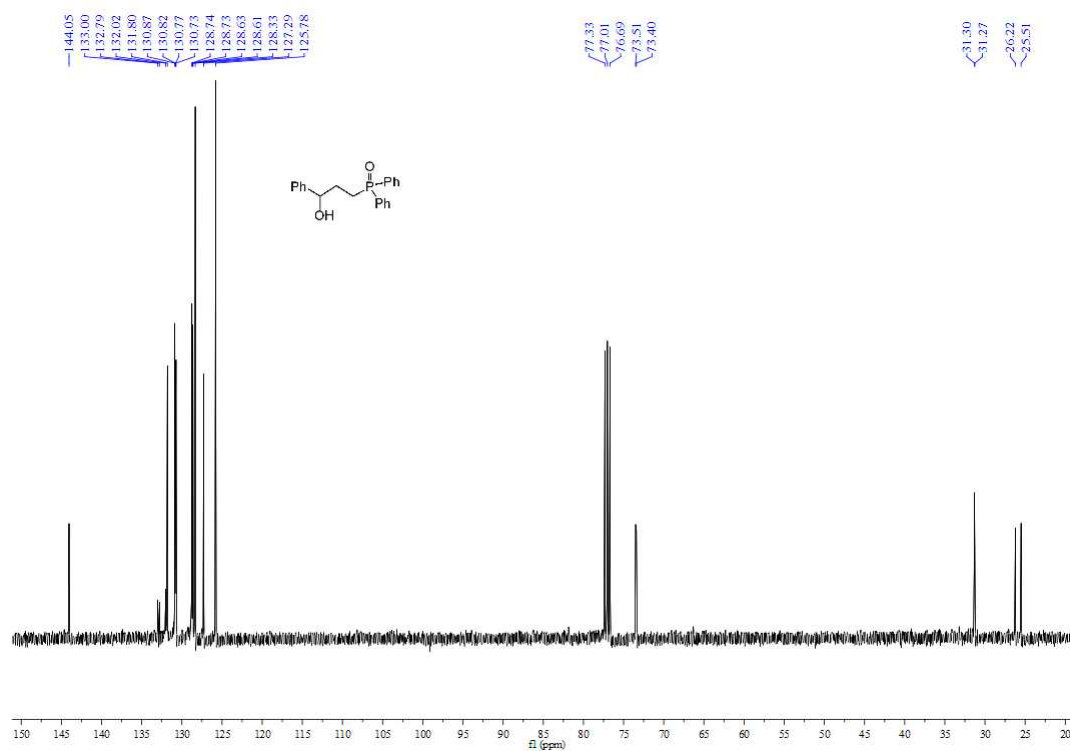**Dimethyl 3-hydroxy-3-phenylprop-1-en-1-ylphosphonate, 12b,  $^{31}\text{P}$  NMR spectroscopy**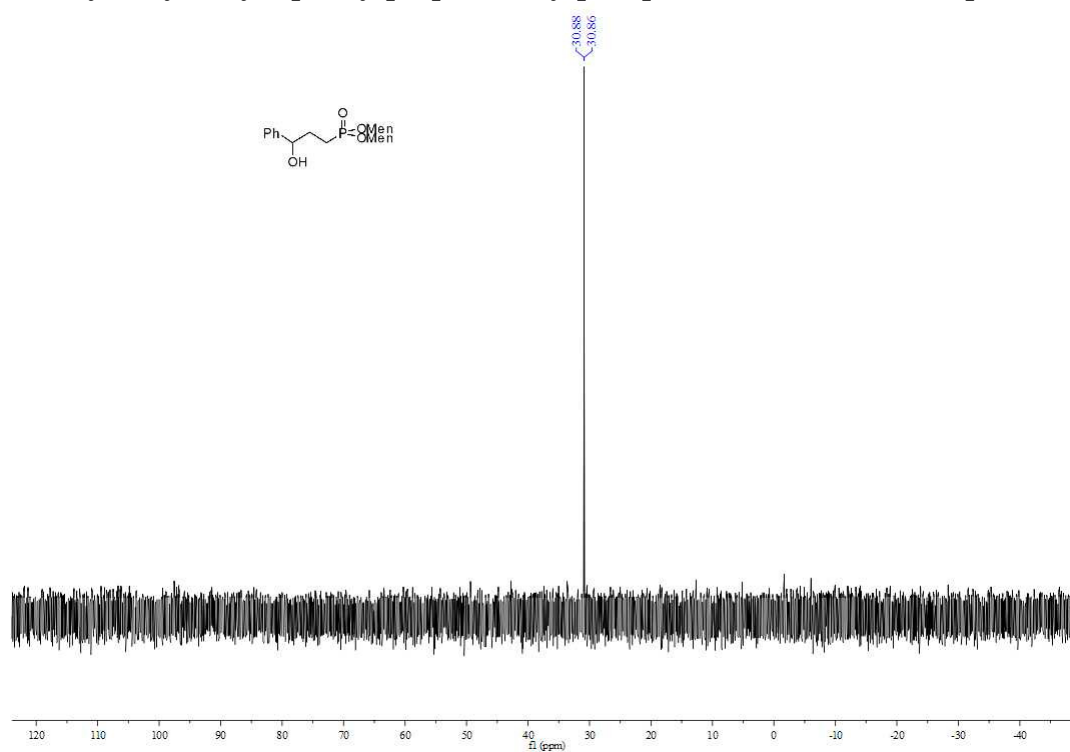

<sup>1</sup>H NMR spectroscopy of 12b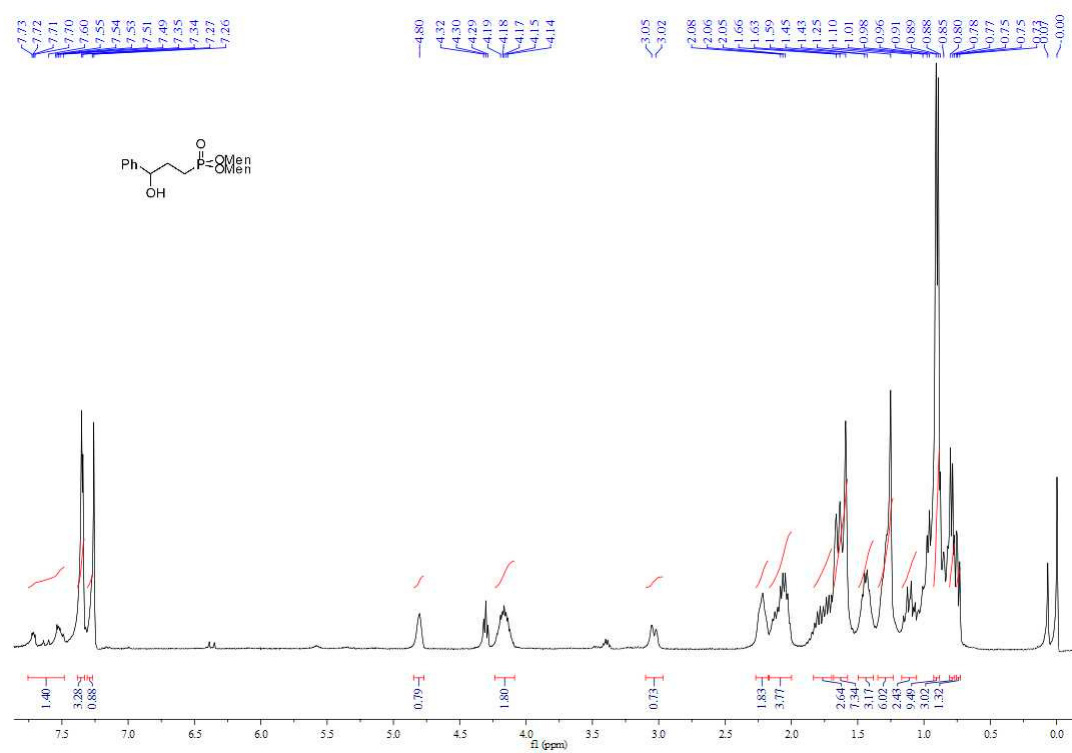<sup>13</sup>C NMR spectroscopy of 12b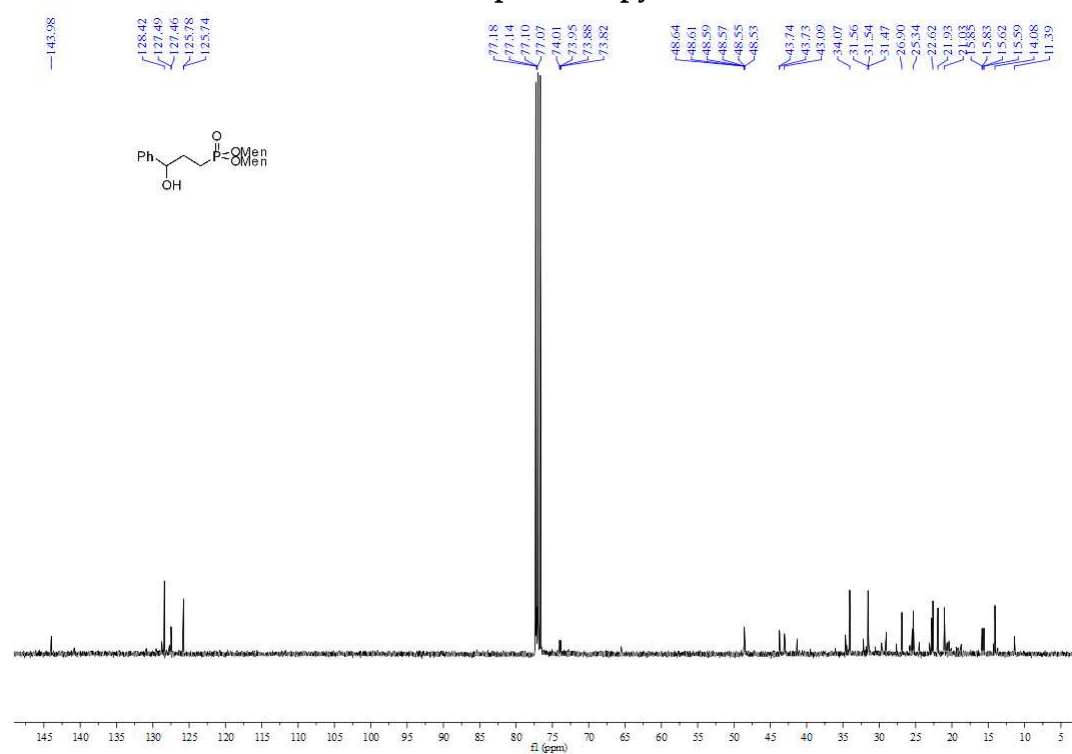

**Dimethoxyl 2-benzoyl-4-cyanobutylphosphonate, 13a,  $^{31}\text{P}$  NMR spectroscopy**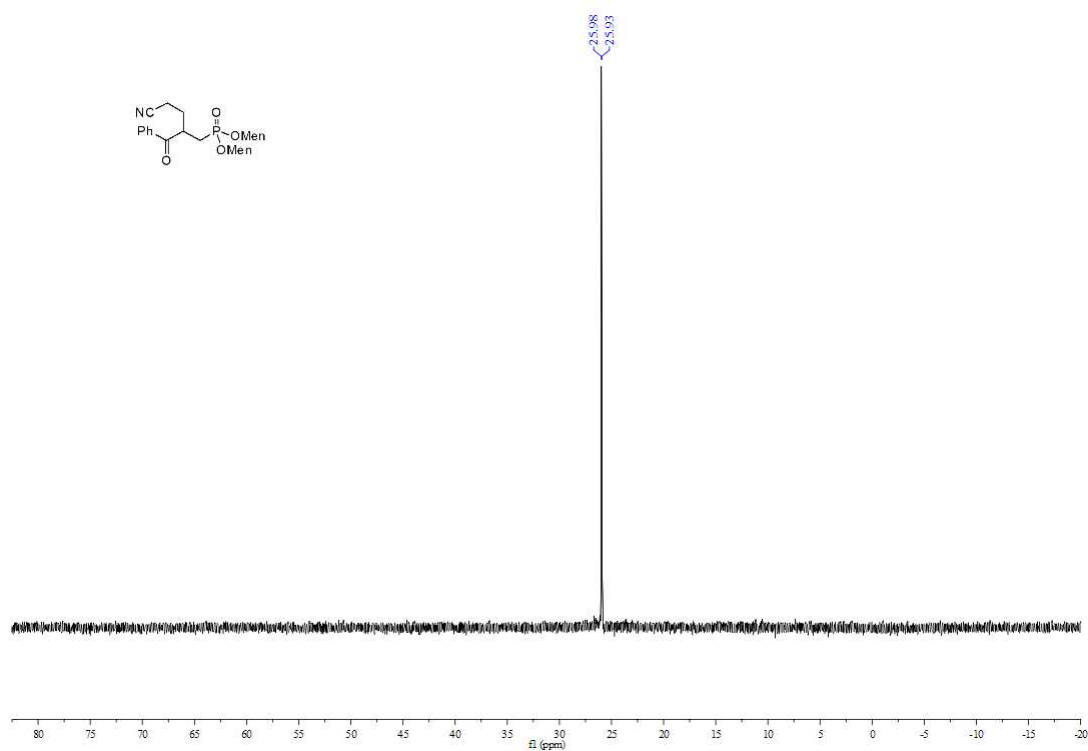 **$^1\text{H}$  NMR spectroscopy of 13a**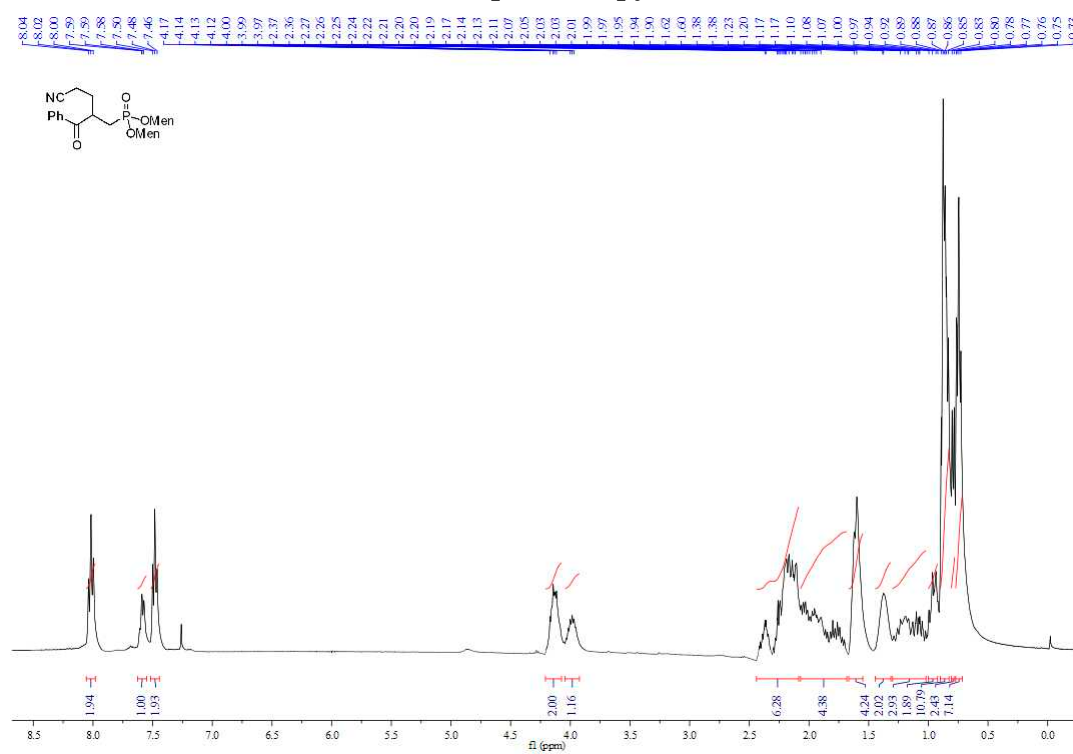

**<sup>13</sup>C NMR spectroscopy of 13a**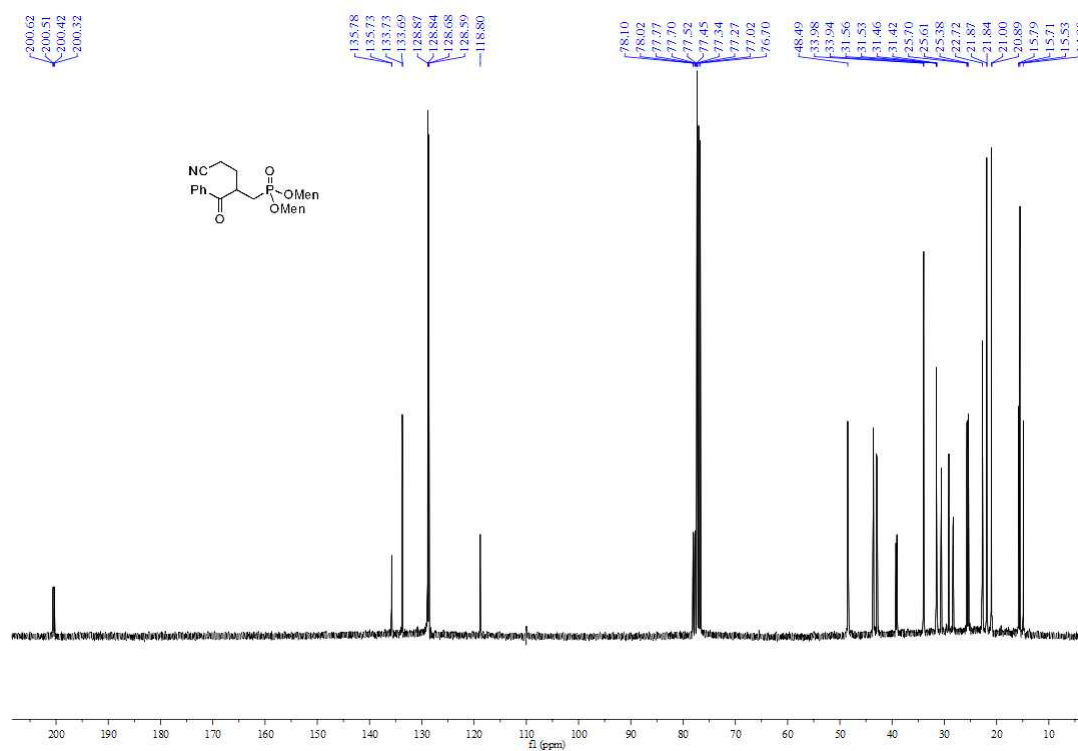**Ethyl 4-dimethoxyphosphorylmethyl-5-oxo-5-phenylpentanoate, 13b, <sup>31</sup>P NMR spectroscopy**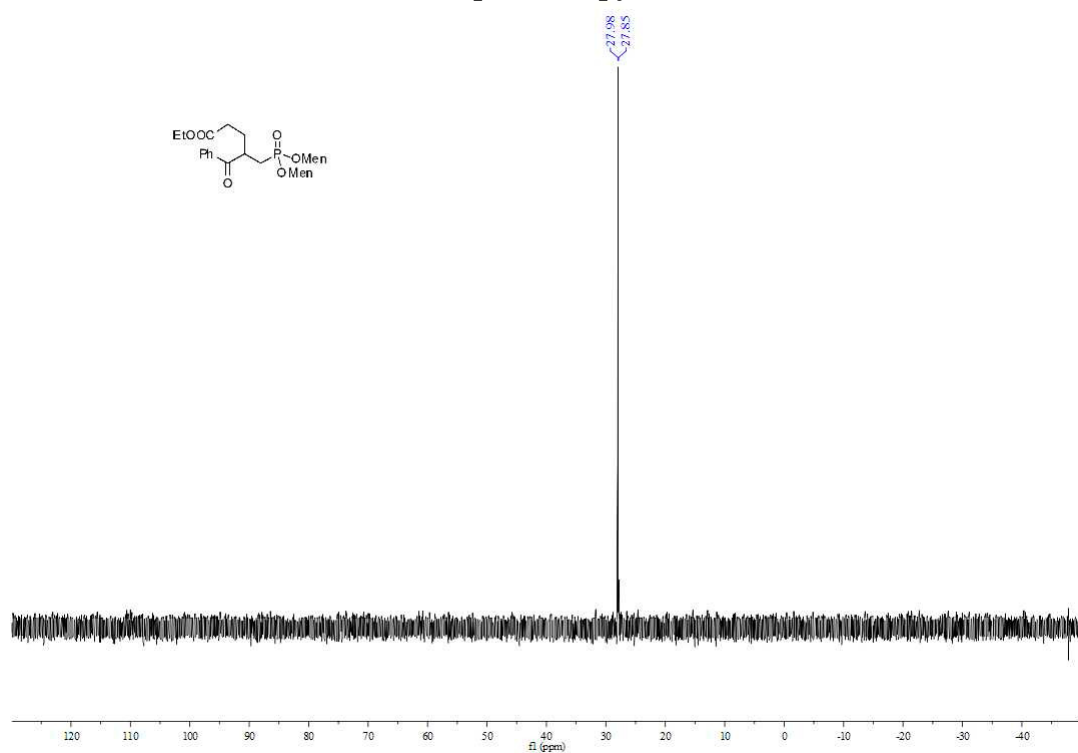

**<sup>1</sup>H NMR spectroscopy of 13b**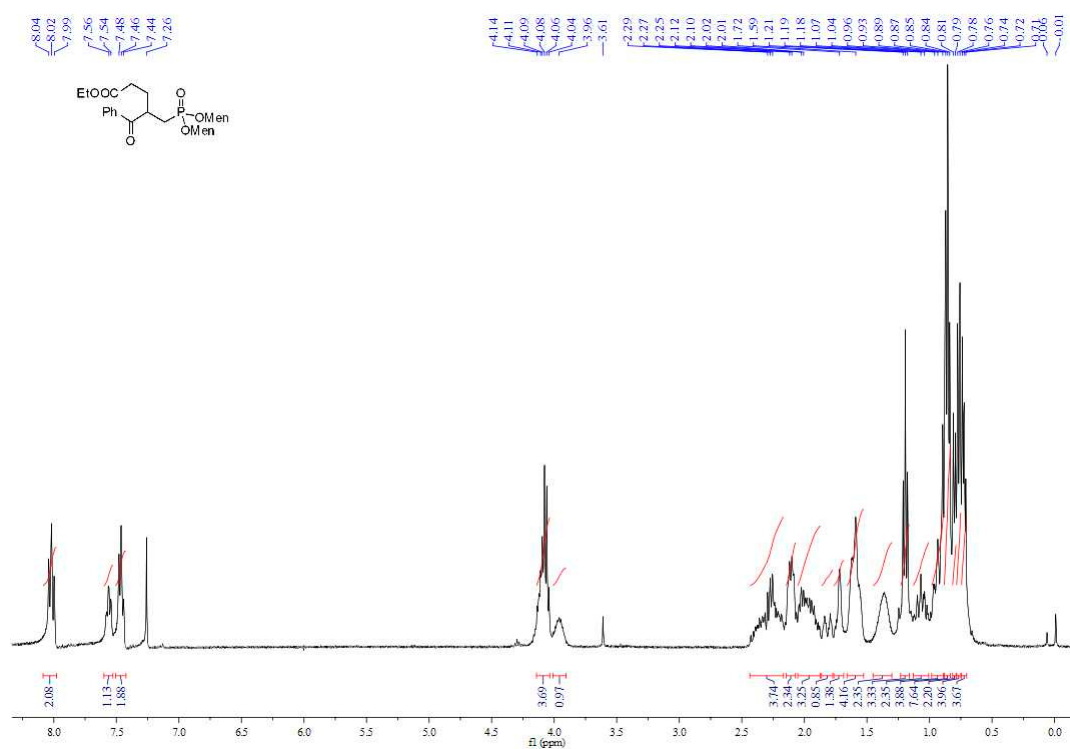**<sup>13</sup>C NMR spectroscopy of 13b**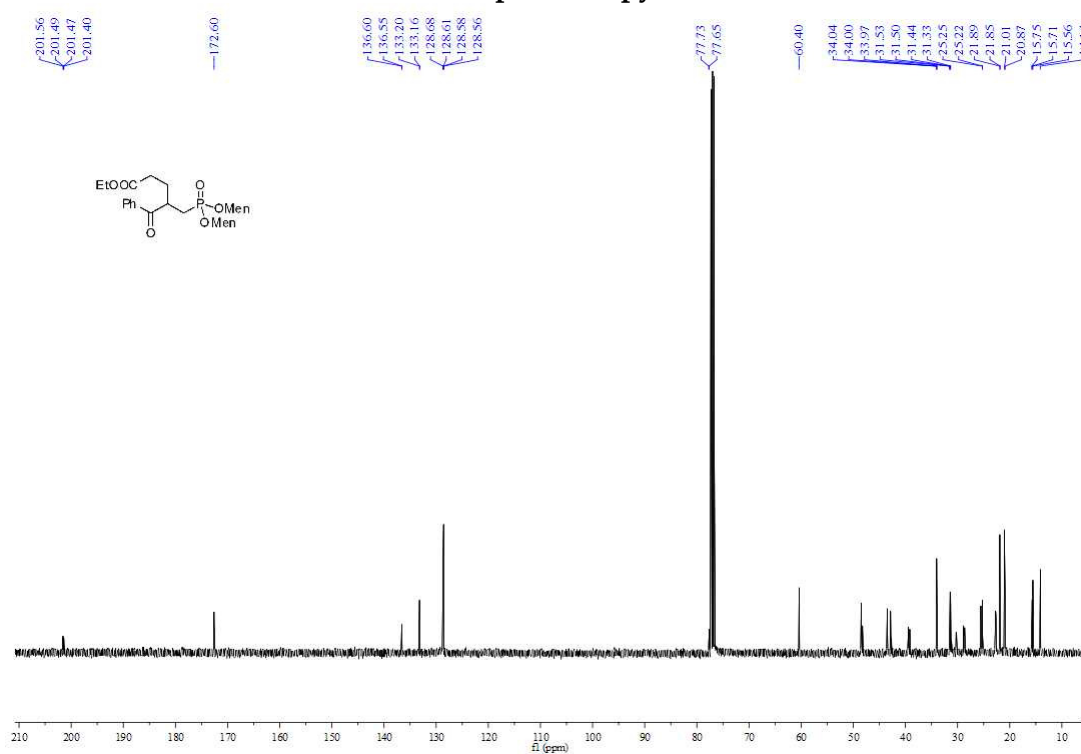

Supplement: s1 [file s1]
